# Supplementary material
Source: PubMed Central journal article supplement (PMC4136714)

## Supporting Information

### Therapeutic potential of targeting the oncogenic SHP2 phosphatase

Li-Fan Zeng<sup>#</sup>, Ruo-Yu Zhang<sup>#</sup>, Zhi-Hong Yu<sup>#</sup>, Sijiu Liu<sup>#</sup>, Li Wu<sup>‡</sup>, Andrea M. Gunawan<sup>‡</sup>, Brandon S. Lane<sup>#</sup>, Raghuveer S. Mali<sup>"</sup>, Xingjun Li<sup>"</sup>, Rebecca J. Chan<sup>"</sup>, Reuben Kapur<sup>"</sup>, Clark D. Wells<sup>#</sup>,  
and Zhong-Yin Zhang<sup>#‡\*</sup>

<sup>#</sup>Department of Biochemistry and Molecular Biology, <sup>"</sup>Herman B Wells Center for Pediatric Research, and <sup>‡</sup>Chemical Genomics Core Facility, Indiana University School of Medicine, 635 Barnhill Drive, Indianapolis, Indiana 46202 USA

<sup>1</sup>H NMR for compound 2

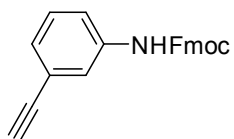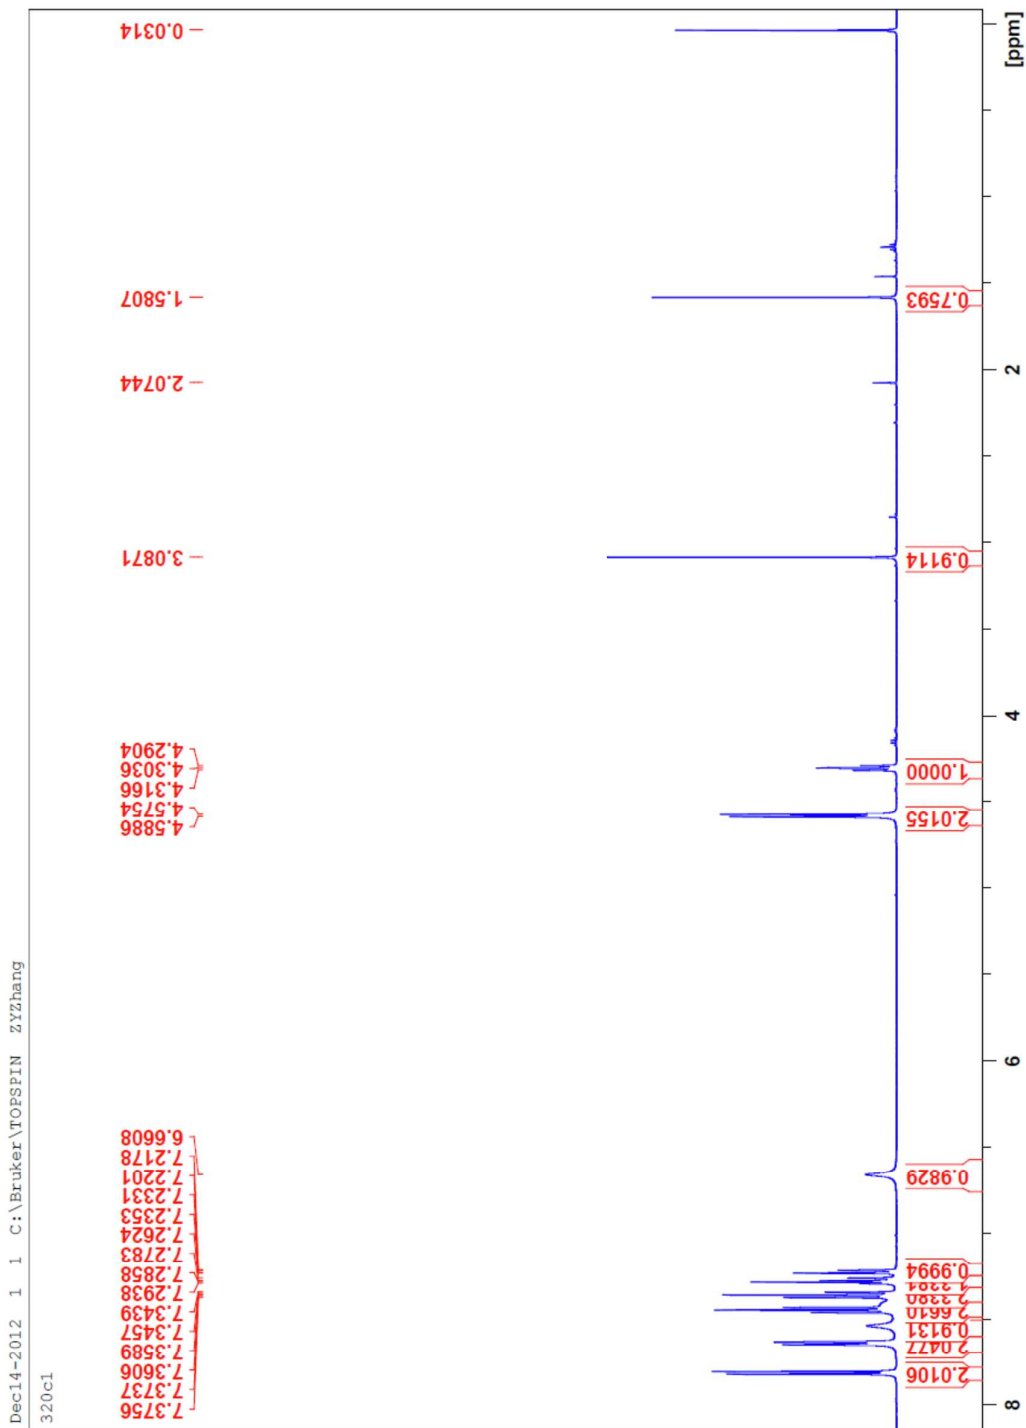

<sup>13</sup>C NMR for compound 2

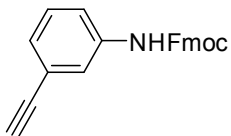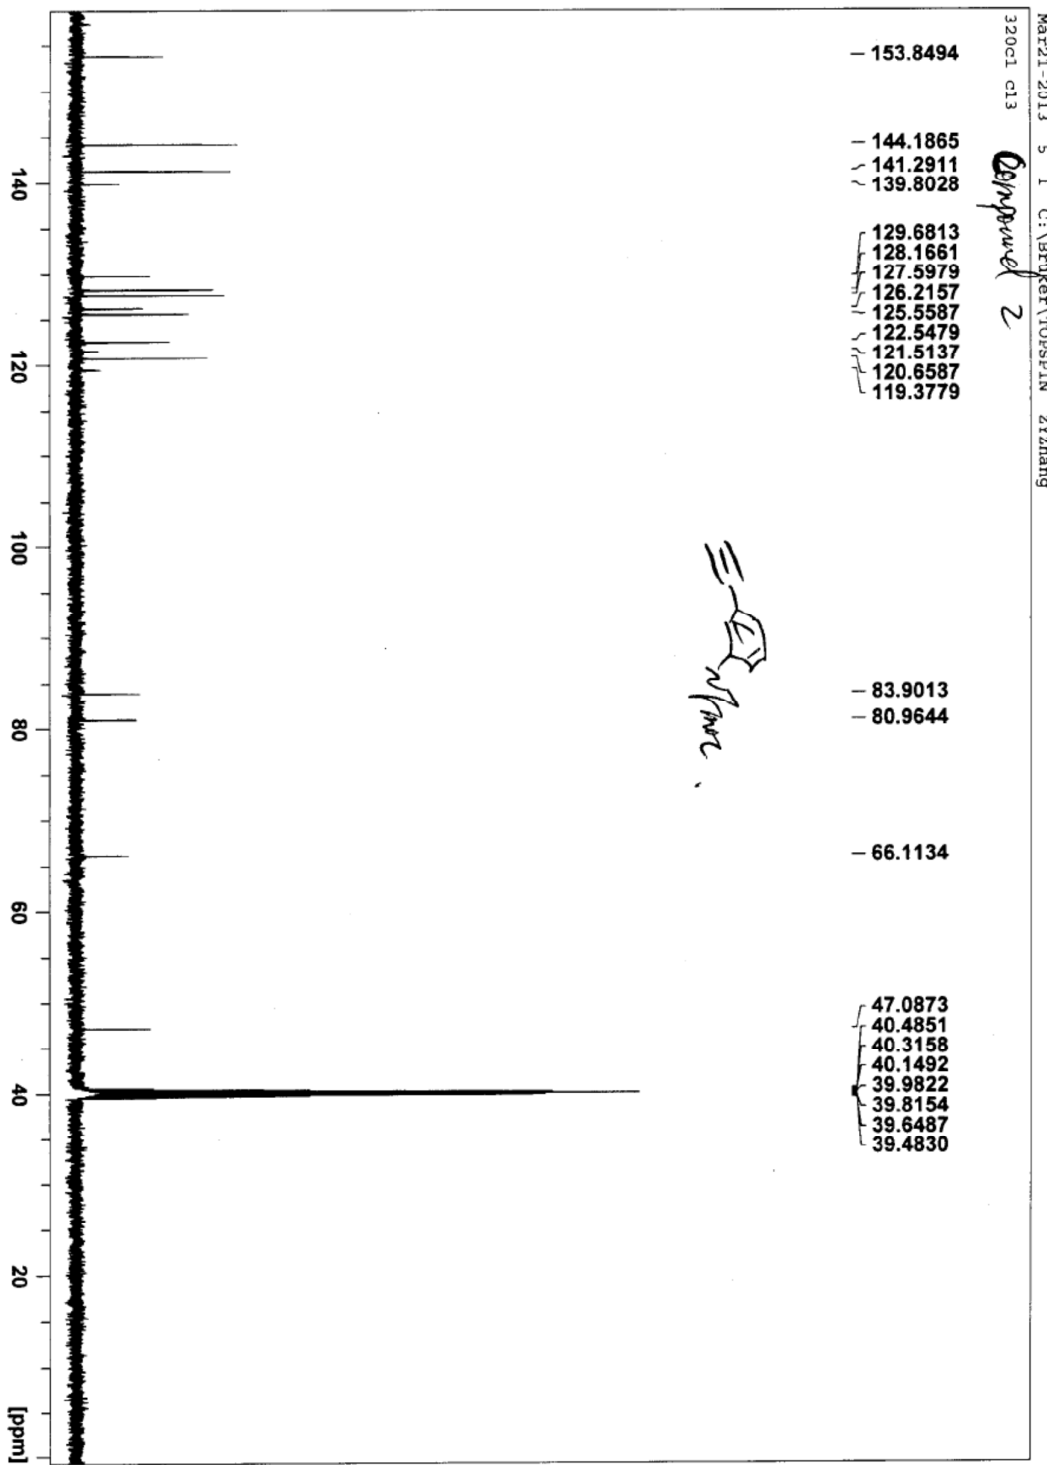

H NMR for compound 4

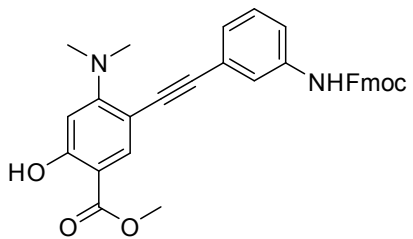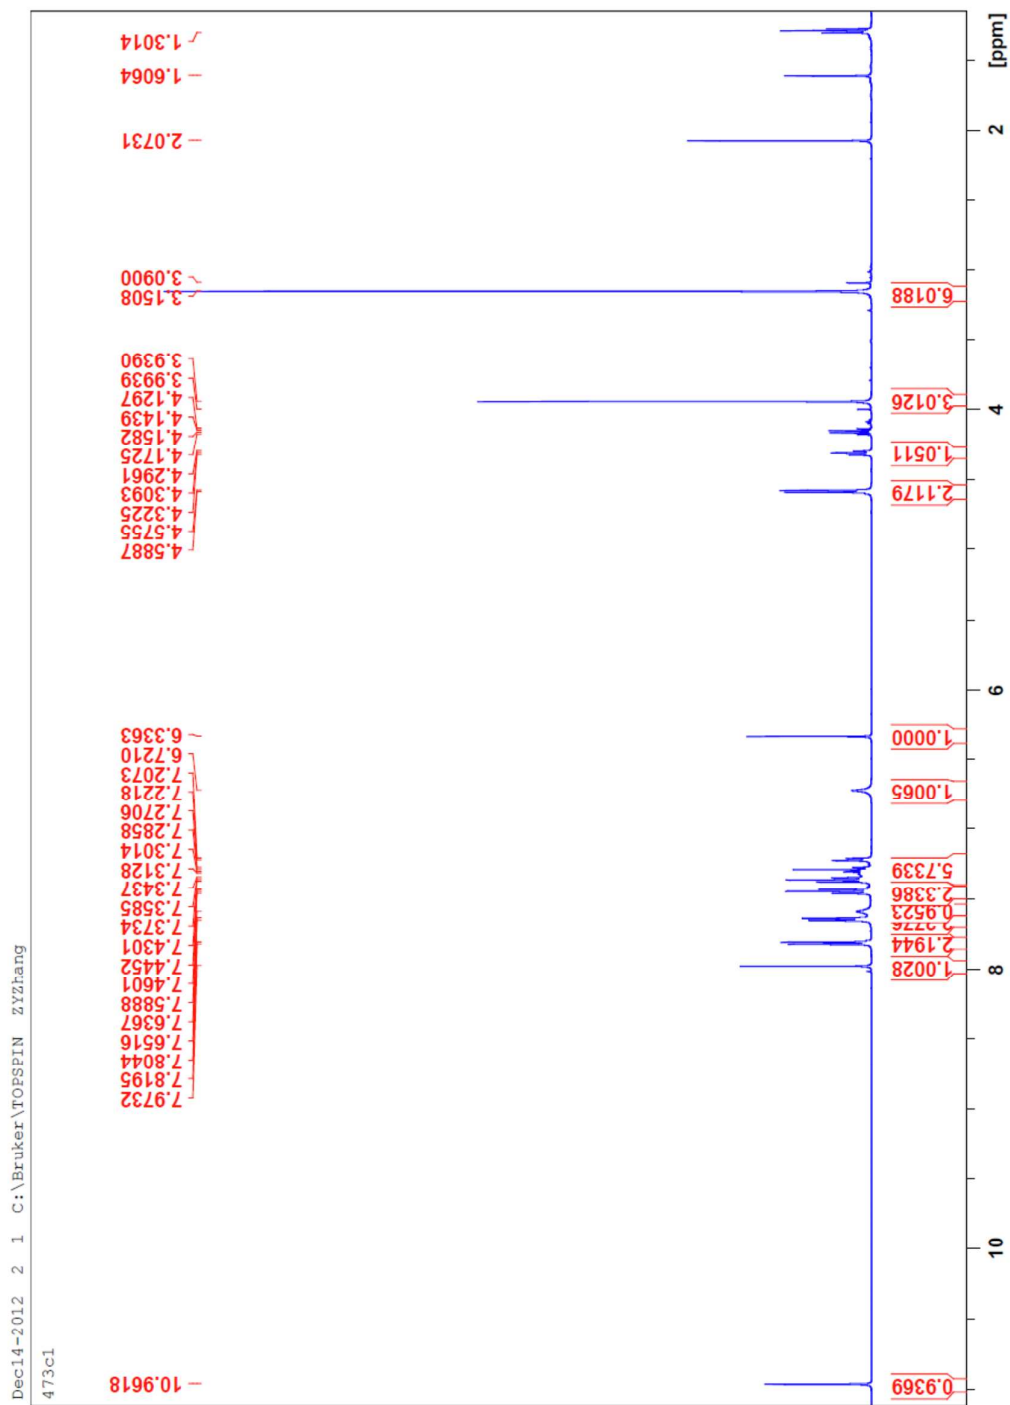



<sup>13</sup>C NMR for compound 4

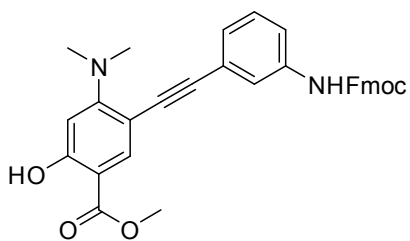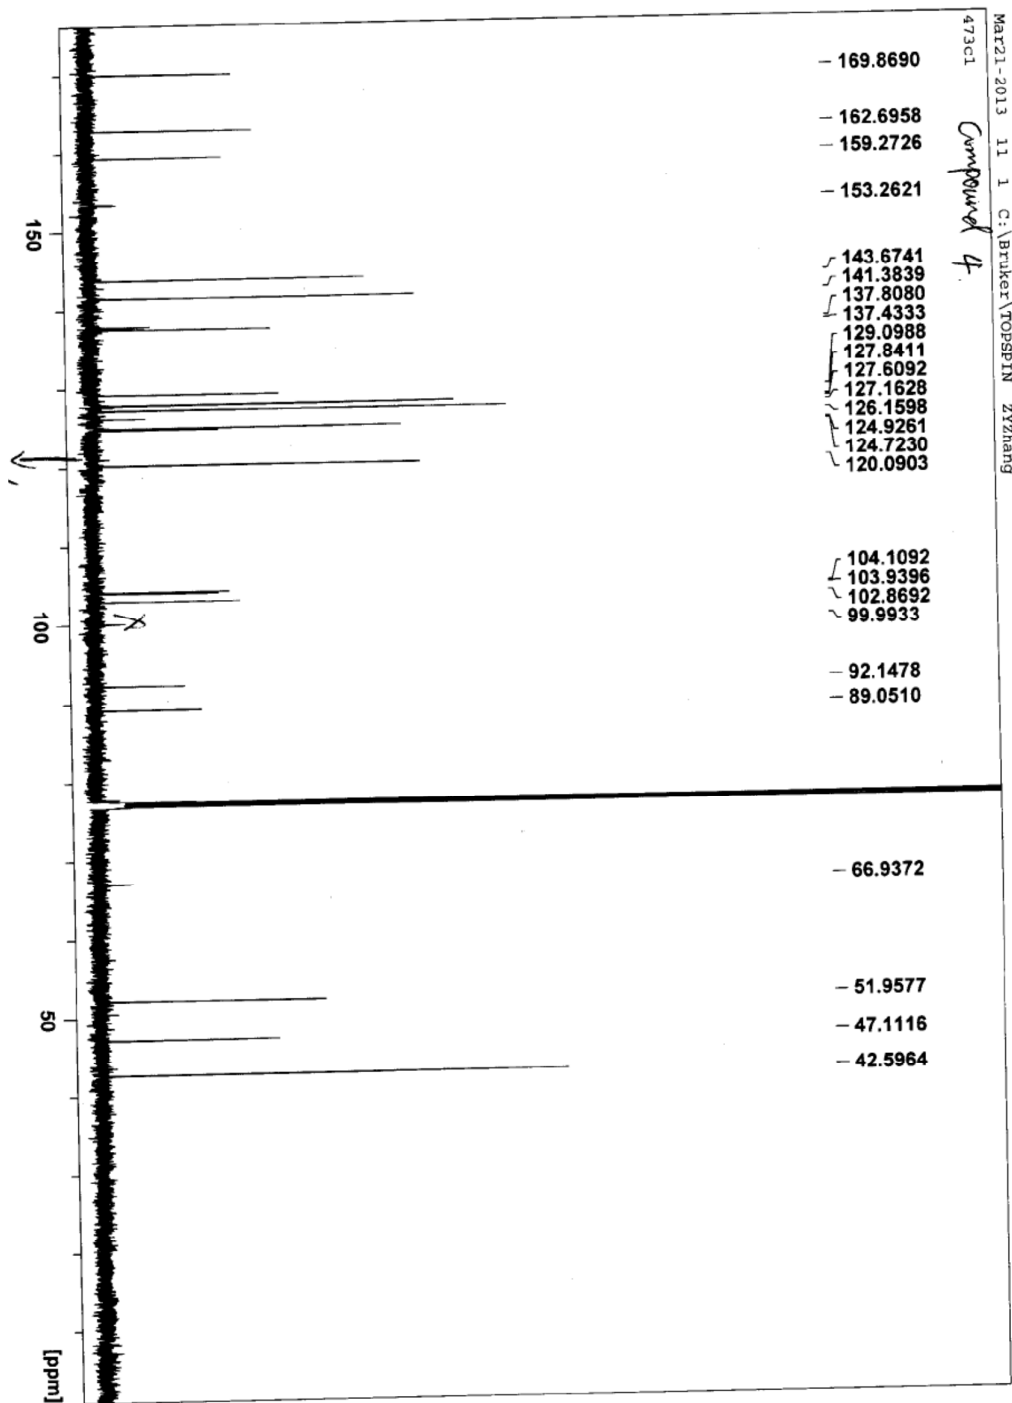

1H NMR for compound 5

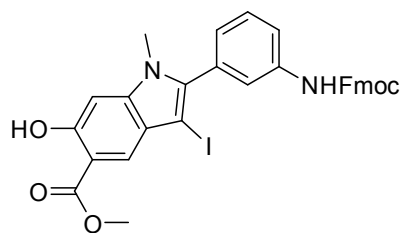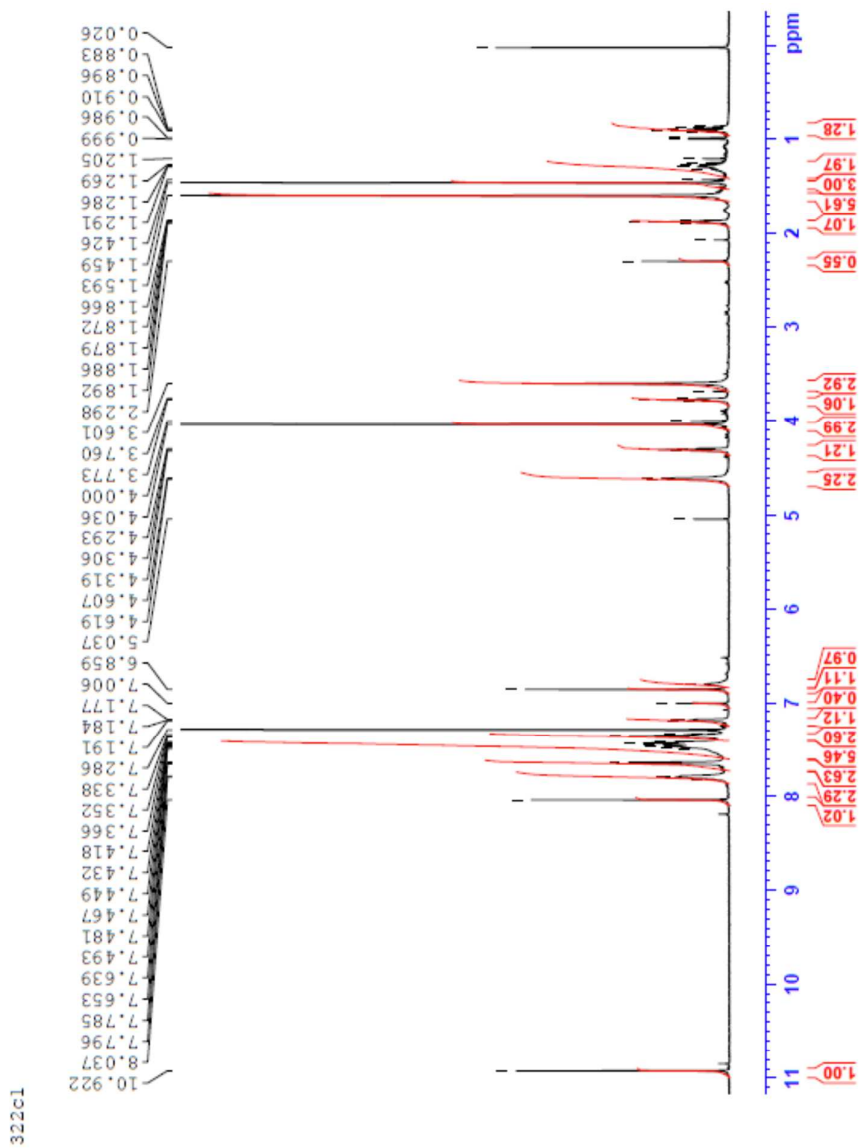

<sup>13</sup>C NMR for compound 5

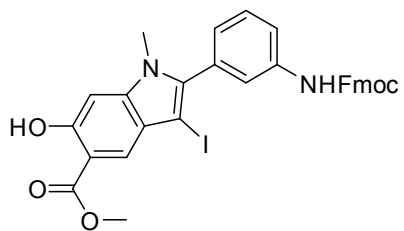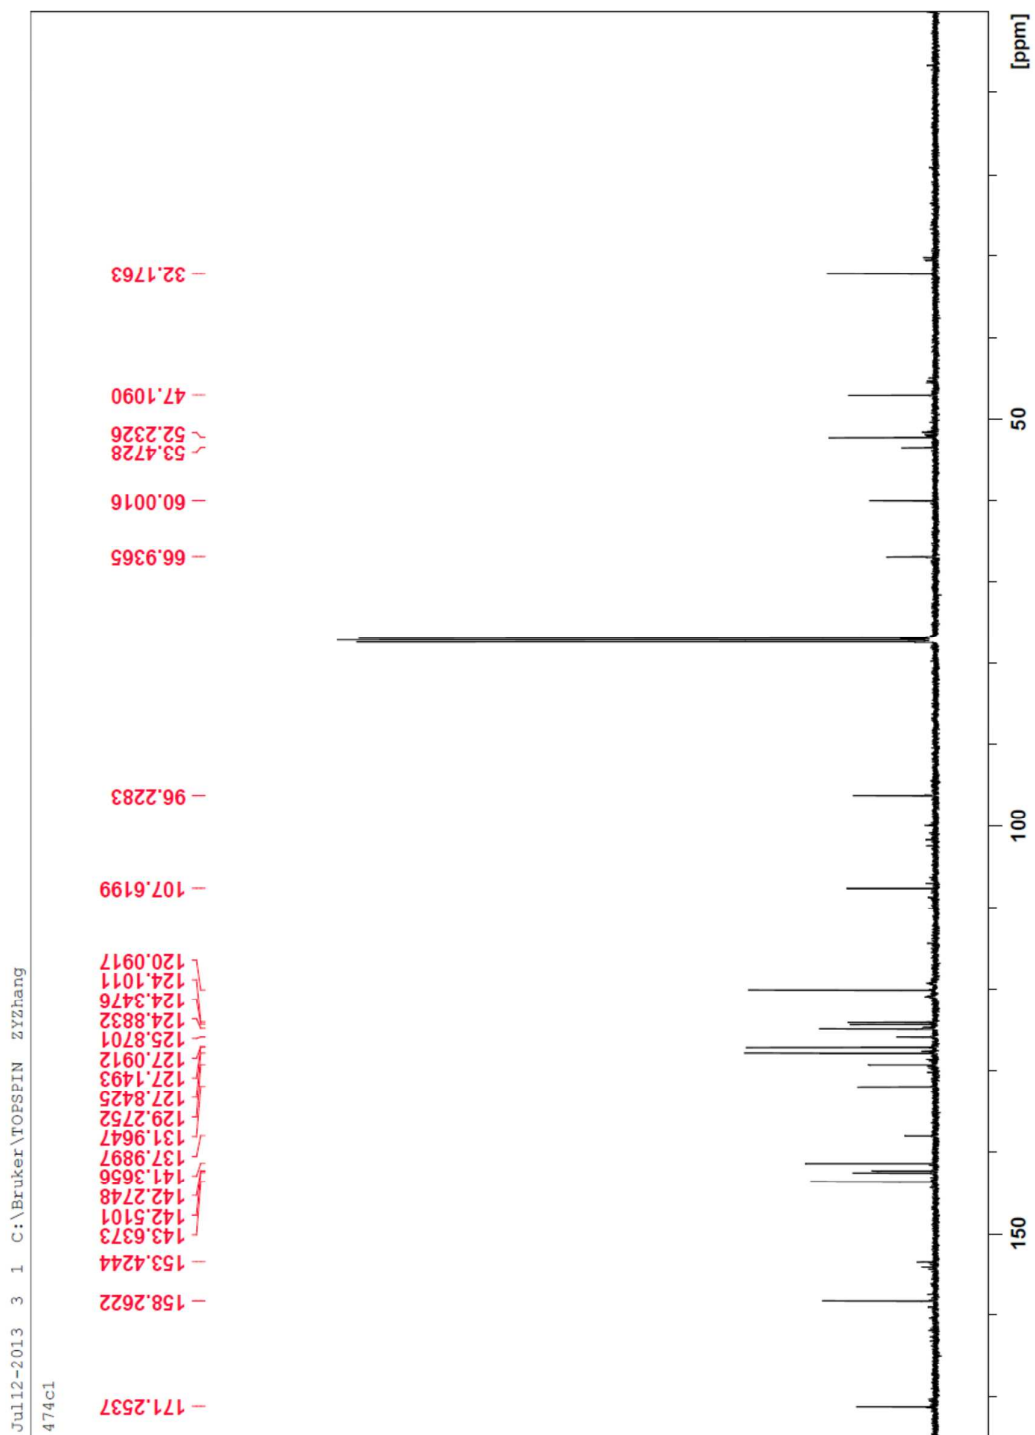

Jul12-2013 3 1 C:\Bruker\TOPSPIN ZYzhang

474c1

<sup>1</sup>H NMR for compound 6

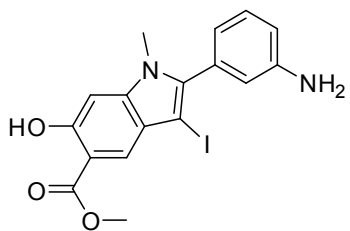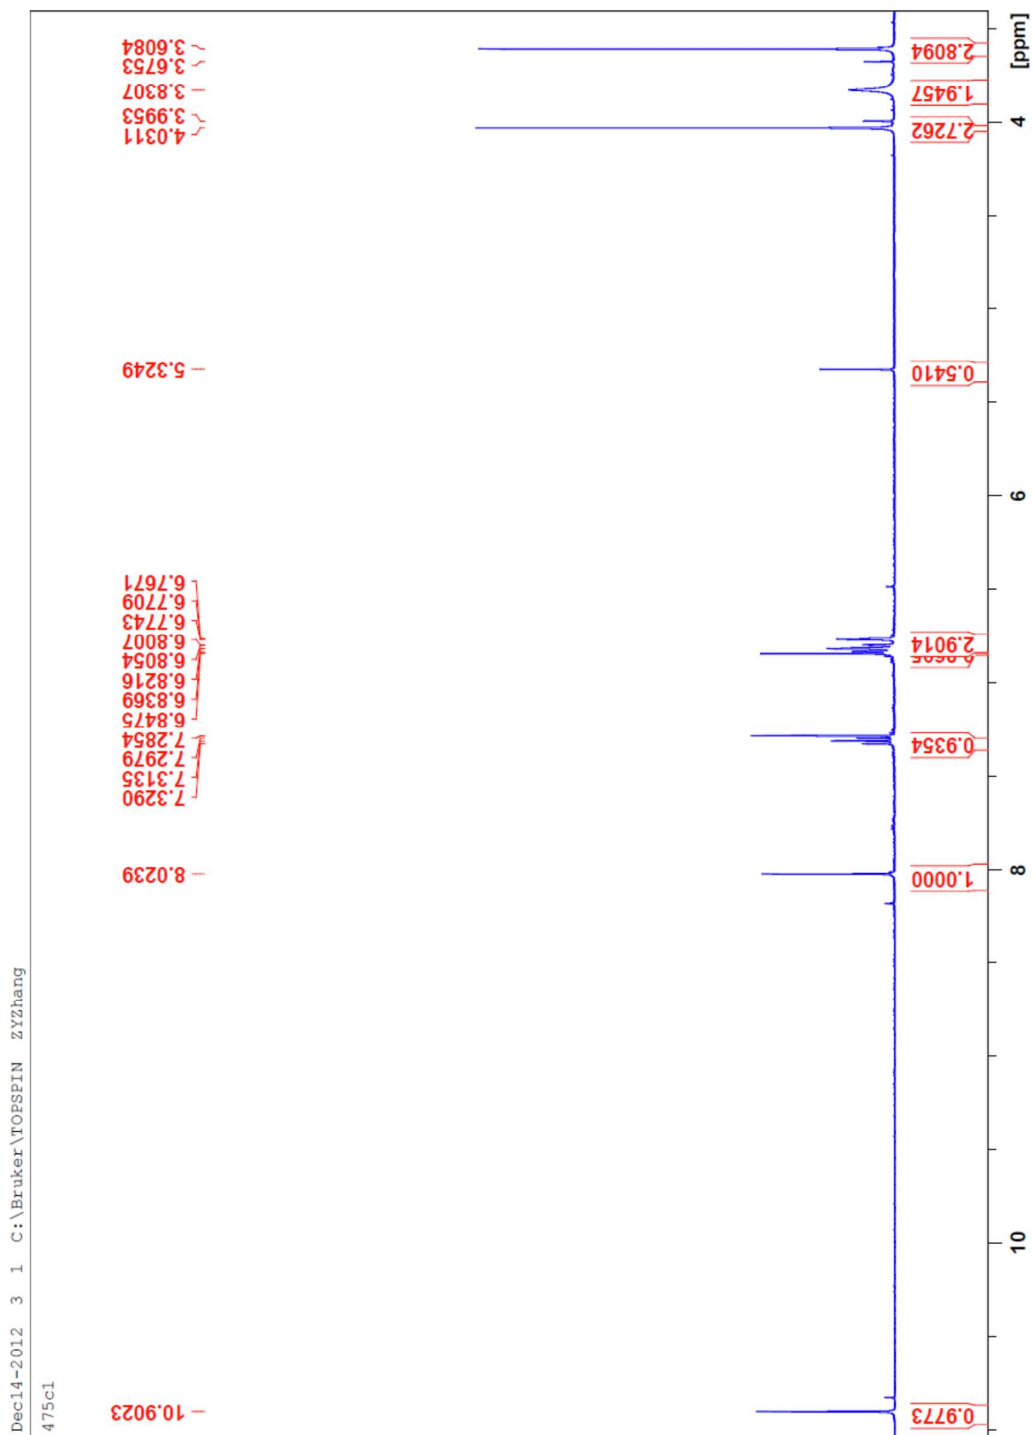

<sup>13</sup>C NMR for compound 6

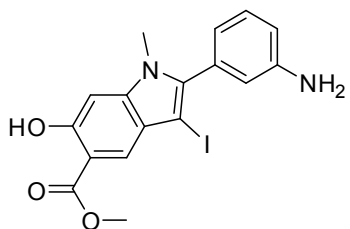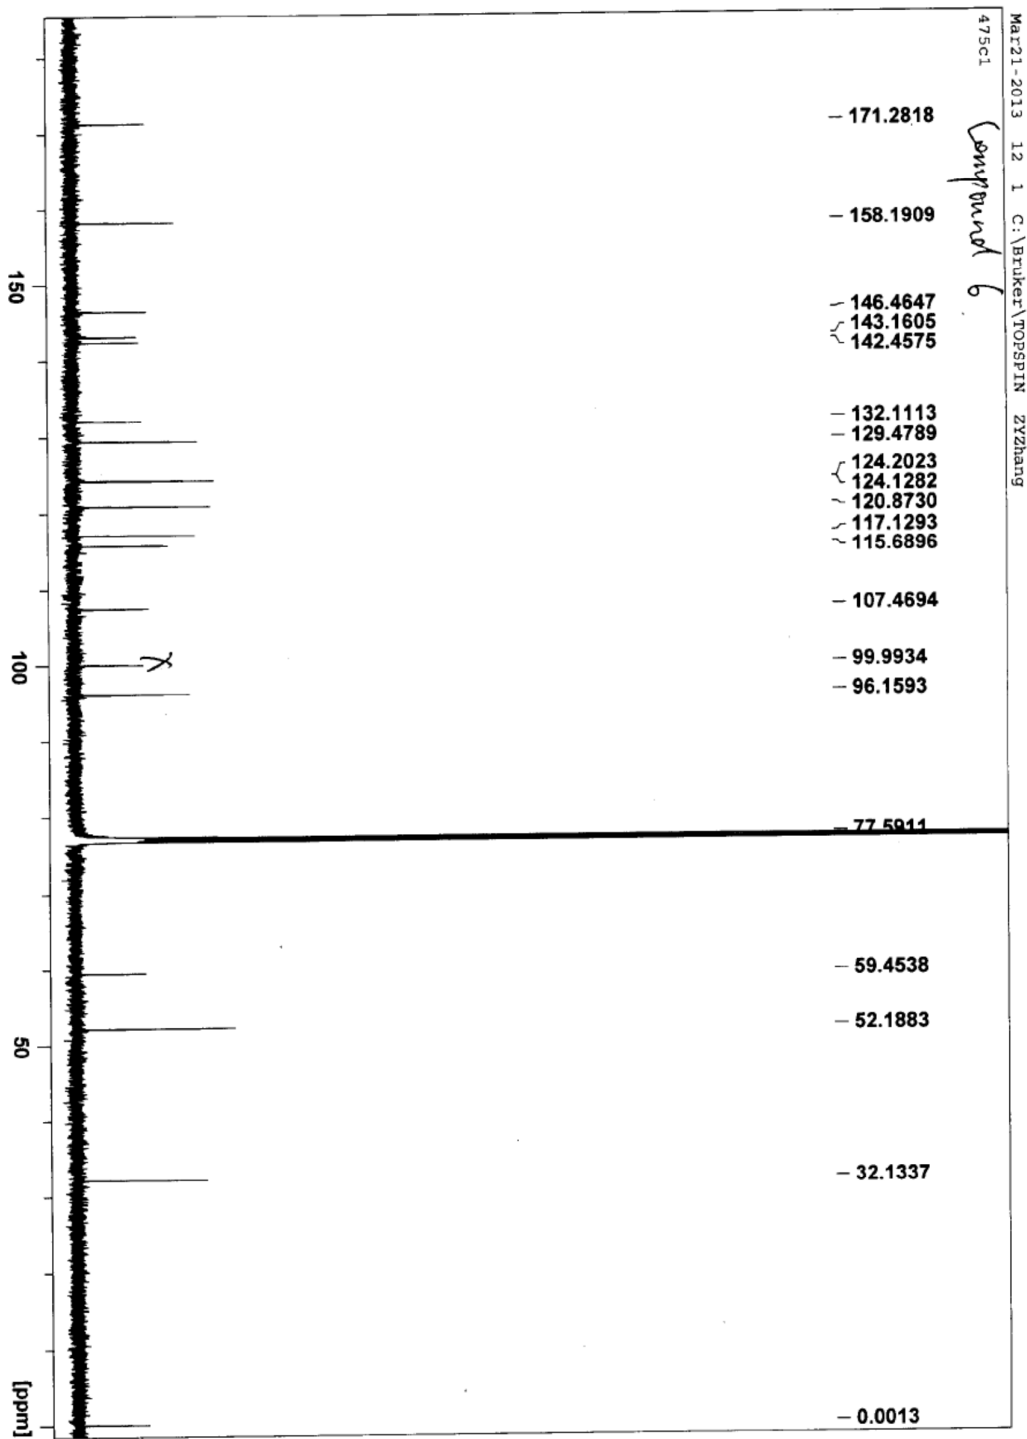

<sup>1</sup>H NMR for compound 7

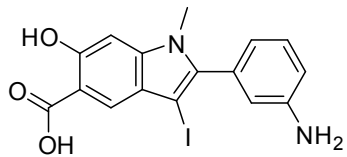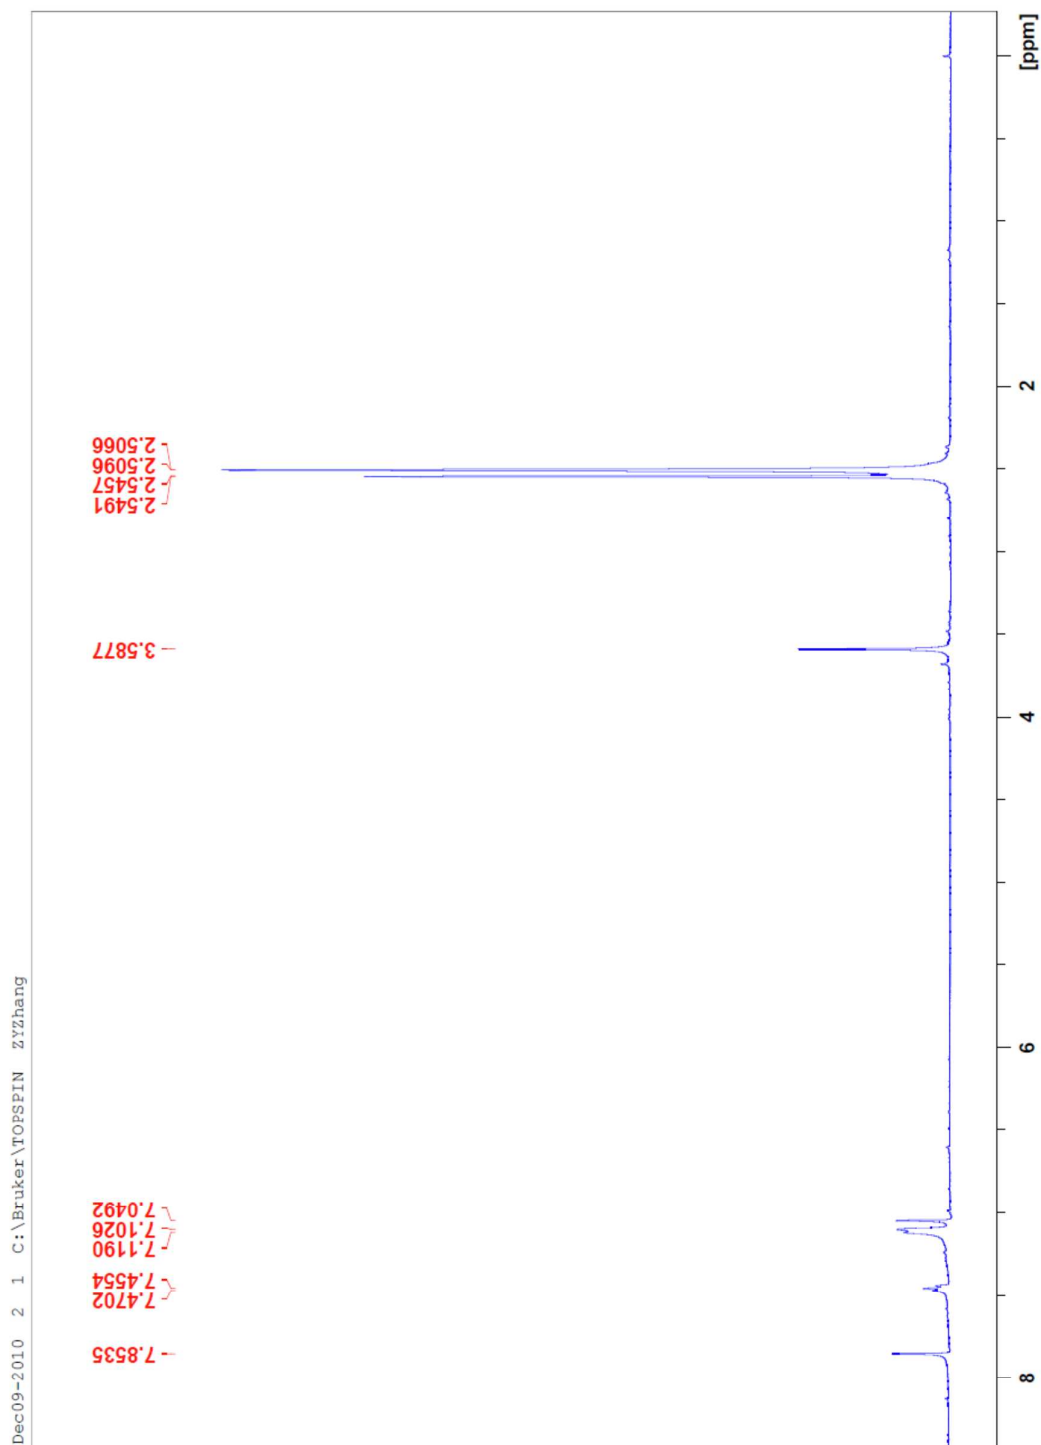

<sup>13</sup>C NMR for compound 7

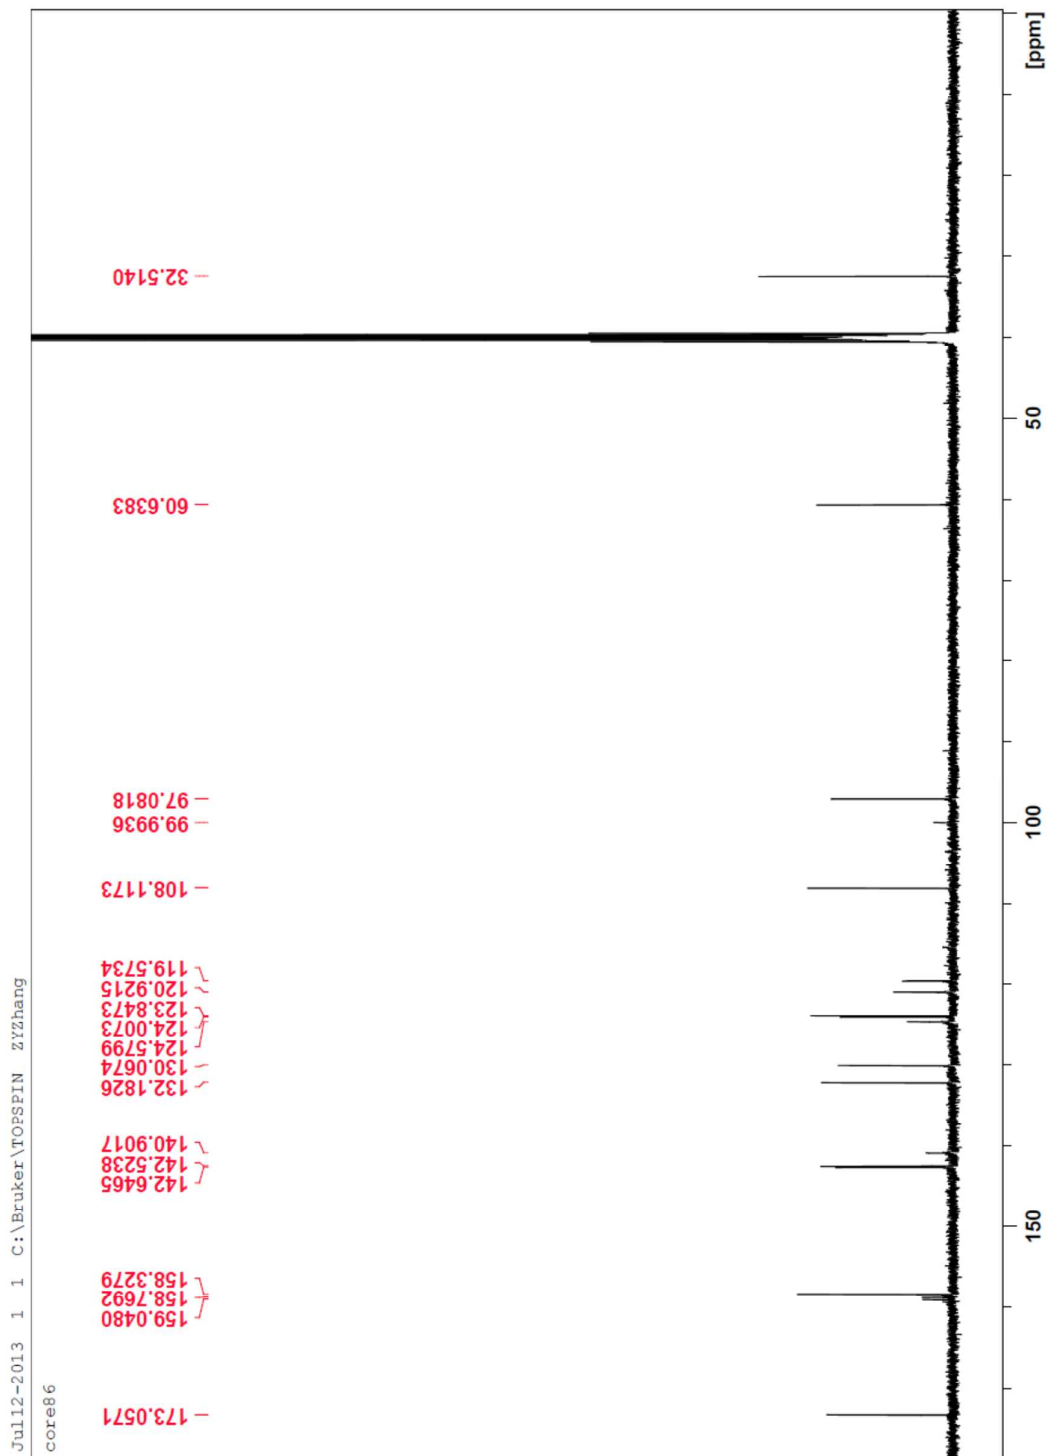

1H NMR for compound 10a

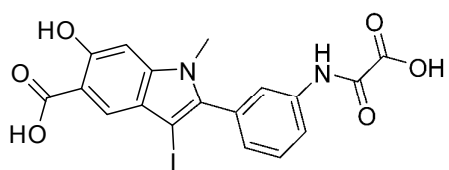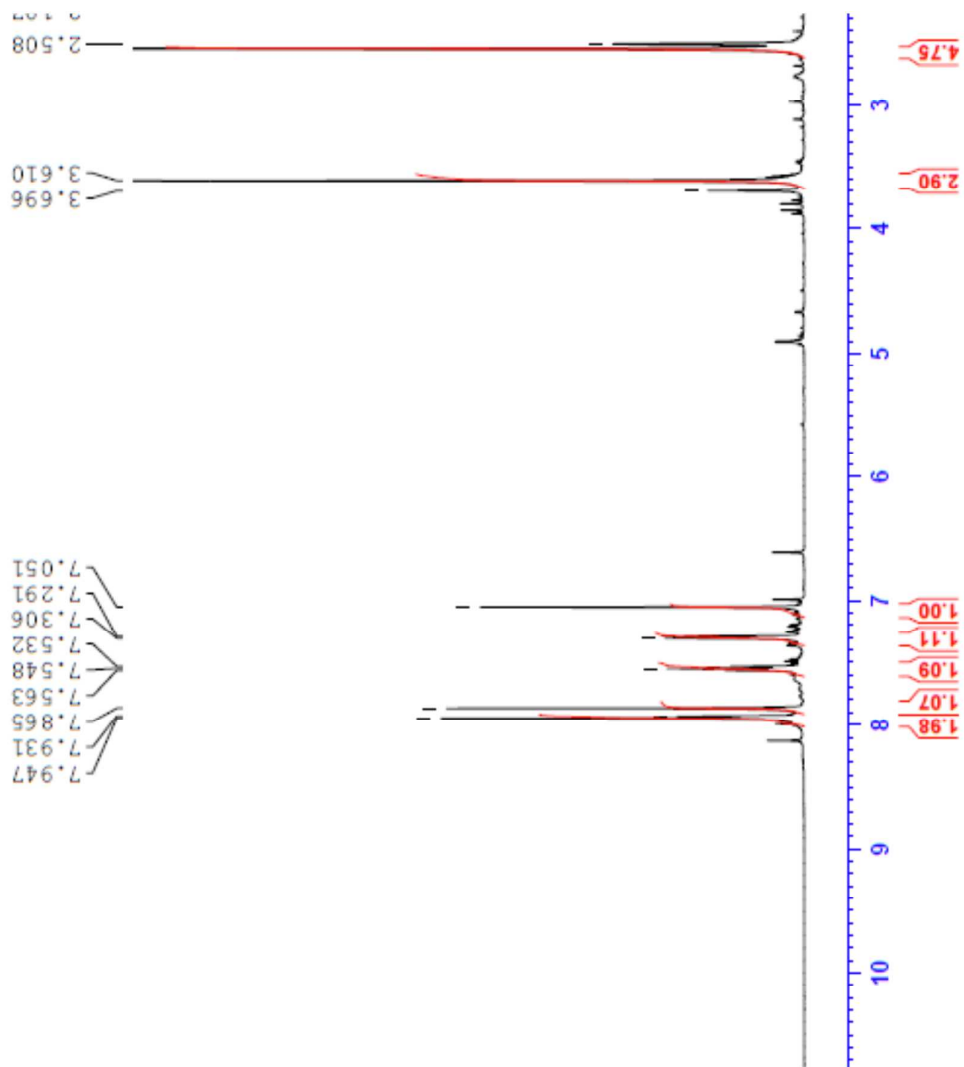



<sup>13</sup>C NMR for compound 10a

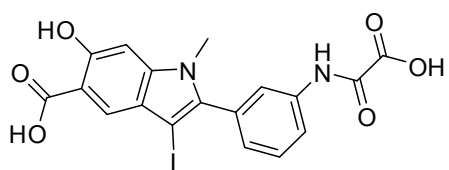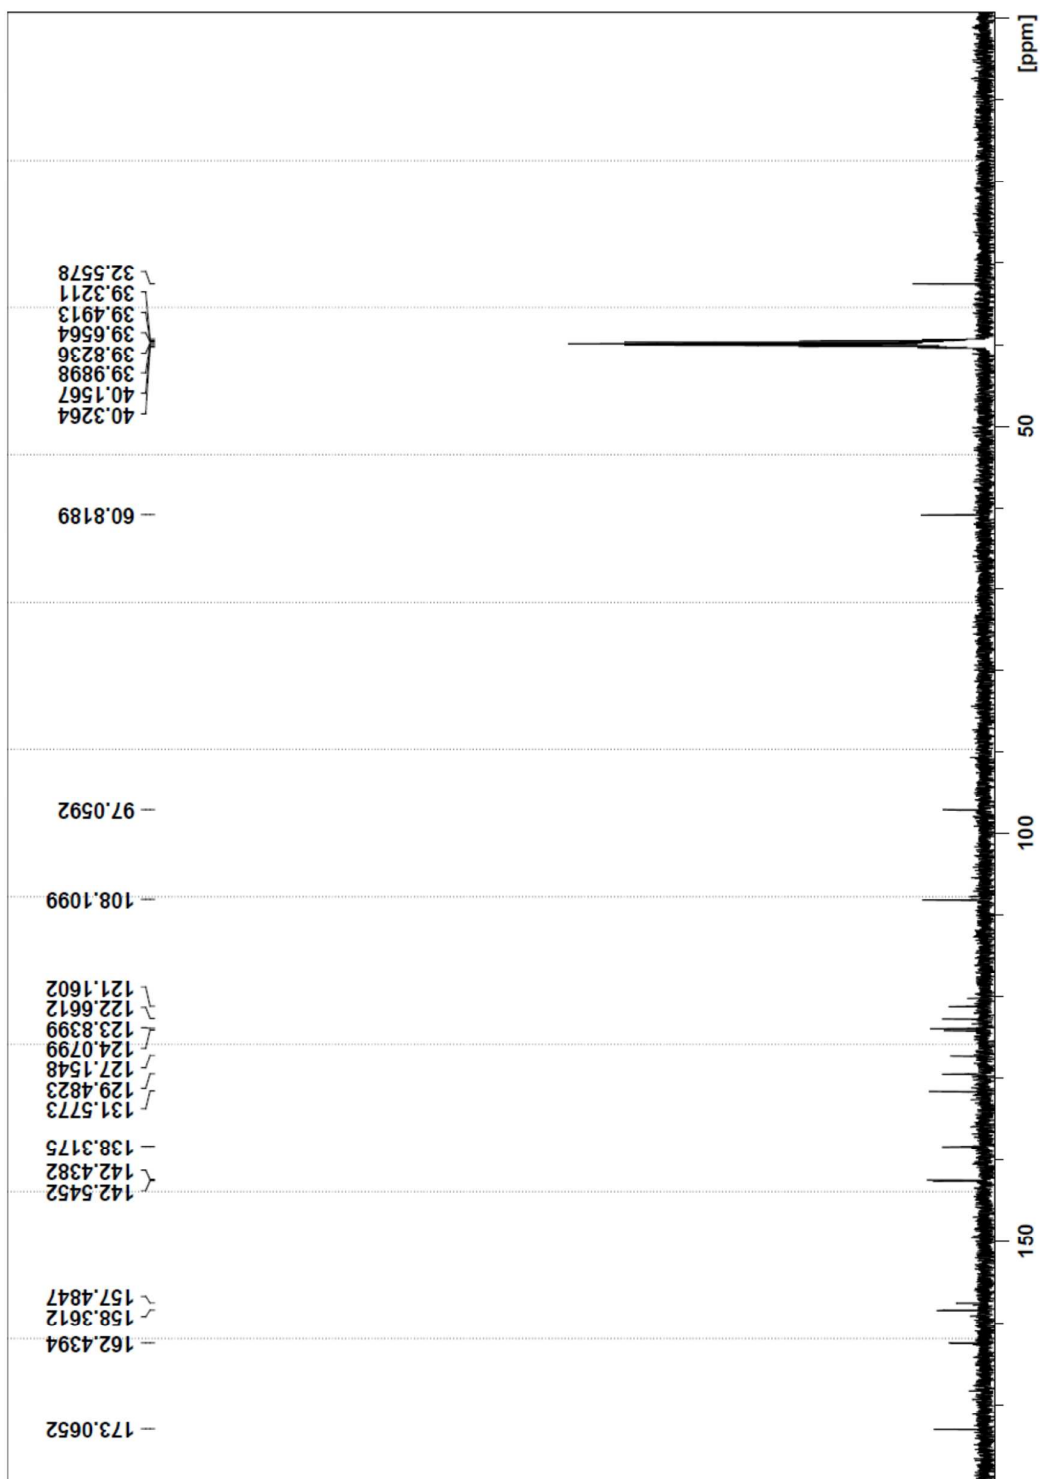

1H NMR for compound 10b

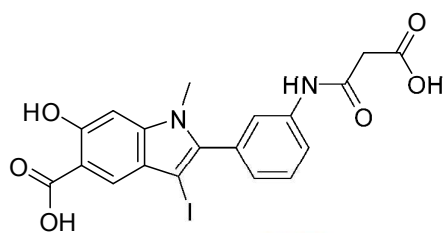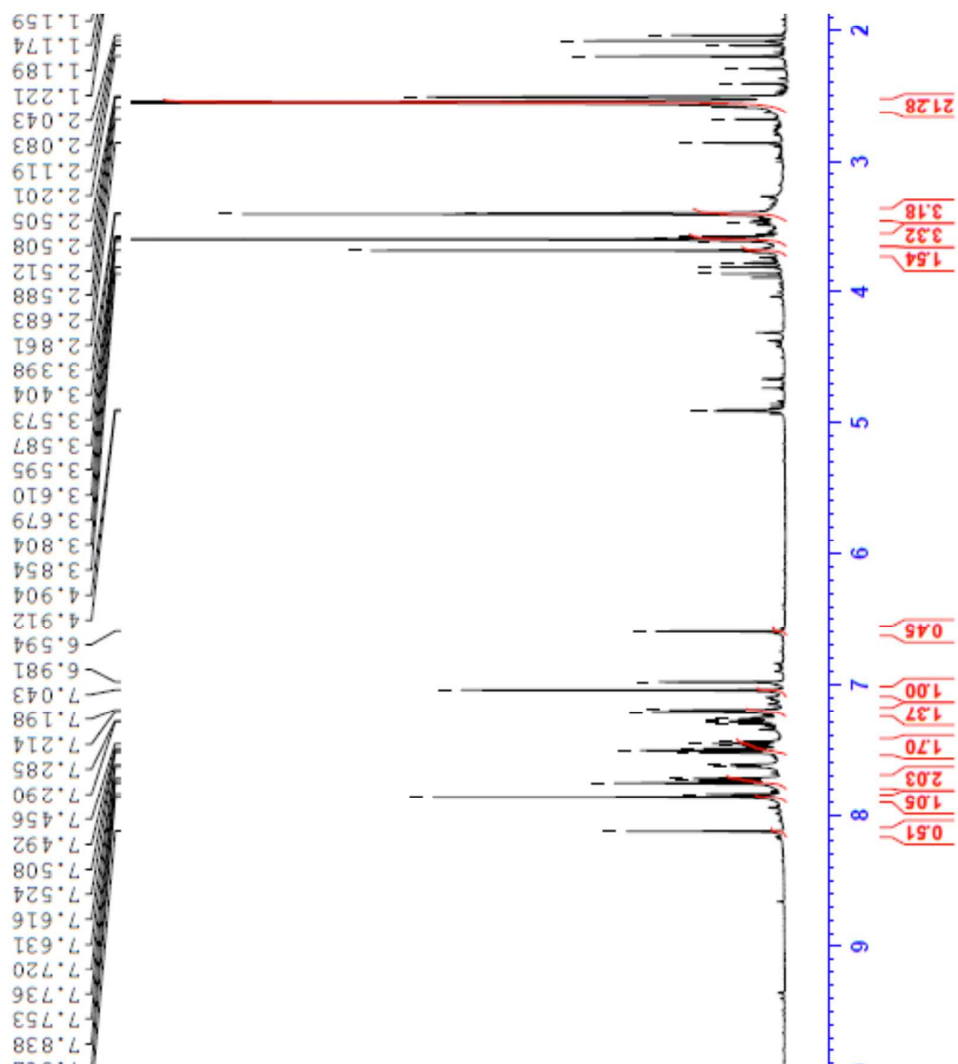

<sup>1</sup>H NMR for compound 10c

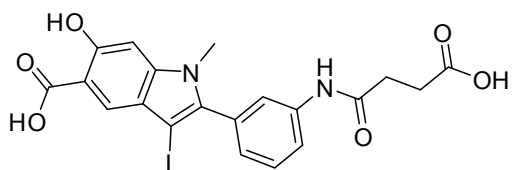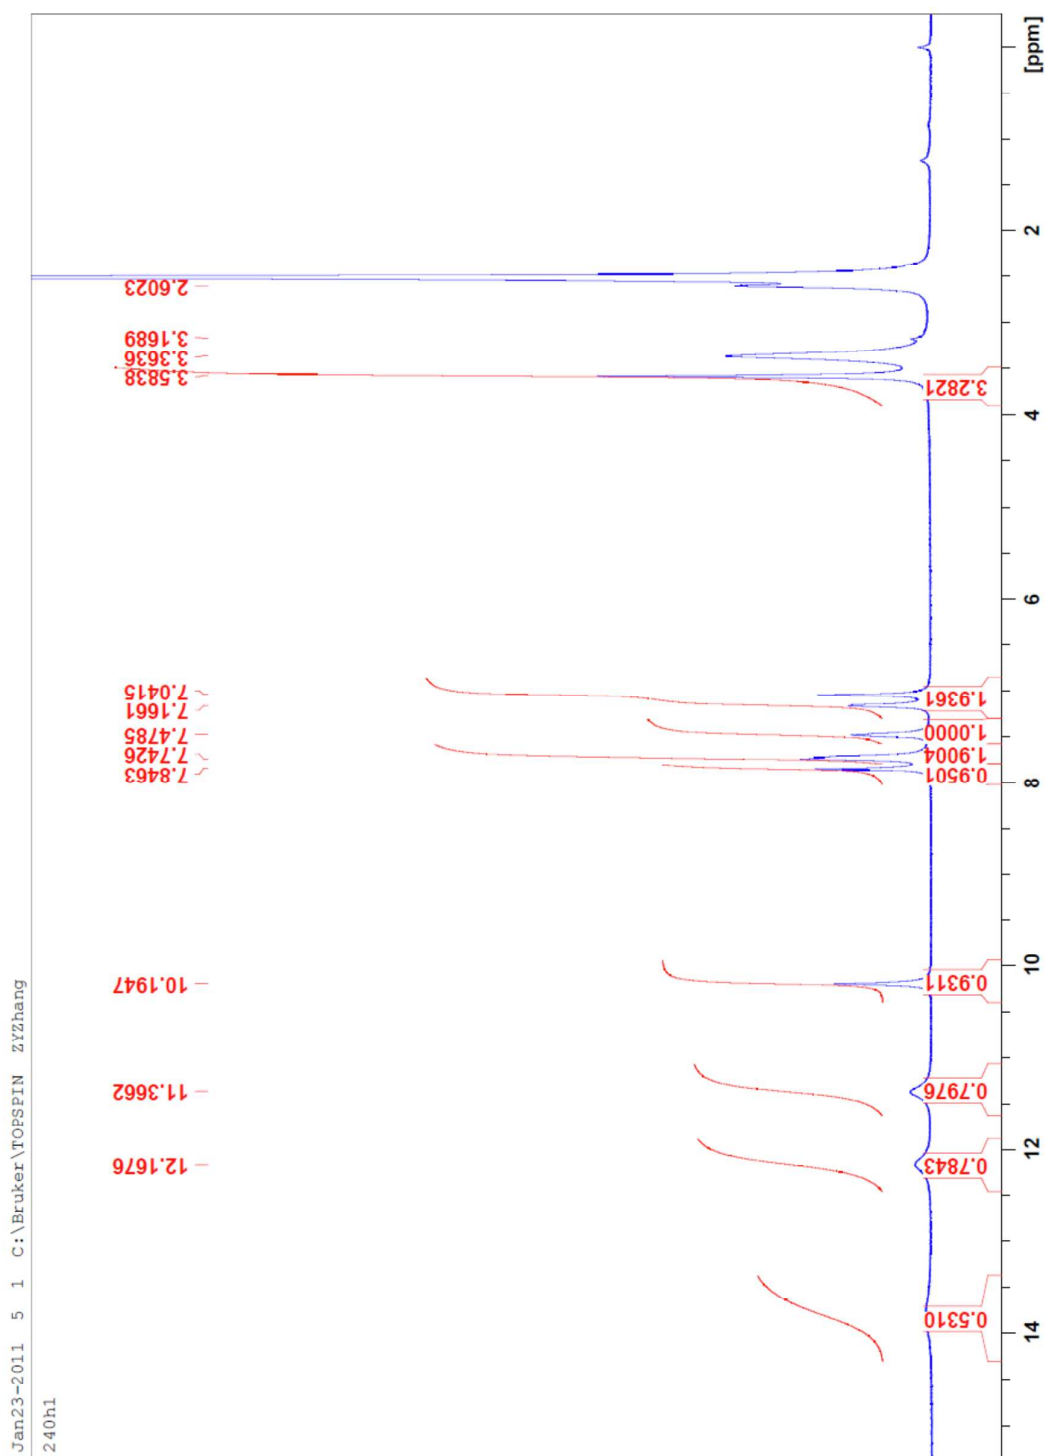

<sup>13</sup>C NMR for compound 10c

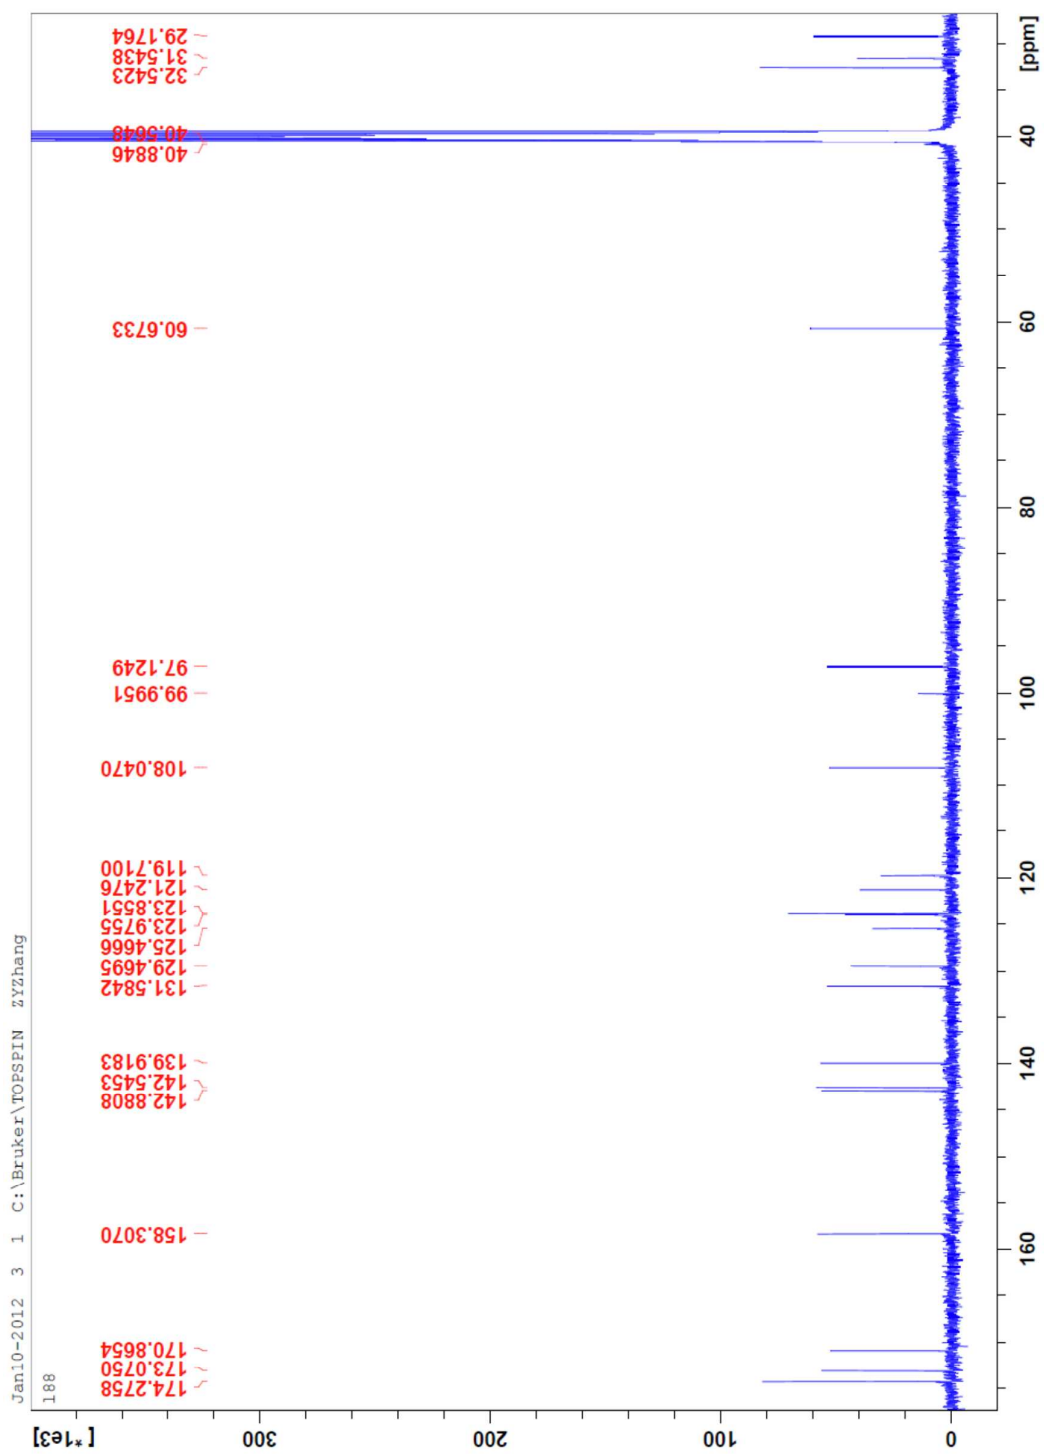

1H NMR for compound 10d

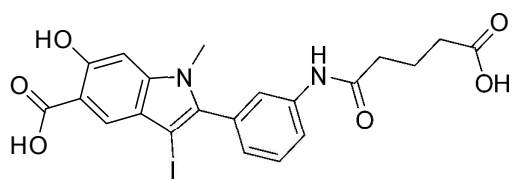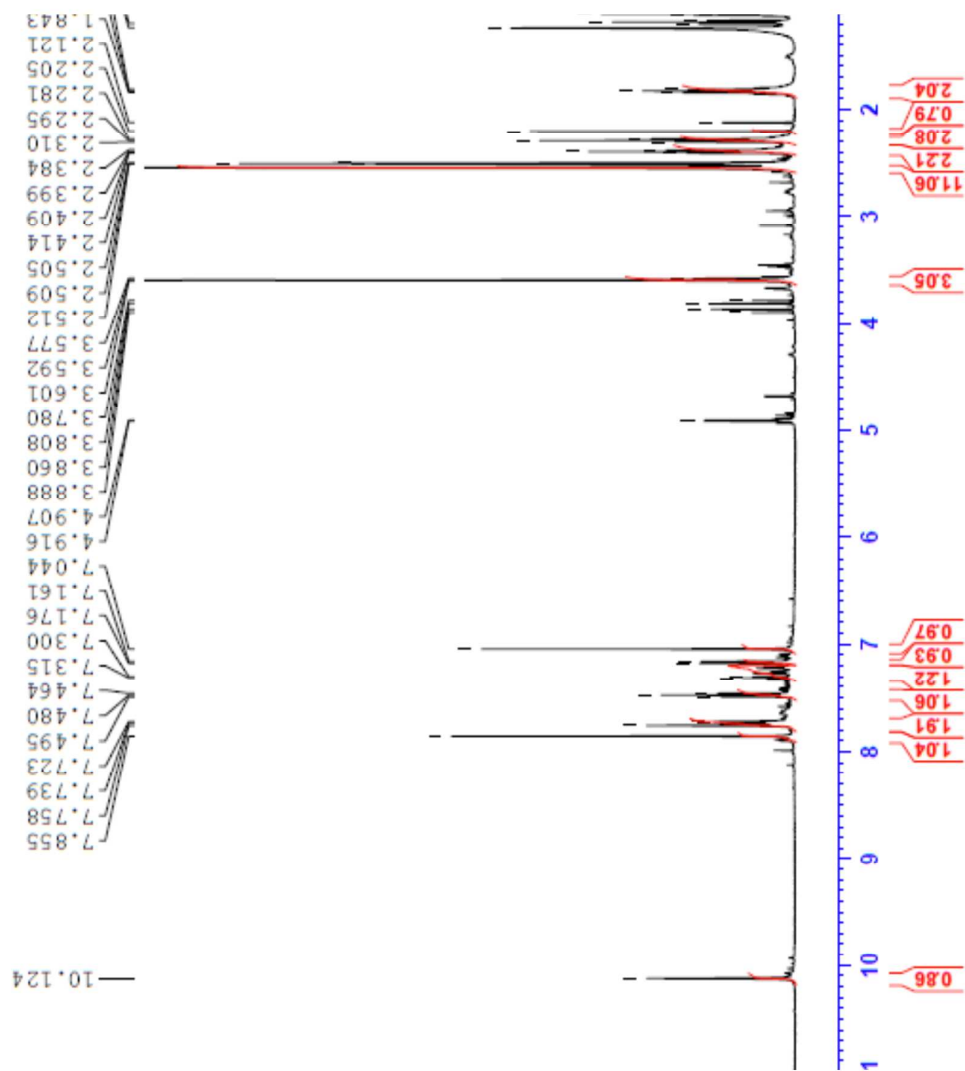

<sup>1</sup>H NMR for compound 11a-1

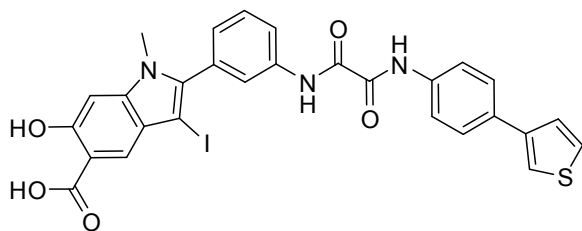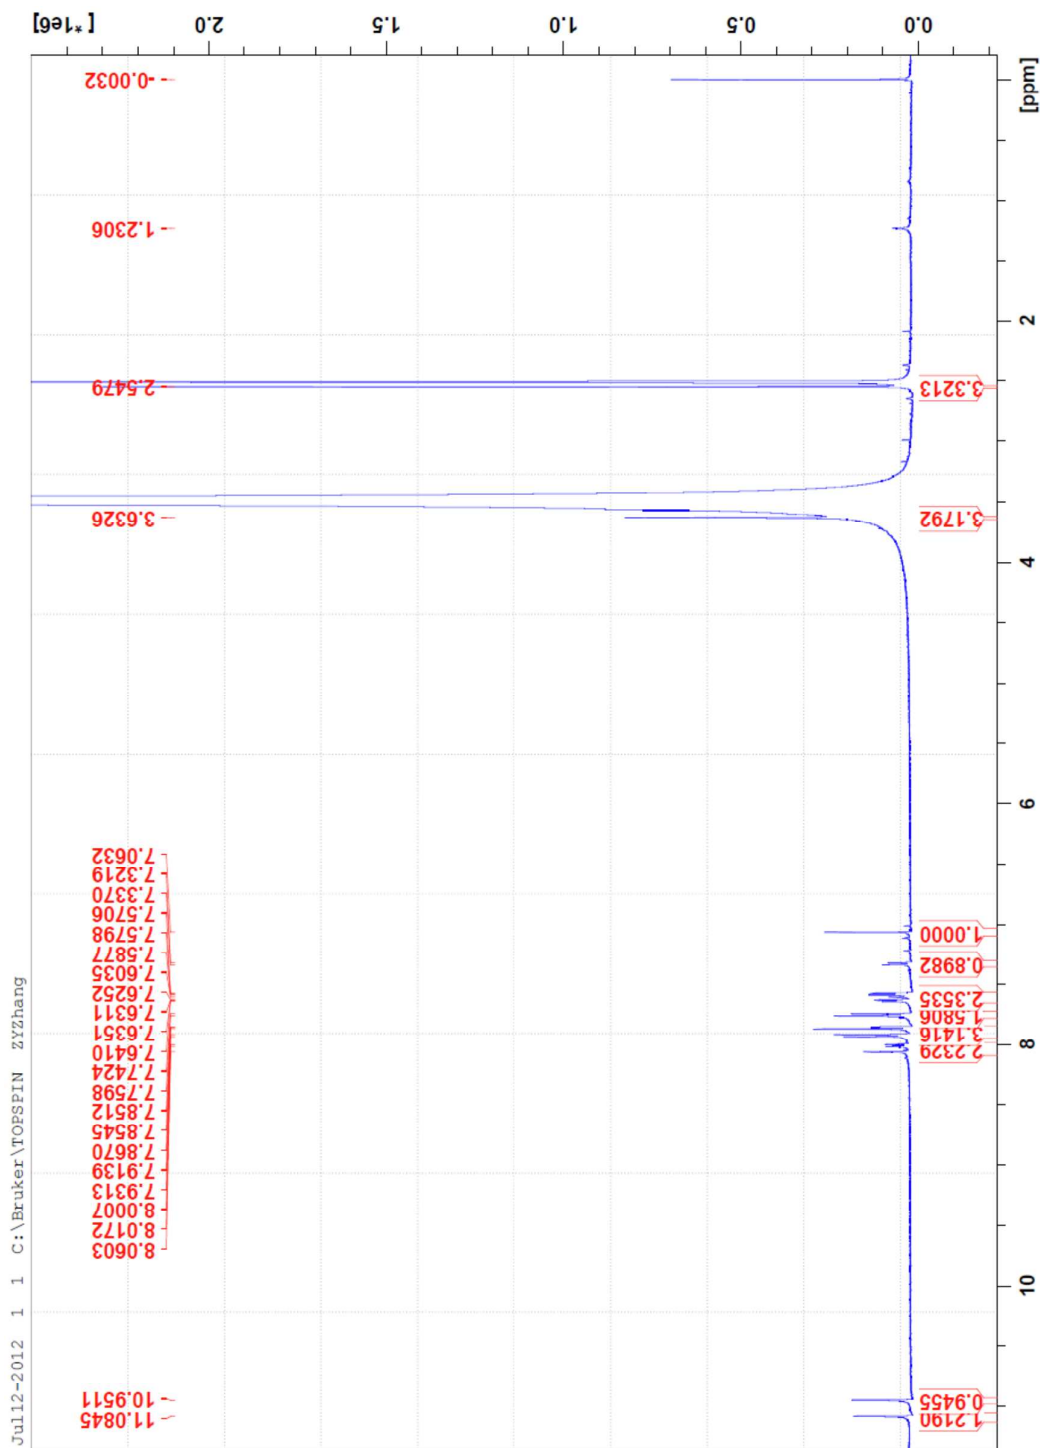

13C NMR for compound 11a-1

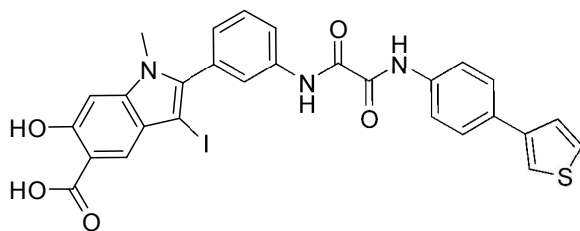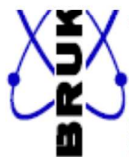

```

NAME          J1a
EXPNO         1
PROCNO        1
Date_         20110811
Time         10.00
INSTRUM       spect
PROBHD        5 mm P
PULPROG       zgpg30
SOLVENT       DMSO
NS            2048
DS            4
SWH           12500.000
FIDRES       0.18000000
AQ           0.20000000
RG           655.36
DW           0.00000000
DE           0.00000000
TE           300.2
D1           2.00000000
D11          0.05000000
TD0          65536
===== CHANNEL f1 =====
NUC1          13C
P1           12.00
PL1          0.00
SFO1         100.625
SF01         125.130
===== CHANNEL f2 =====
CEDEPRG2     zgpg30
NUC2          13C
PCPD2        12.00
P2           12.00
PL2          0.00
P12         25.00
PL12        0.00
P13         25.00
PL13        0.00
P14         25.00
PL14        0.00
SFO2         500.136
SI           125
SF           125
PC           12.00
=====
  
```

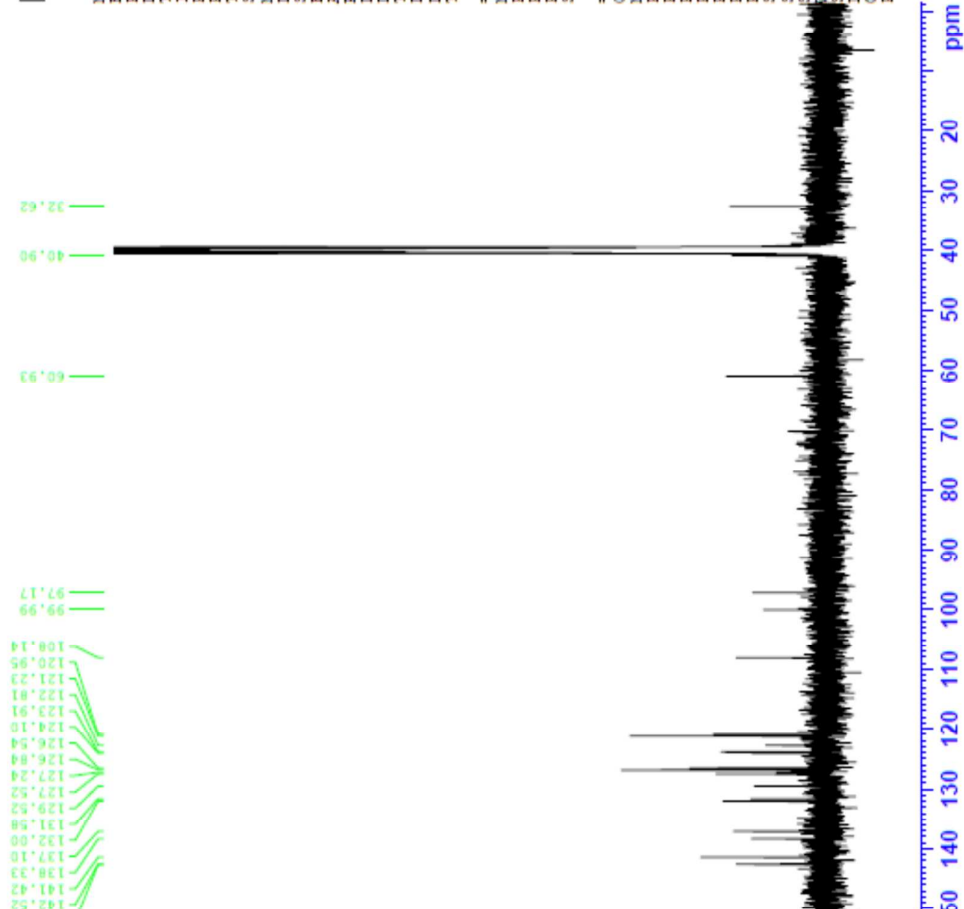

142.52  
 141.42  
 138.33  
 137.10  
 132.00  
 131.58  
 129.52  
 127.52  
 127.24  
 126.84  
 126.54  
 124.10  
 123.91  
 122.81  
 121.23  
 120.95  
 108.14  
 99.99  
 97.17  
 60.93  
 40.96  
 32.62

50 140 130 110 100 90 80 70 60 50 40 30 20 ppm

<sup>1</sup>H NMR for compound 11a-2

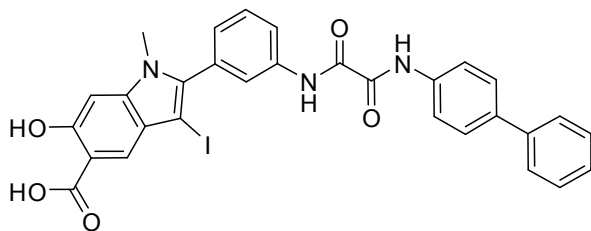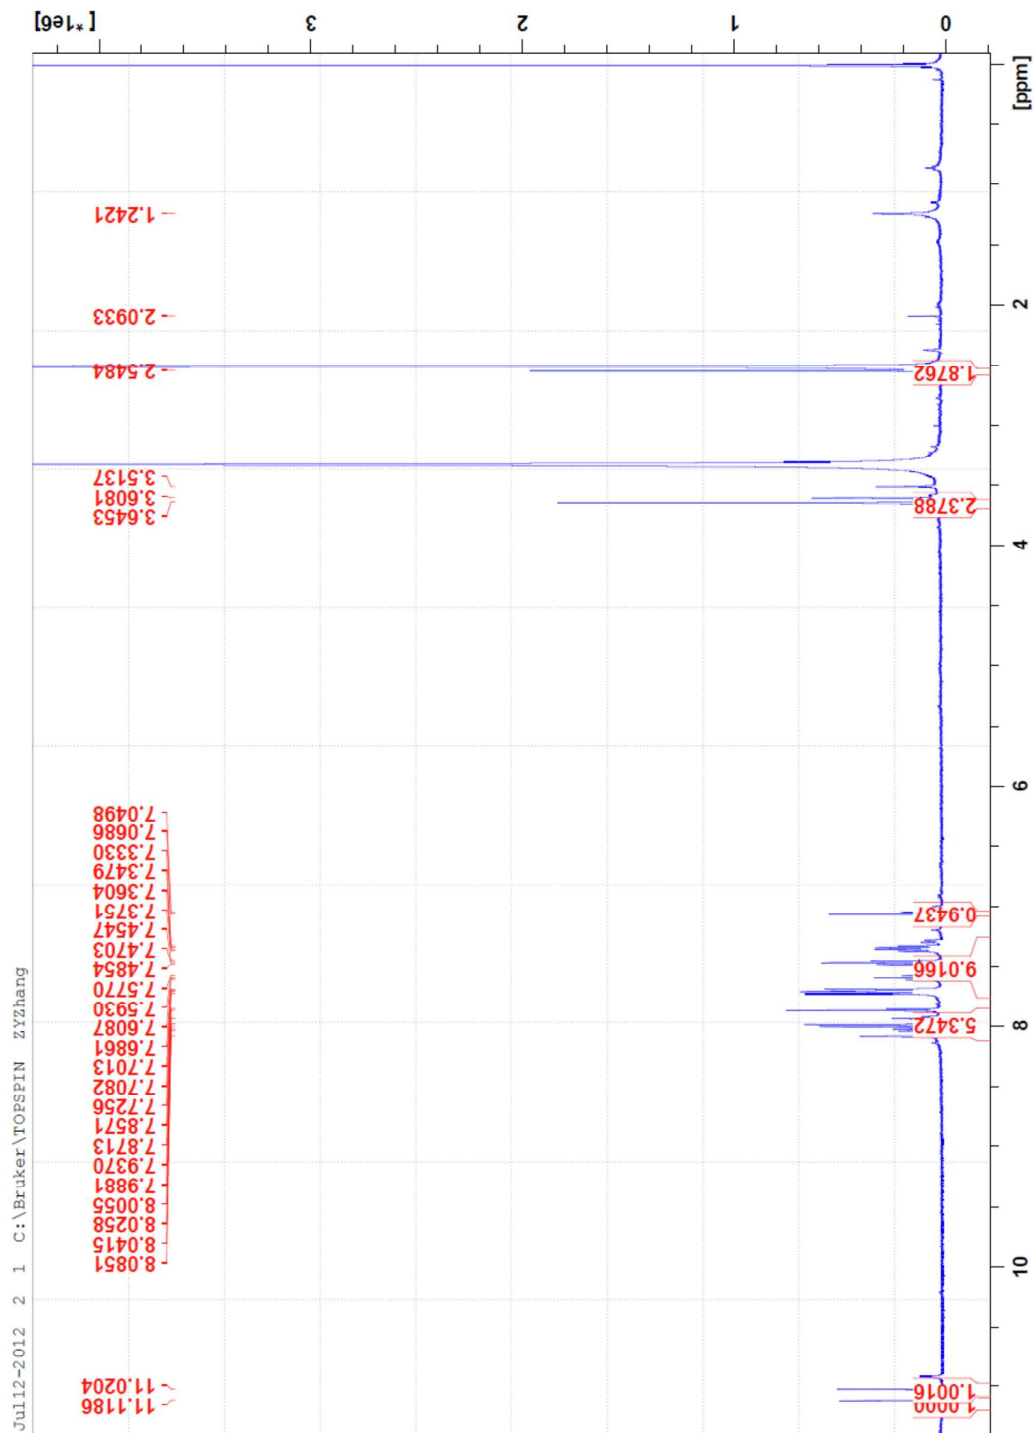



<sup>1</sup>H NMR for compound 11a-3

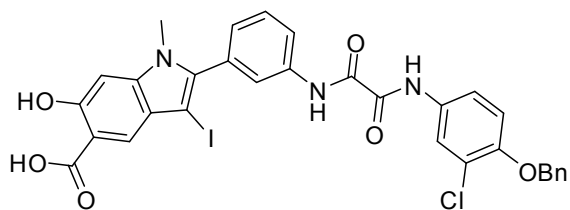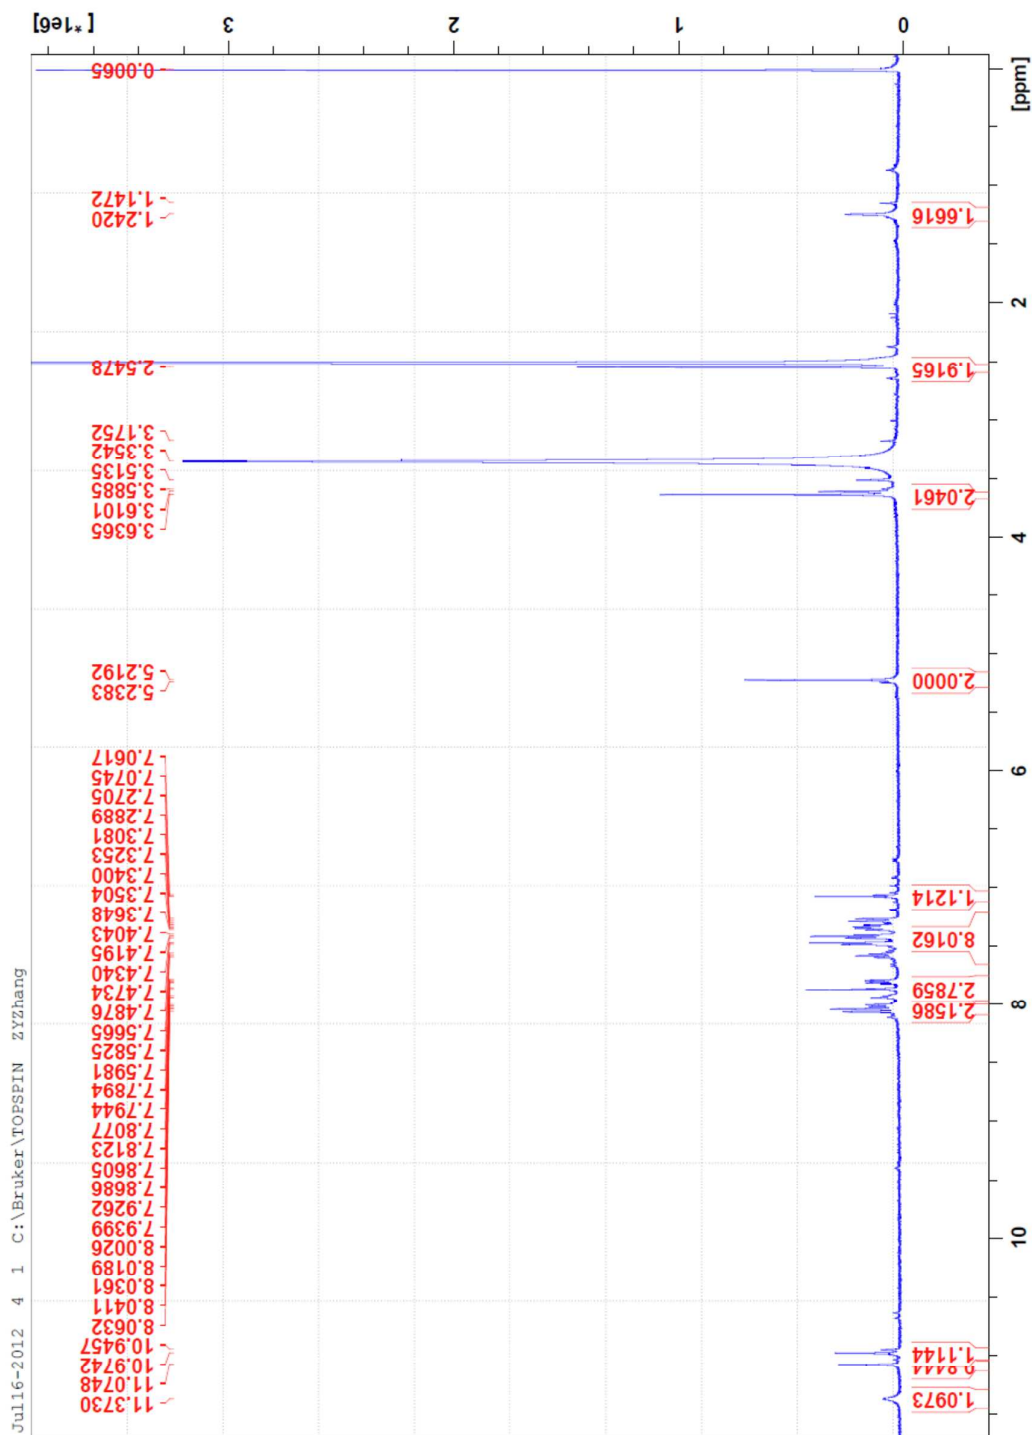

1H NMR for compound 11a-4

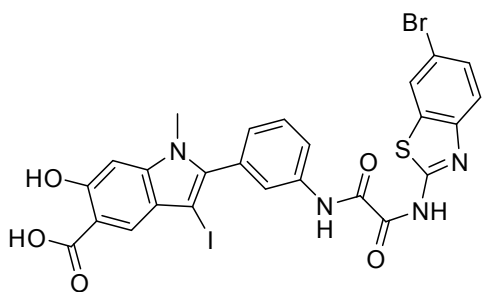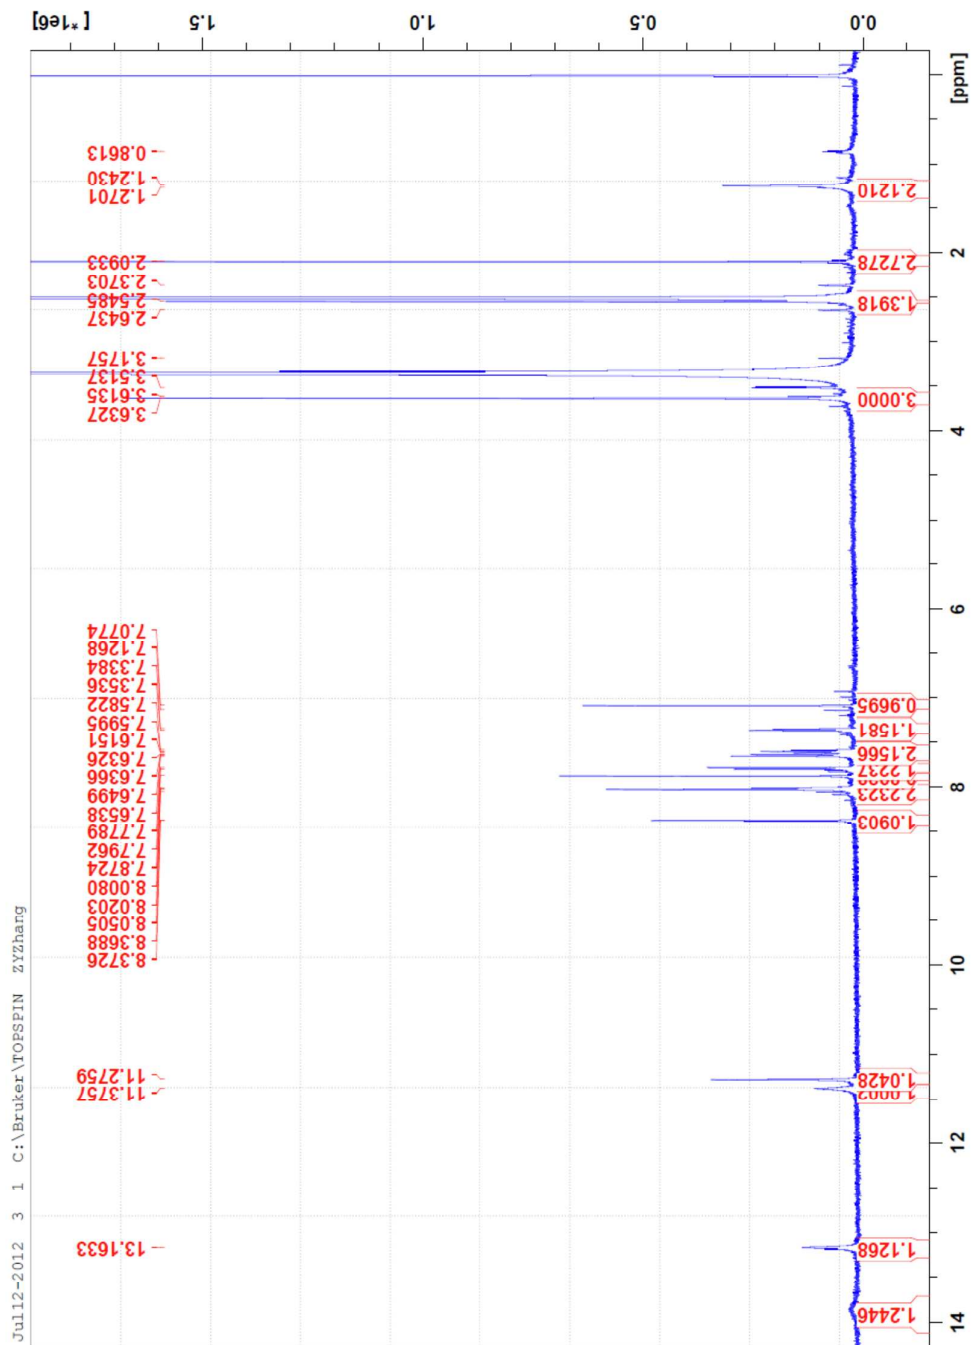

1H NMR for compound 11a-5

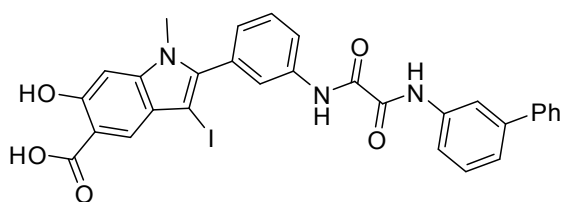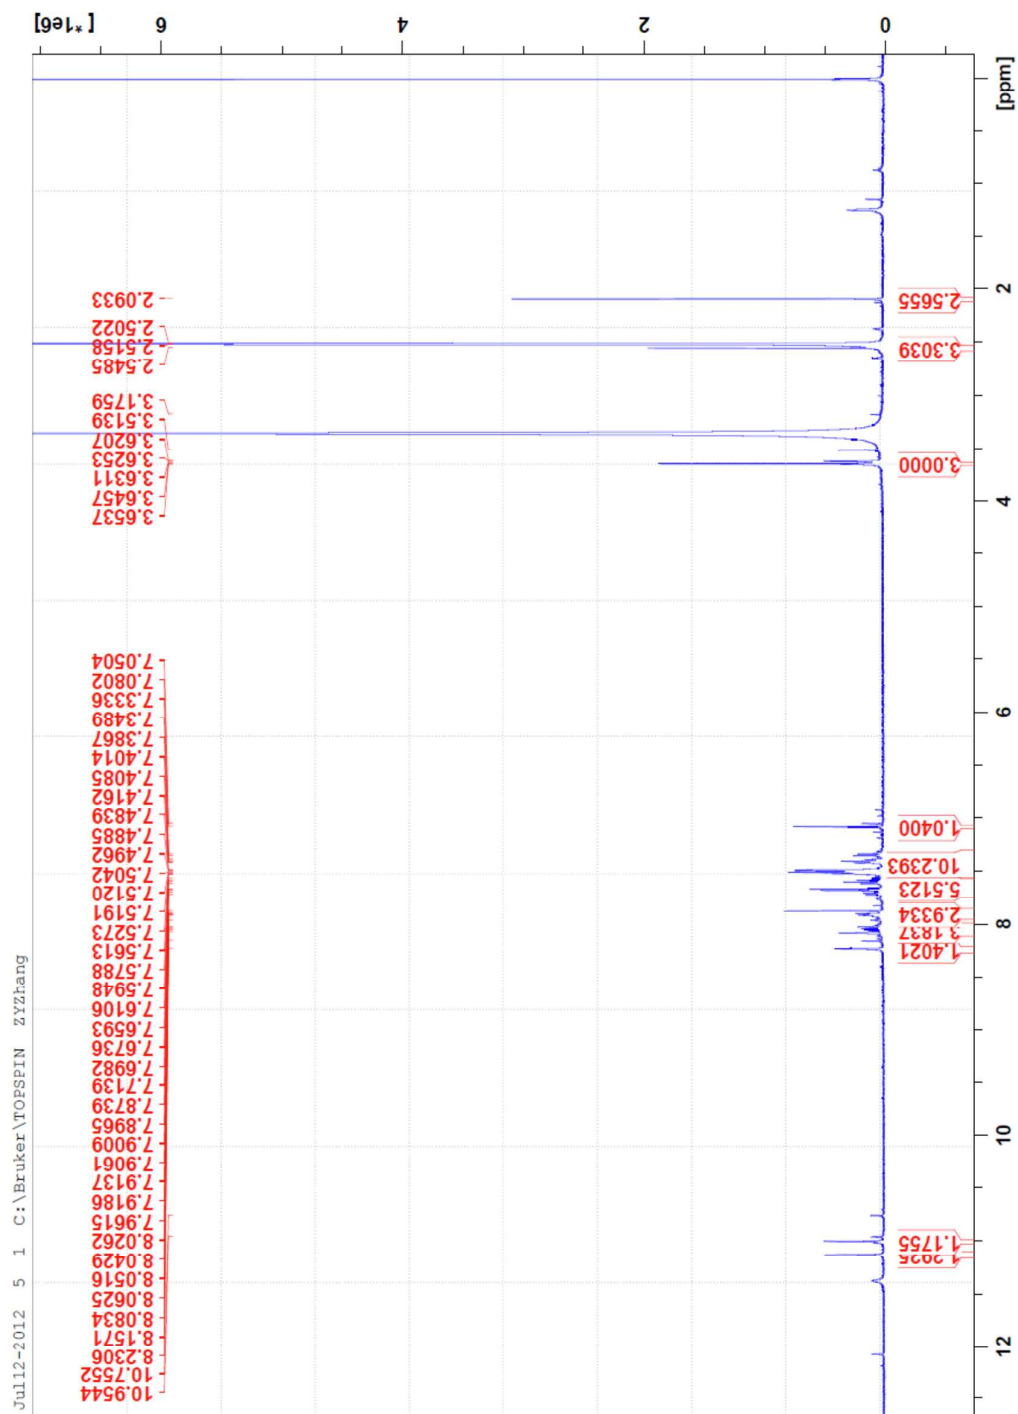

Jul12-2012 5 1 C:\Bruker\TOPSPIN ZYZhang

<sup>1</sup>H NMR for compound 11a-6

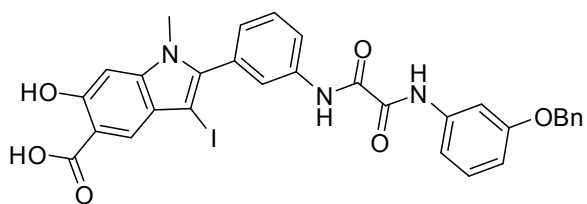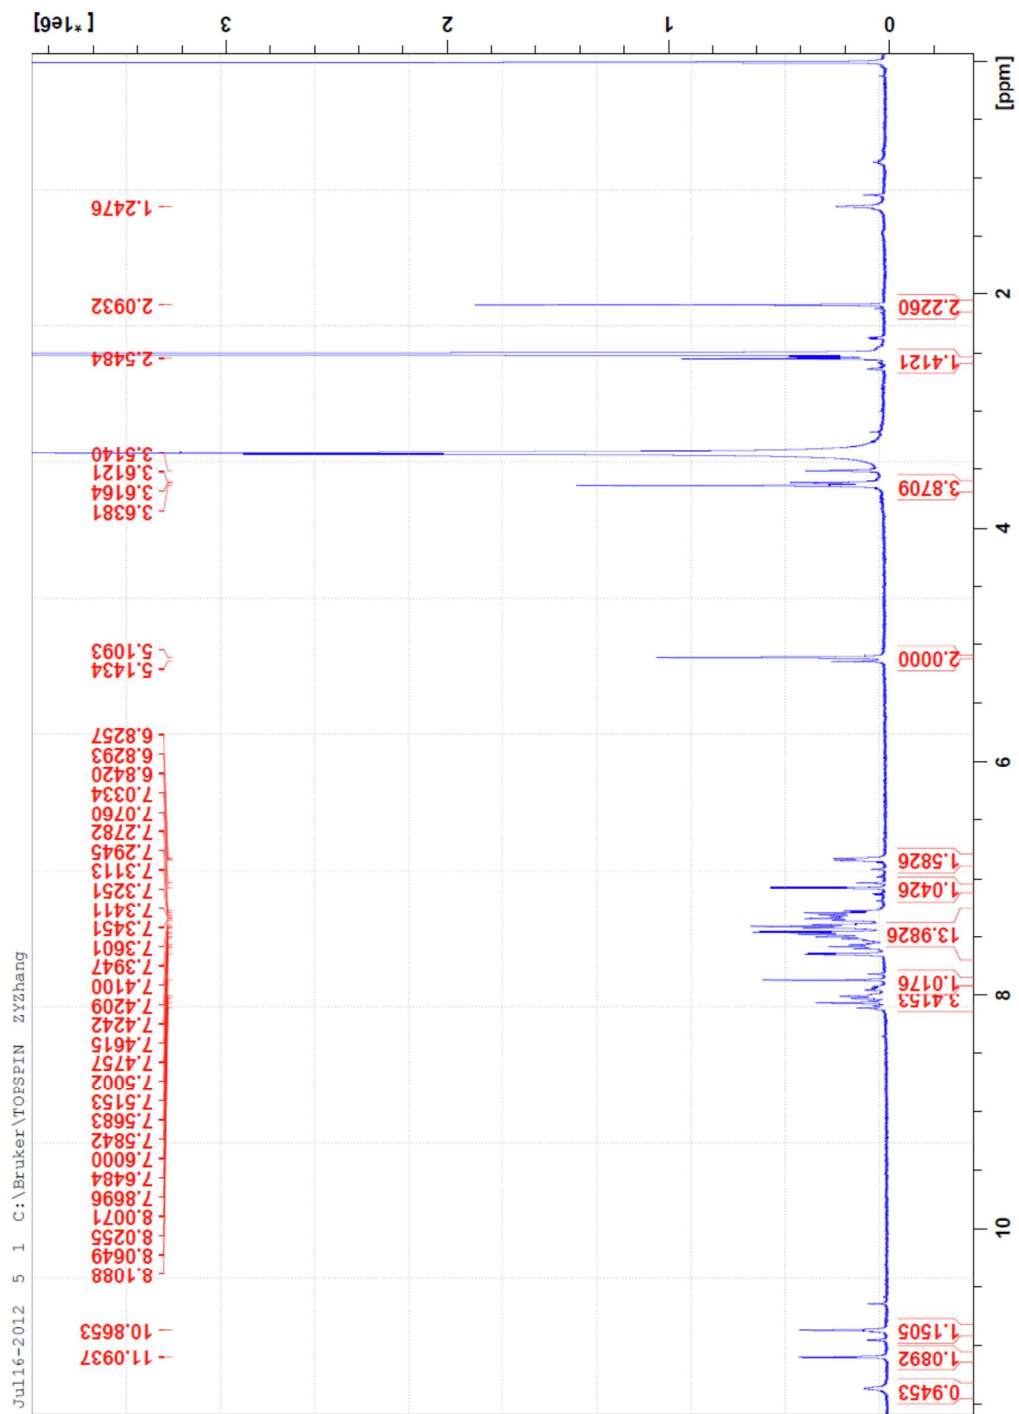

<sup>1</sup>H NMR for compound 11a-7

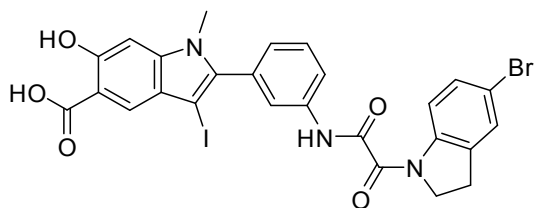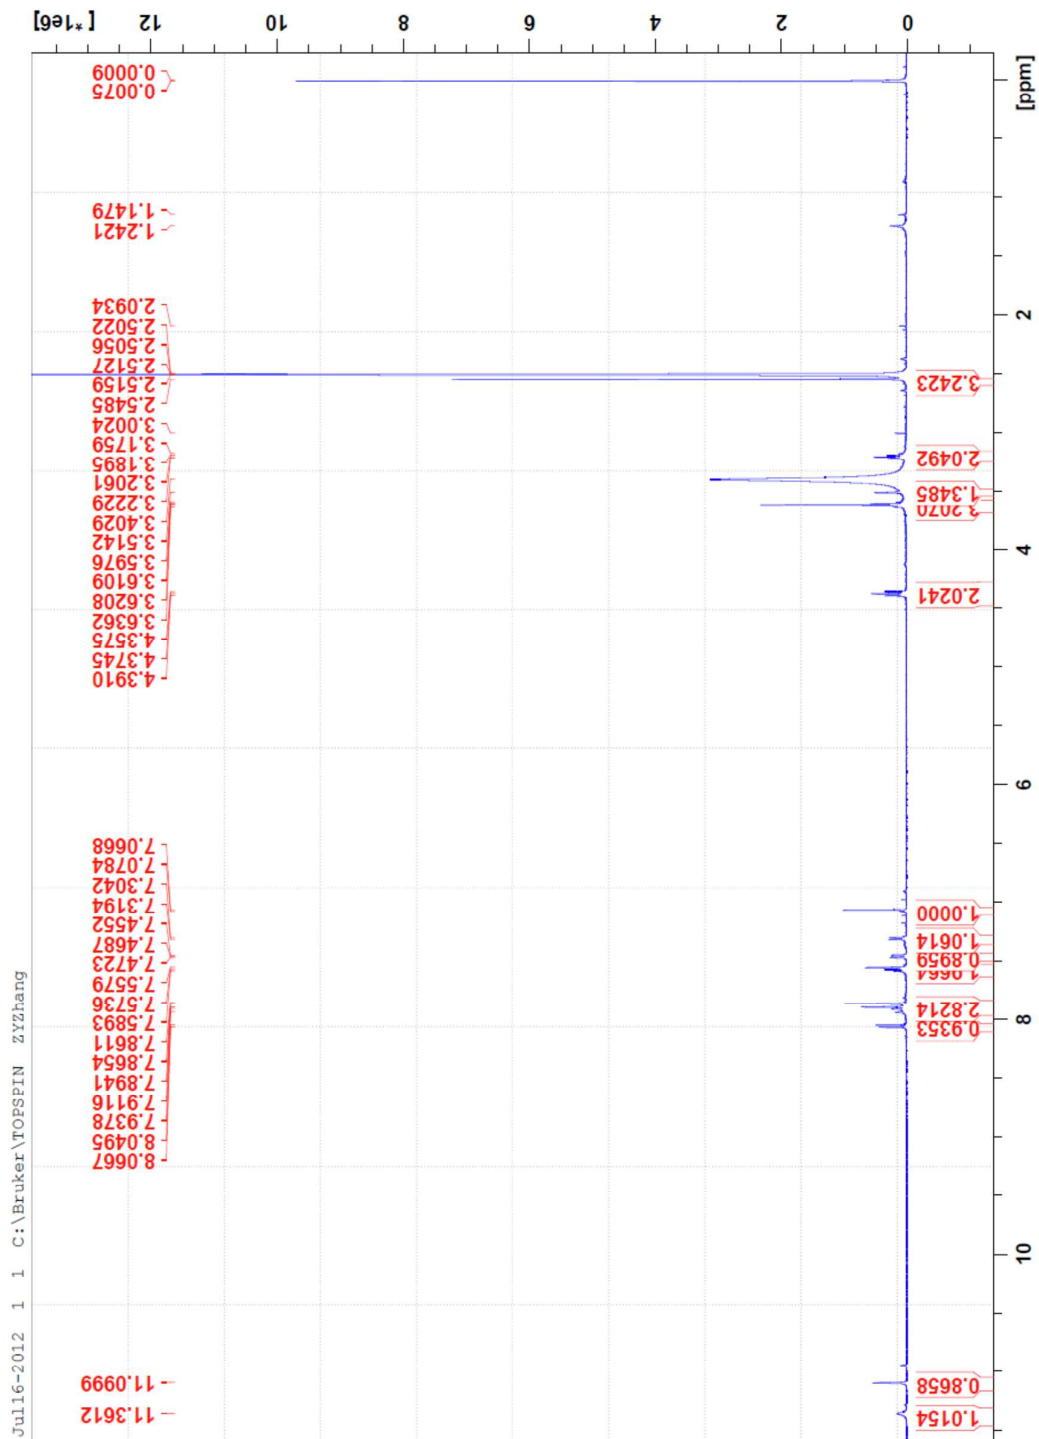

<sup>1</sup>H NMR for compound 11a-8

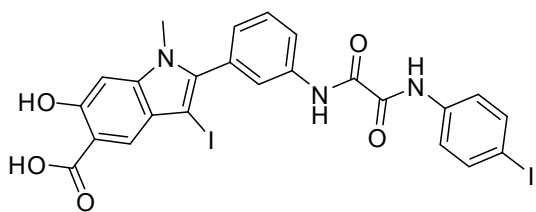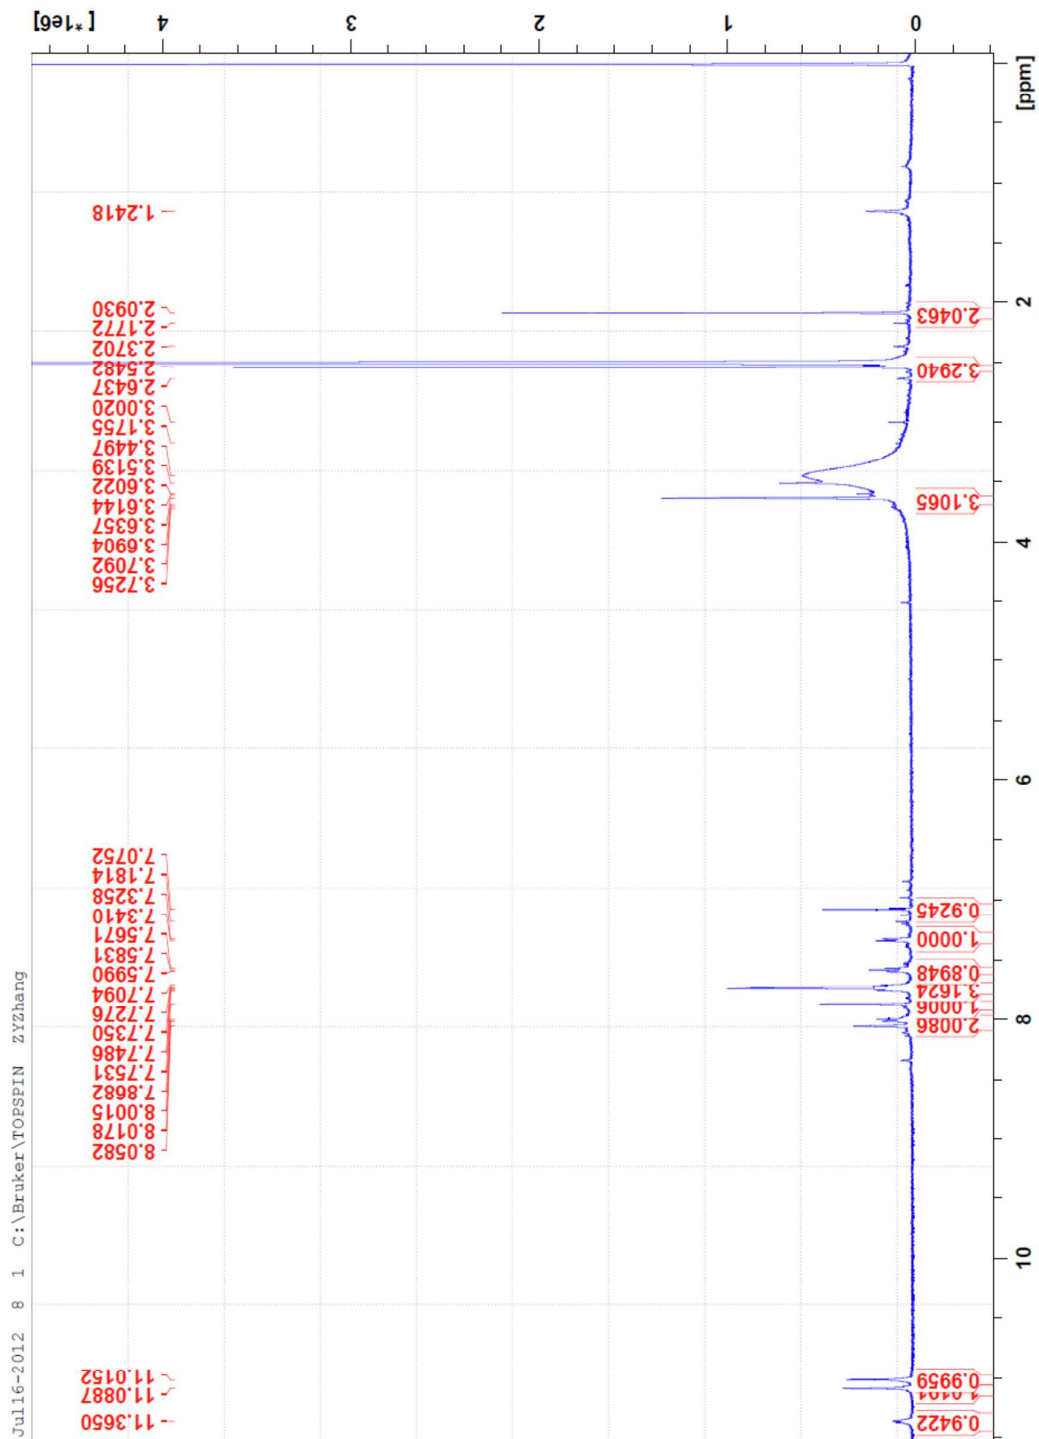

1H NMR for compound 11a-9

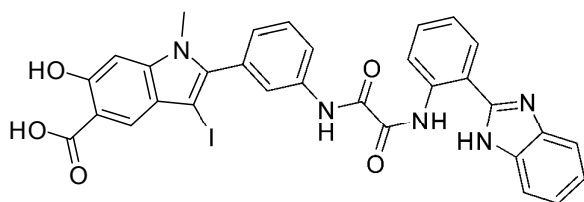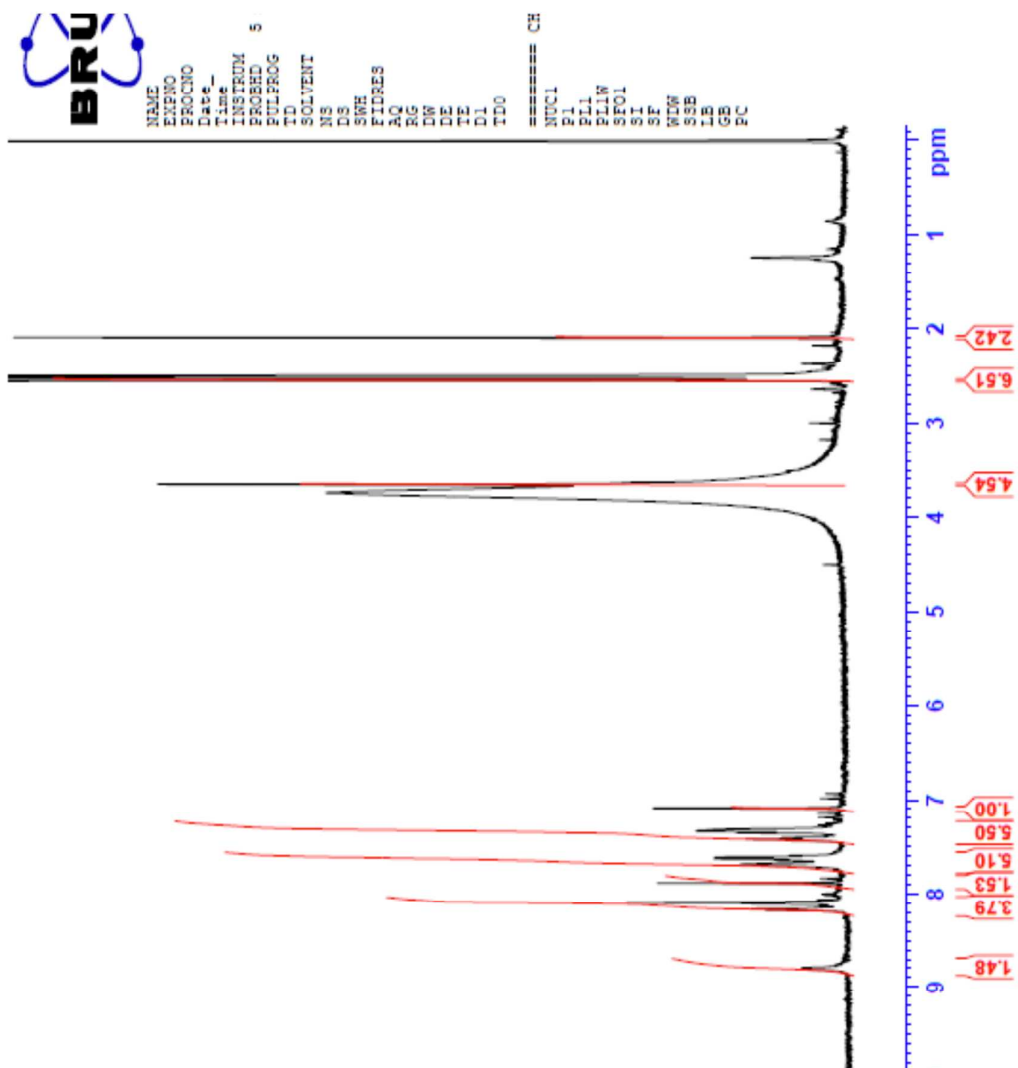

1H NMR for compound 11a-10

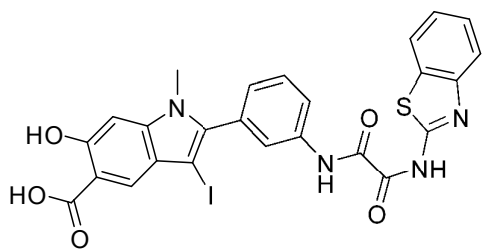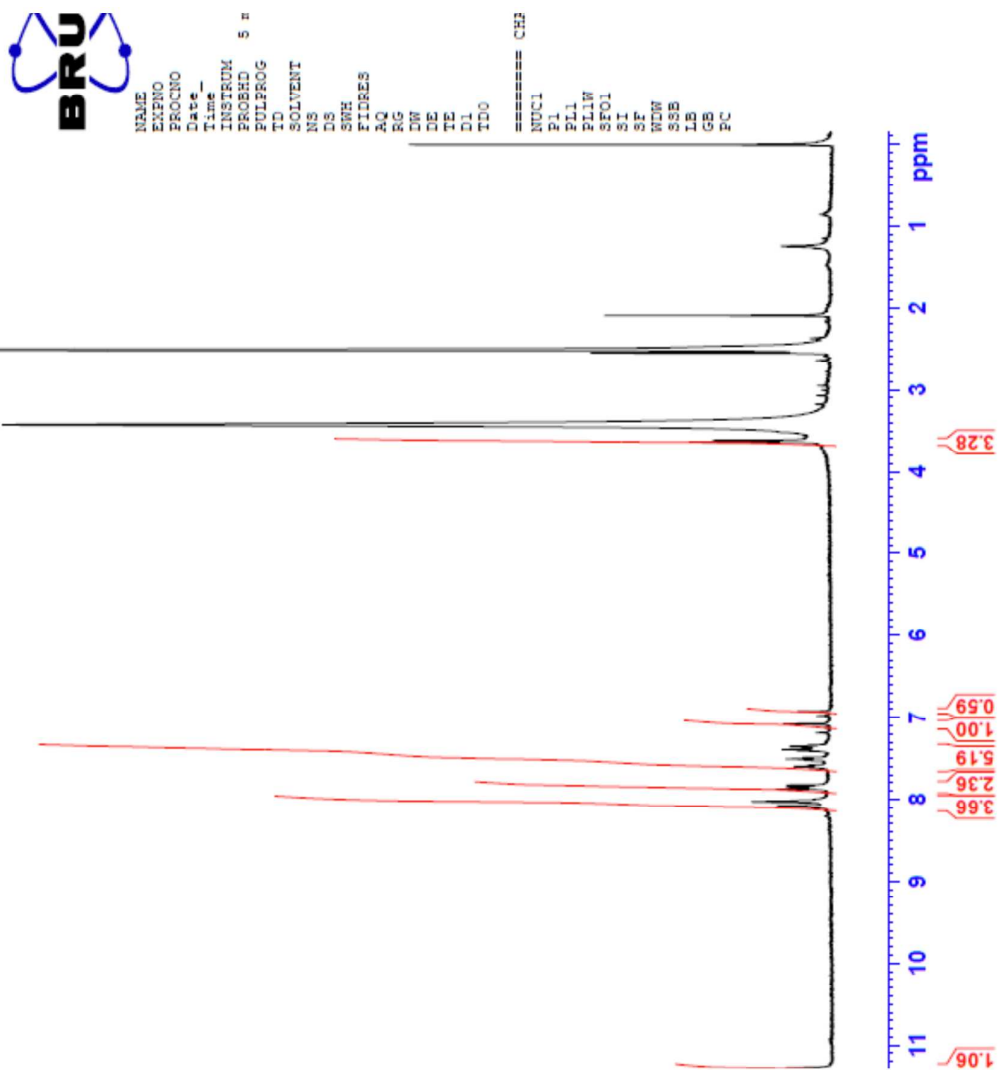



<sup>1</sup>H NMR for compound 11a-11

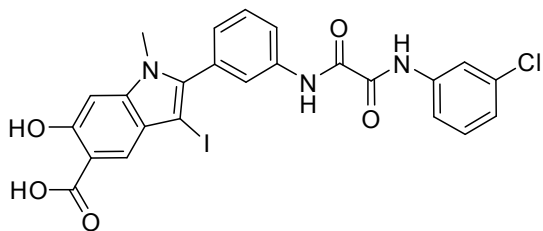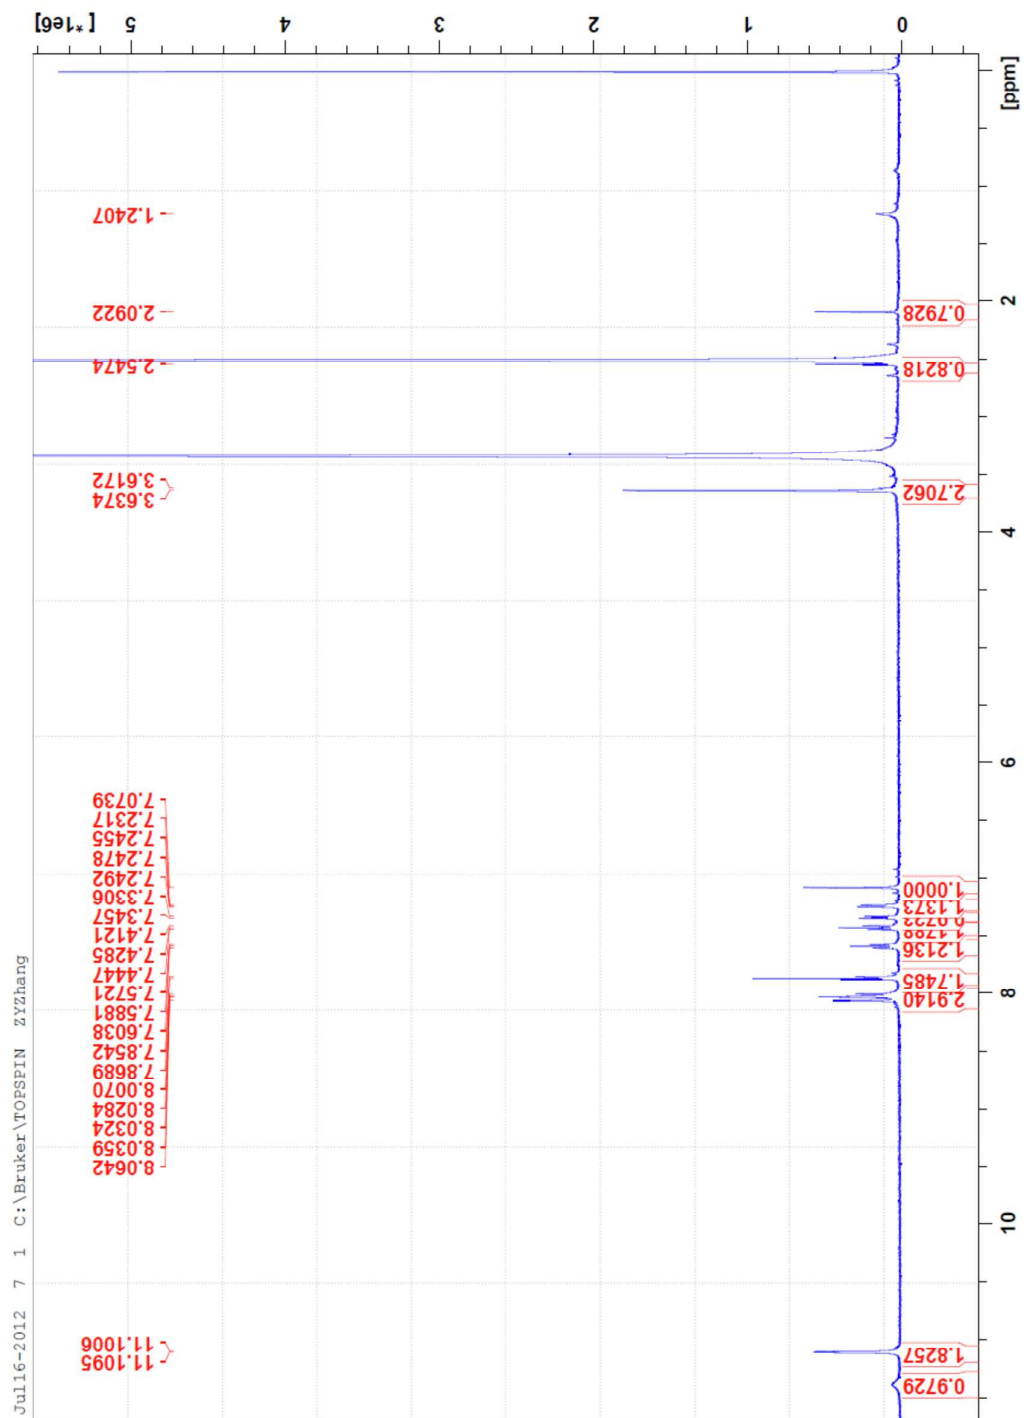

<sup>1</sup>H NMR for compound 11a-12

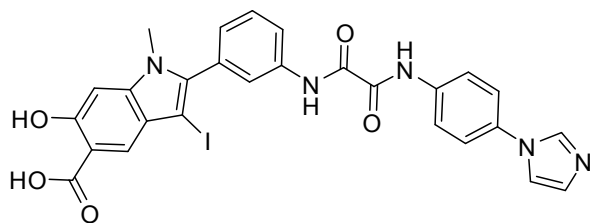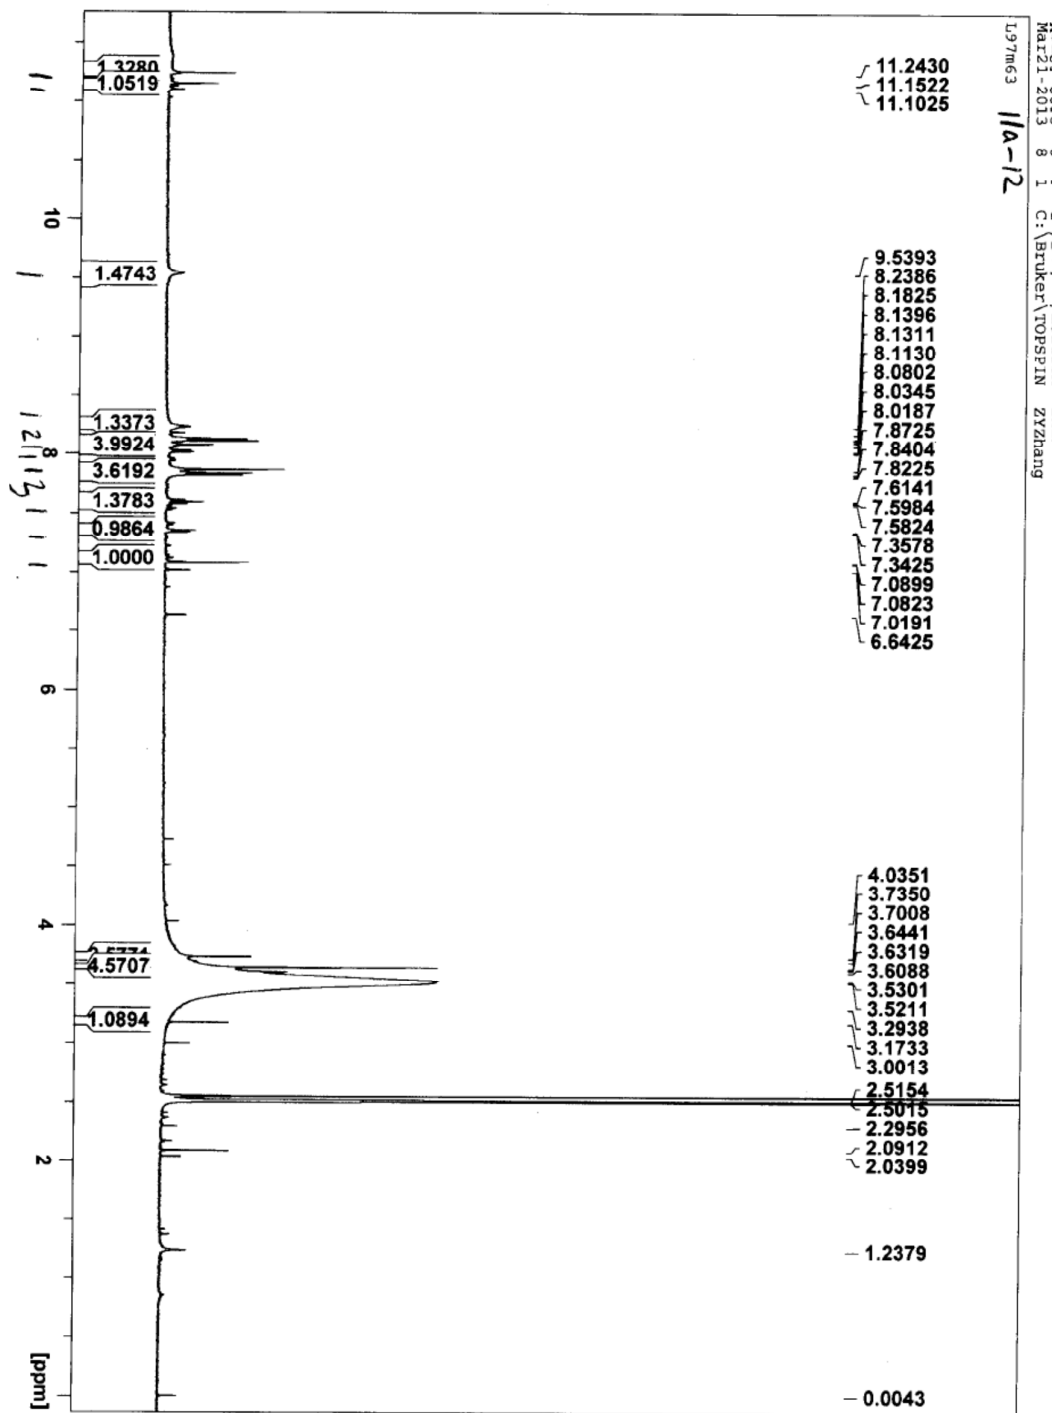

1H NMR for compound 11a-13

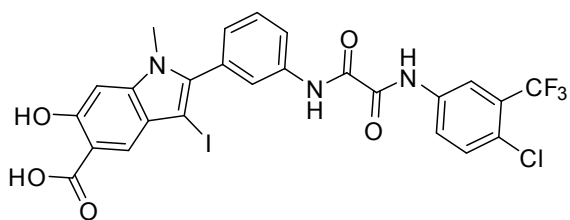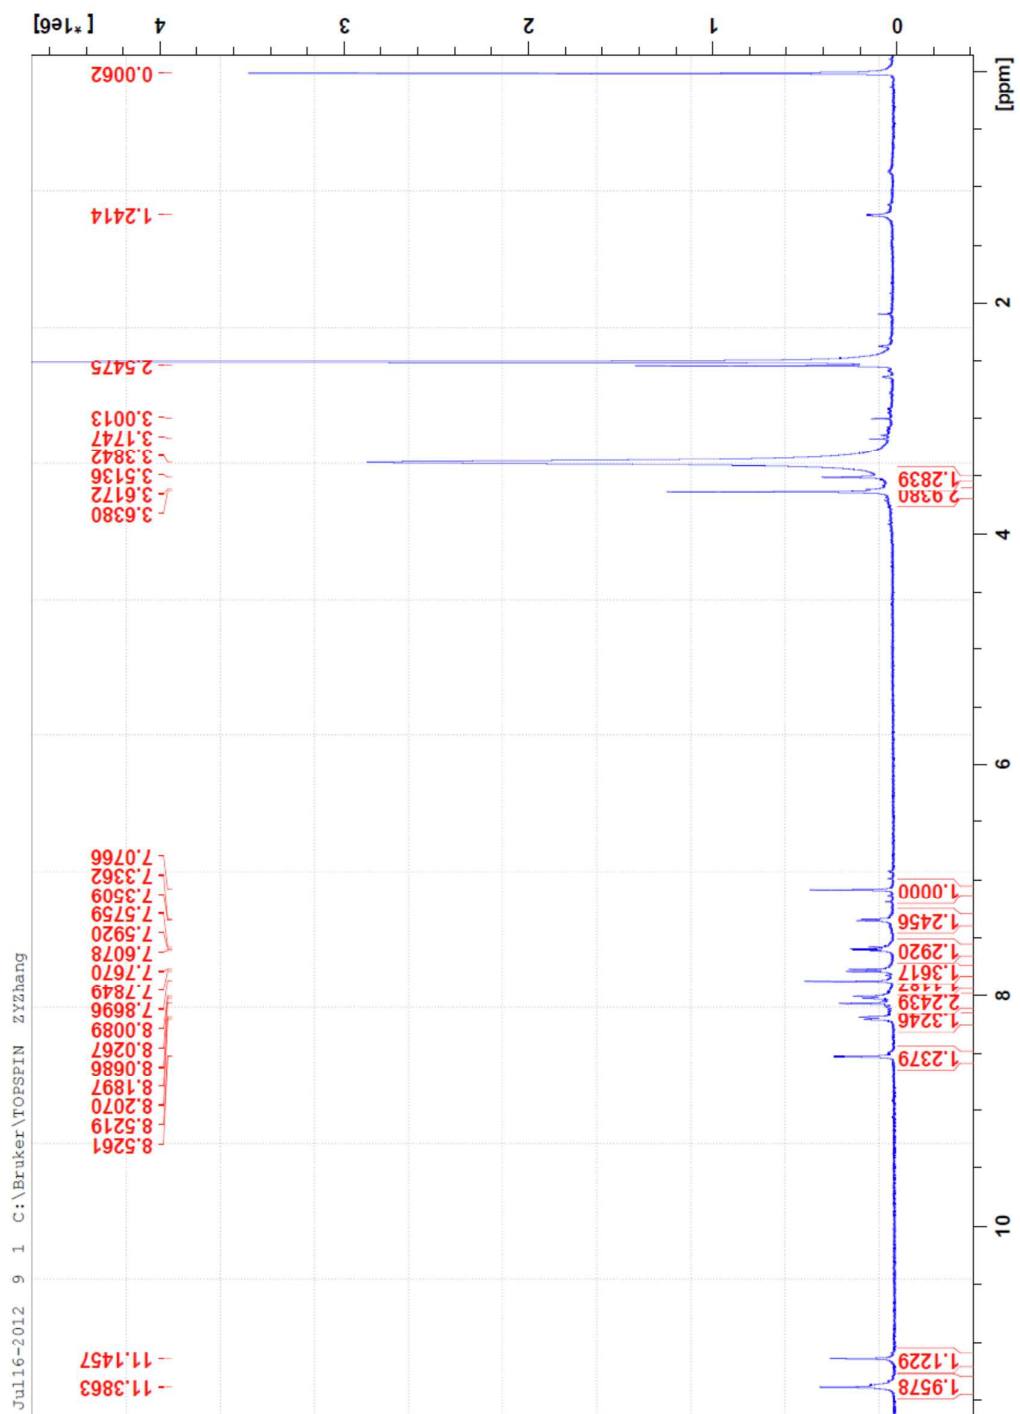

<sup>1</sup>H NMR for compound 11a-14

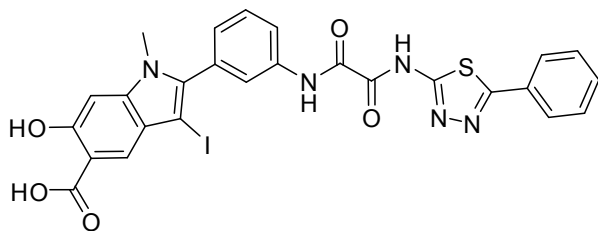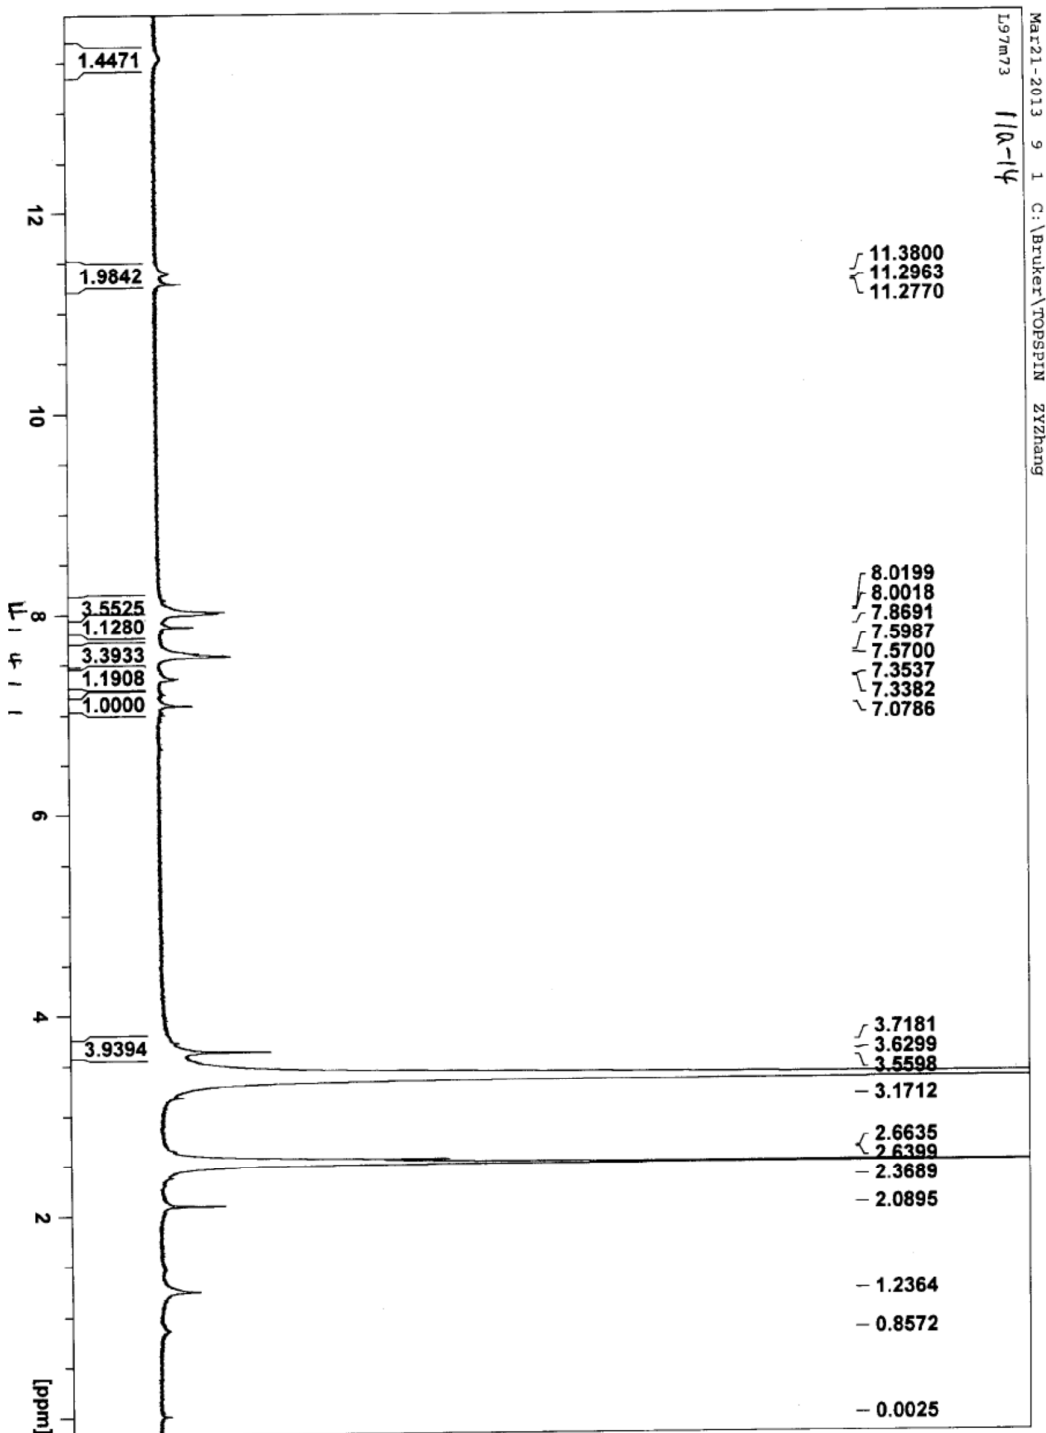

1H NMR for compound 11a-15

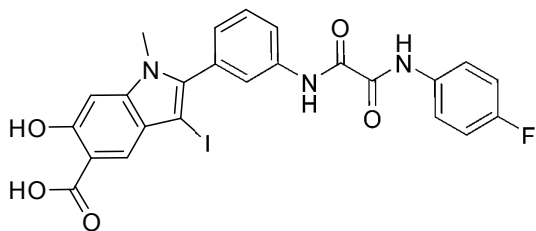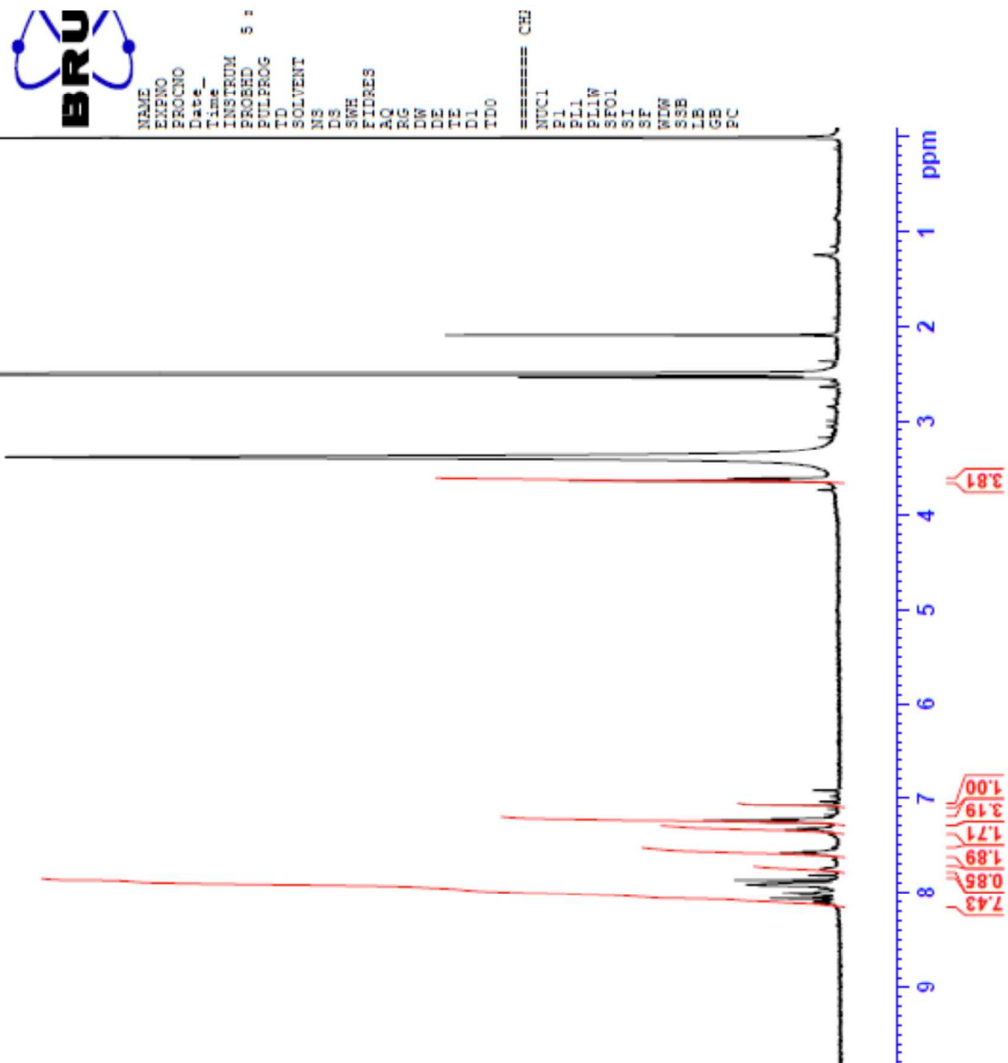

<sup>1</sup>H NMR for compound 11a-16

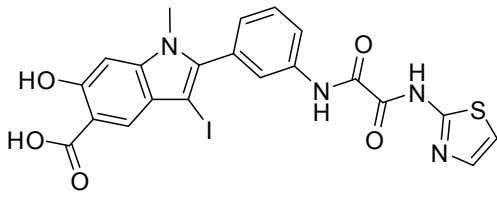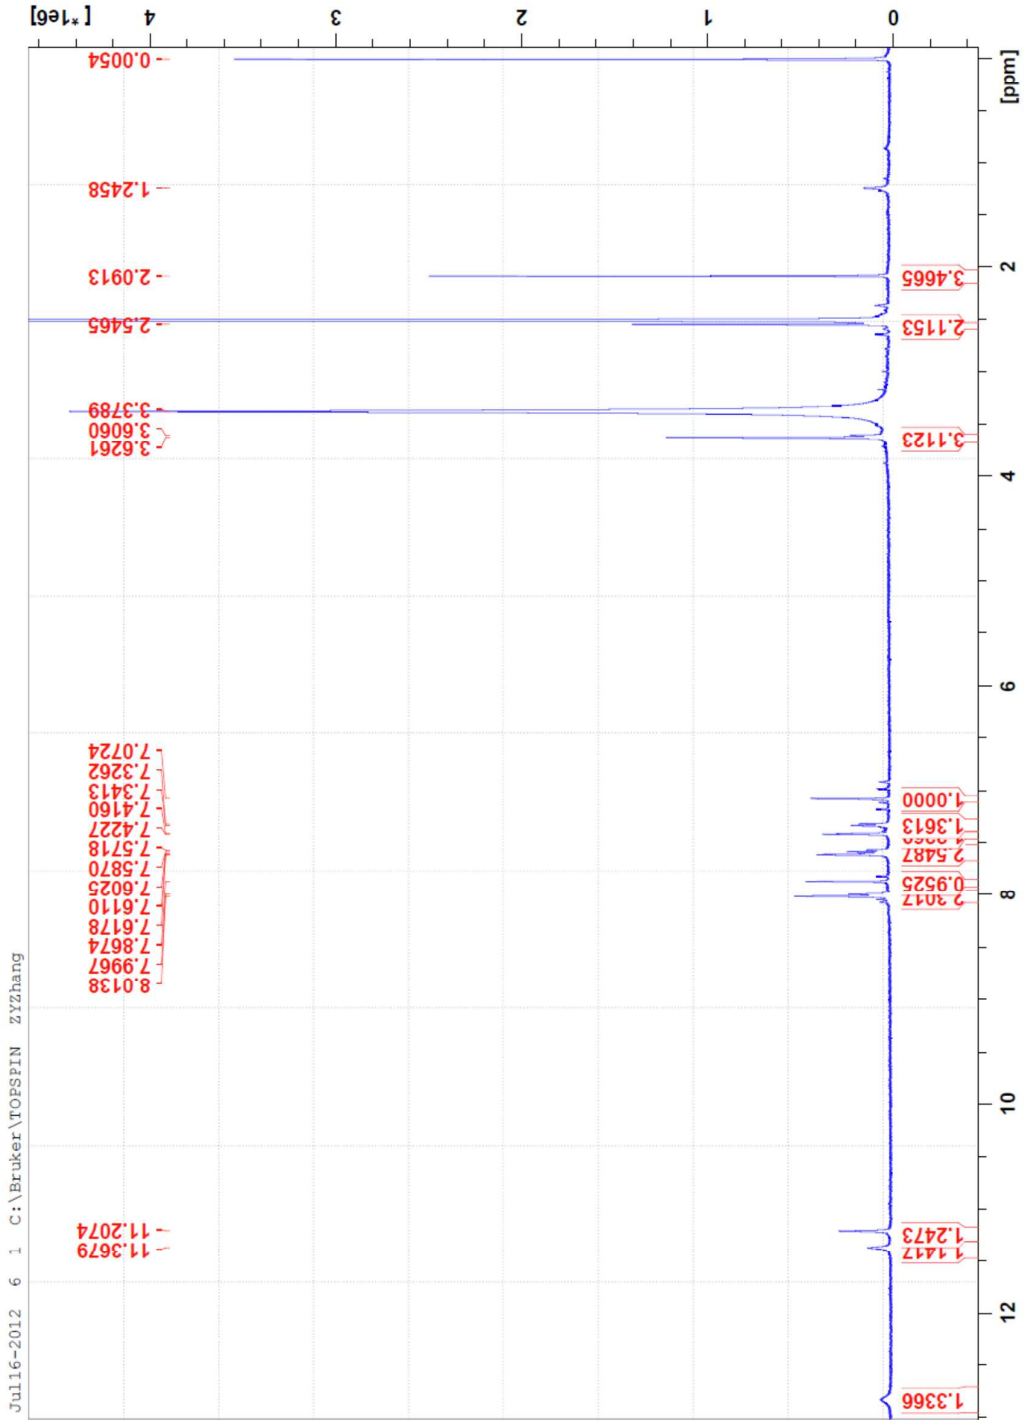

<sup>1</sup>H NMR for compound 11a-17

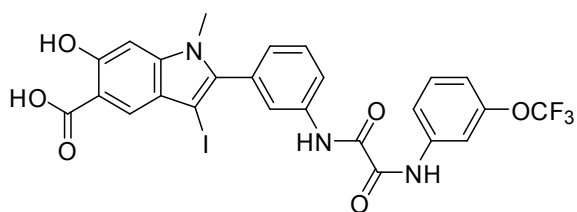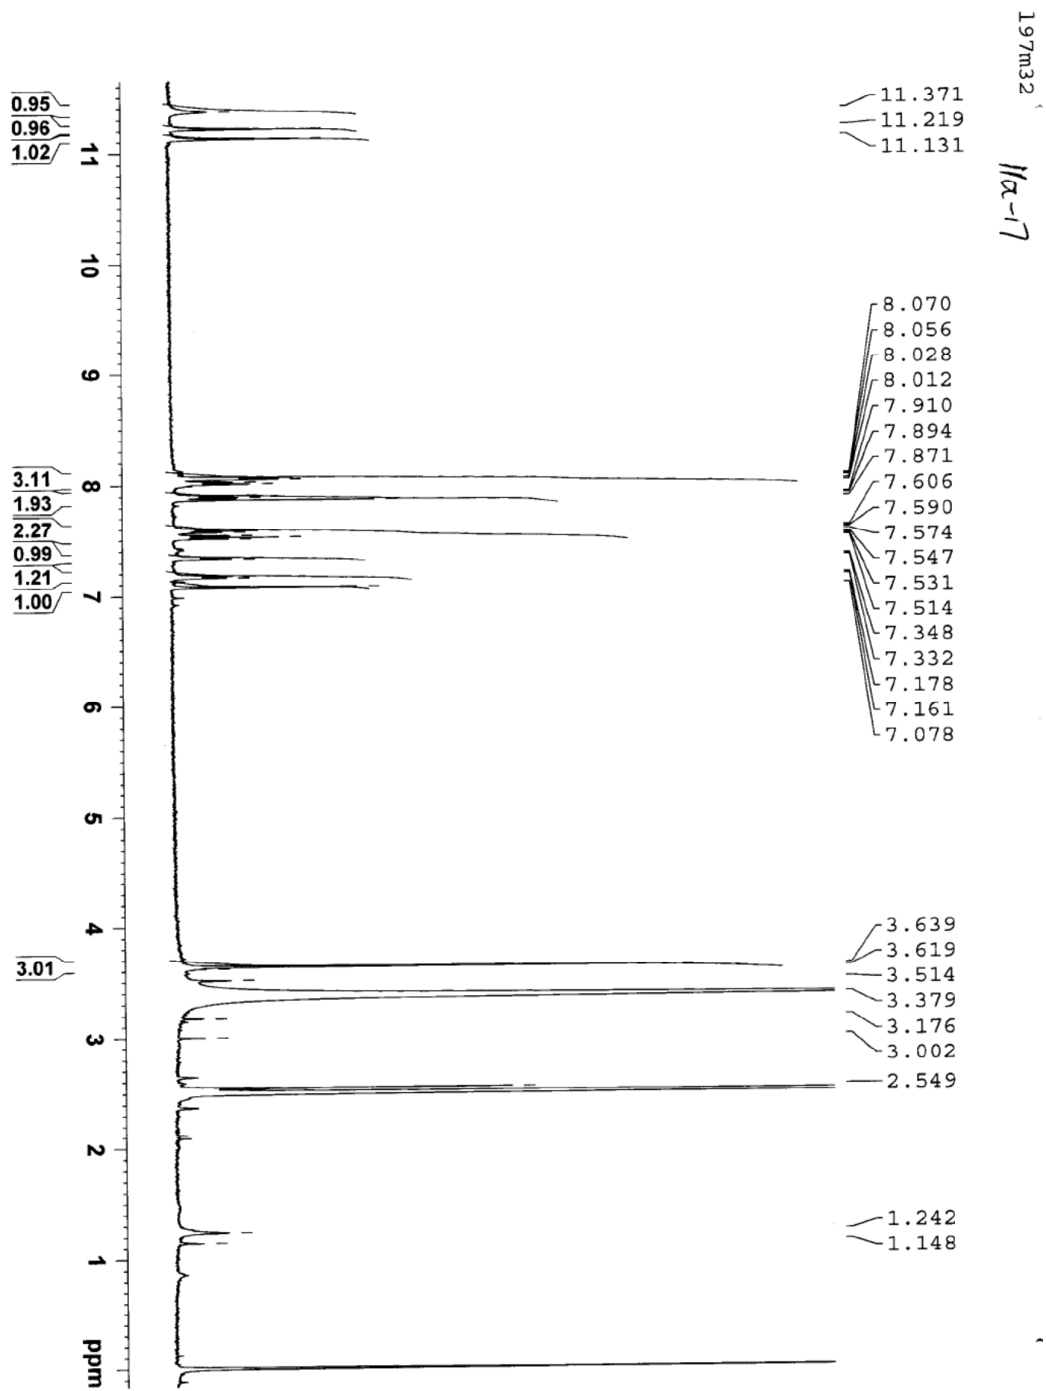

<sup>1</sup>H NMR for compound 11a-18

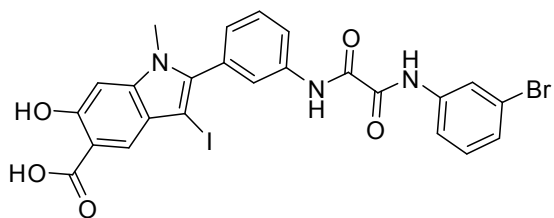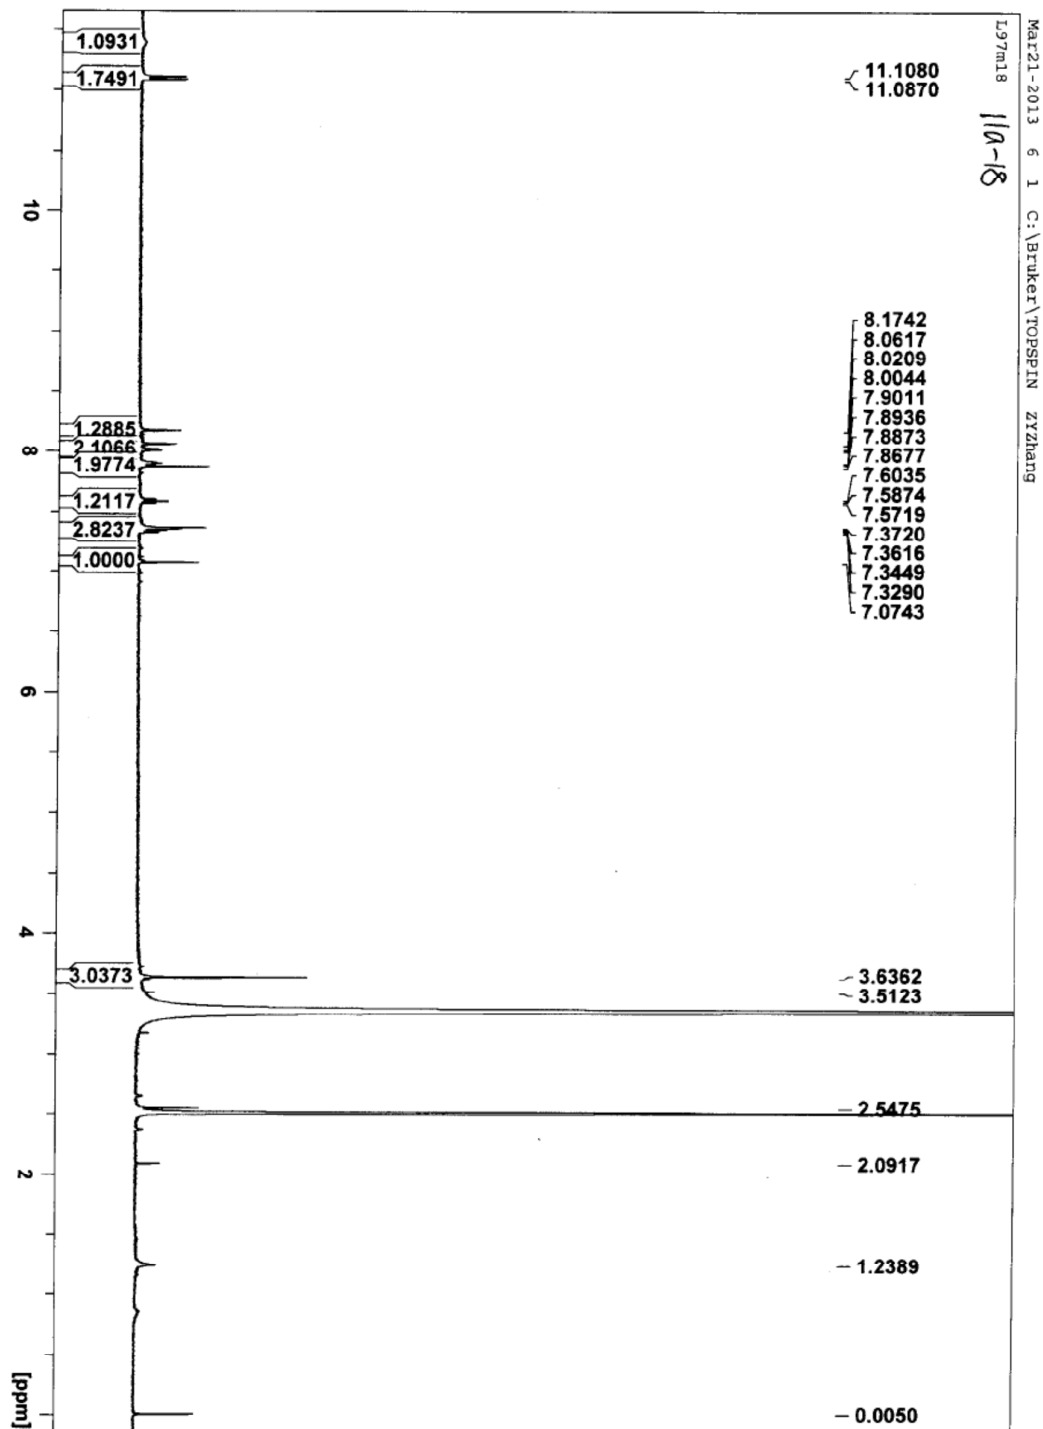



1H NMR for compound 11a-19

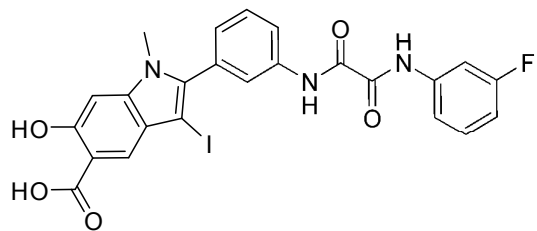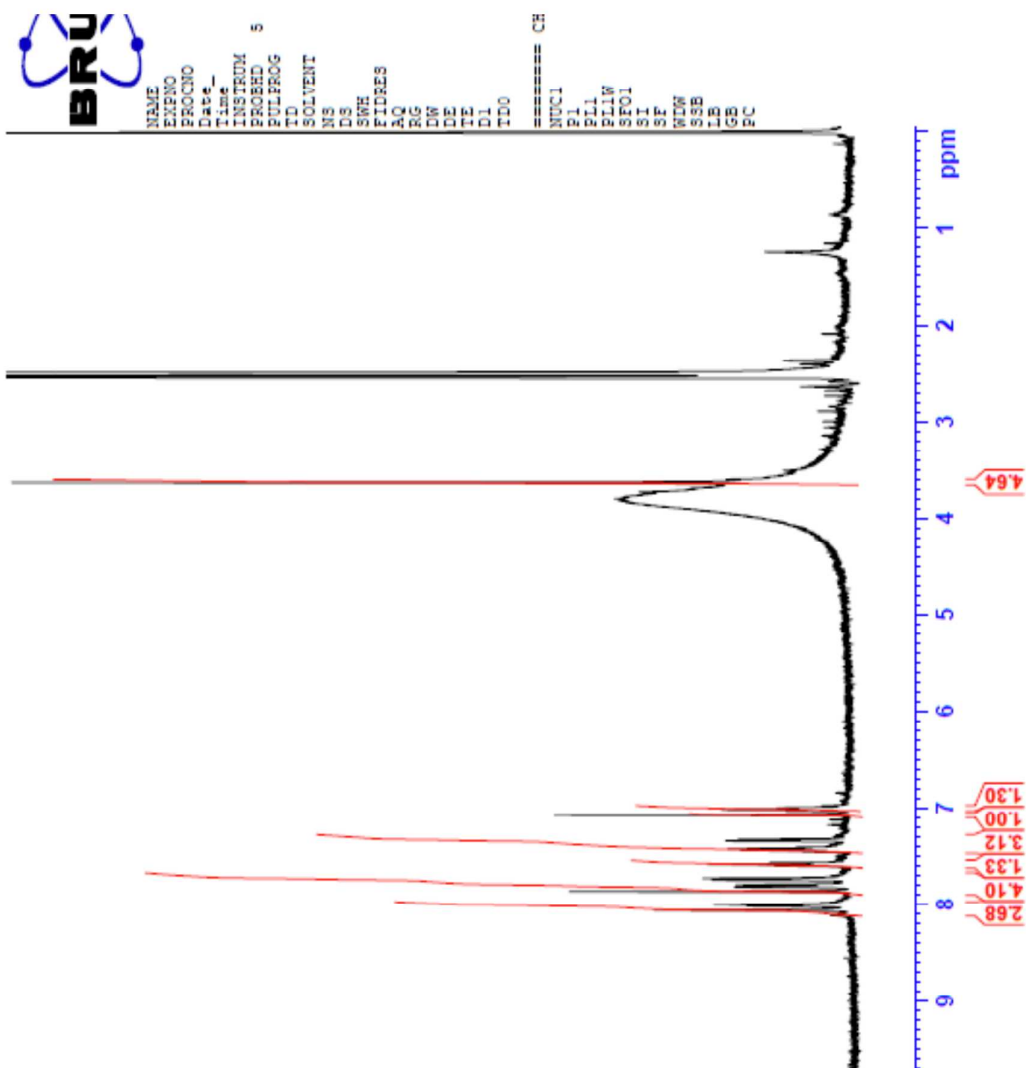

<sup>1</sup>H NMR for compound 11a-20

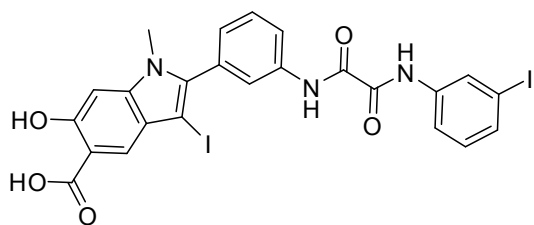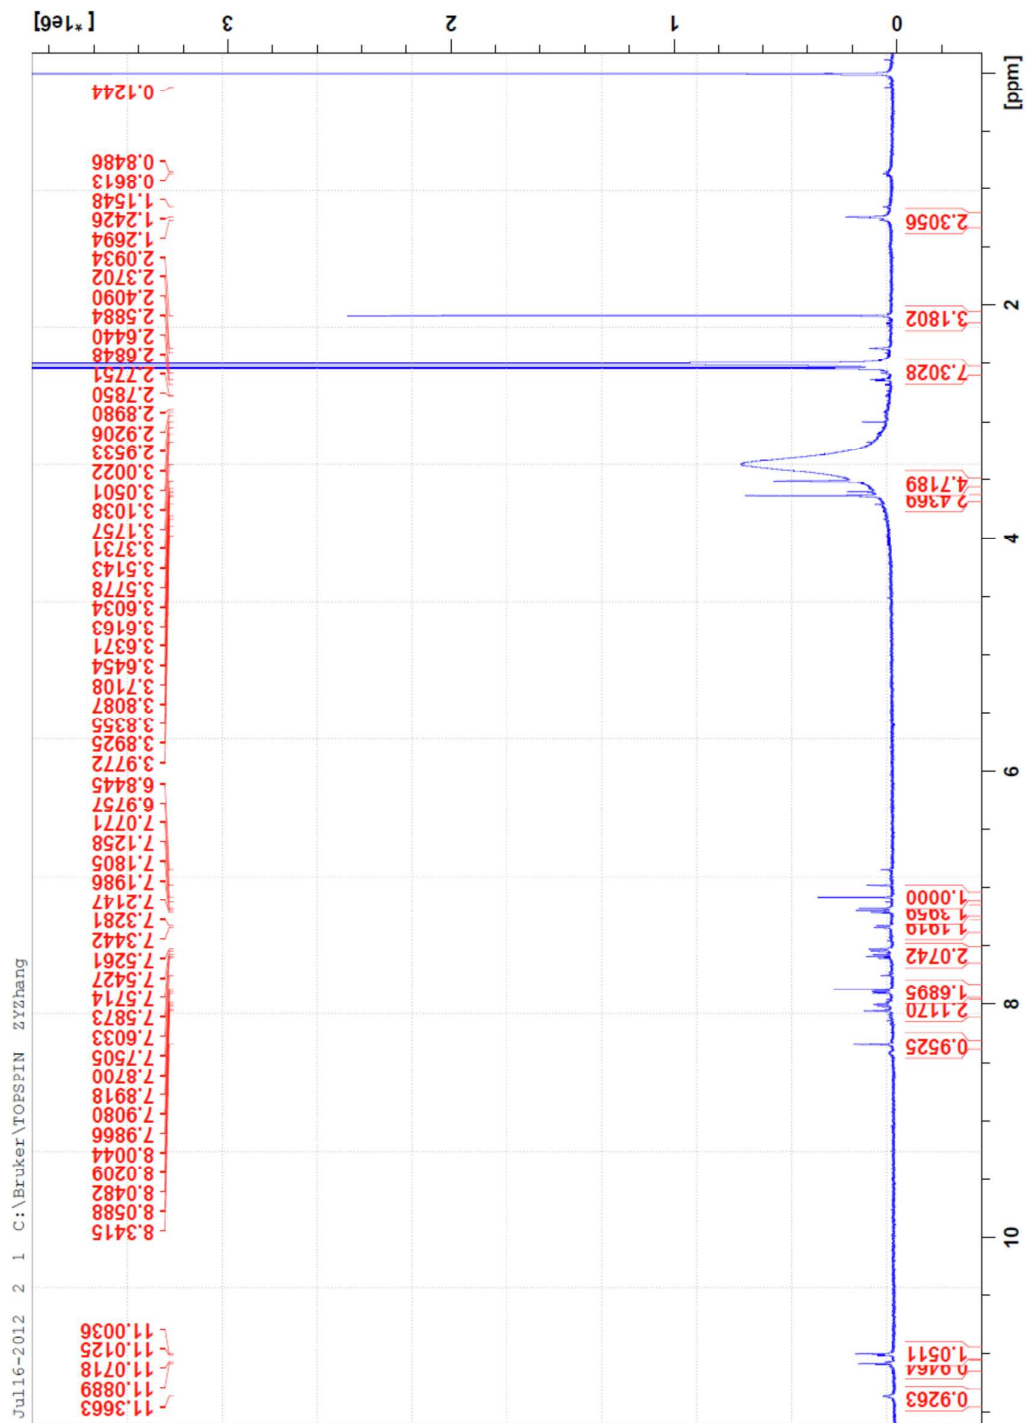

<sup>1</sup>H NMR for compound 11a-21

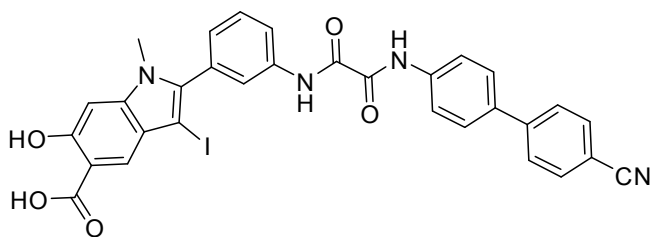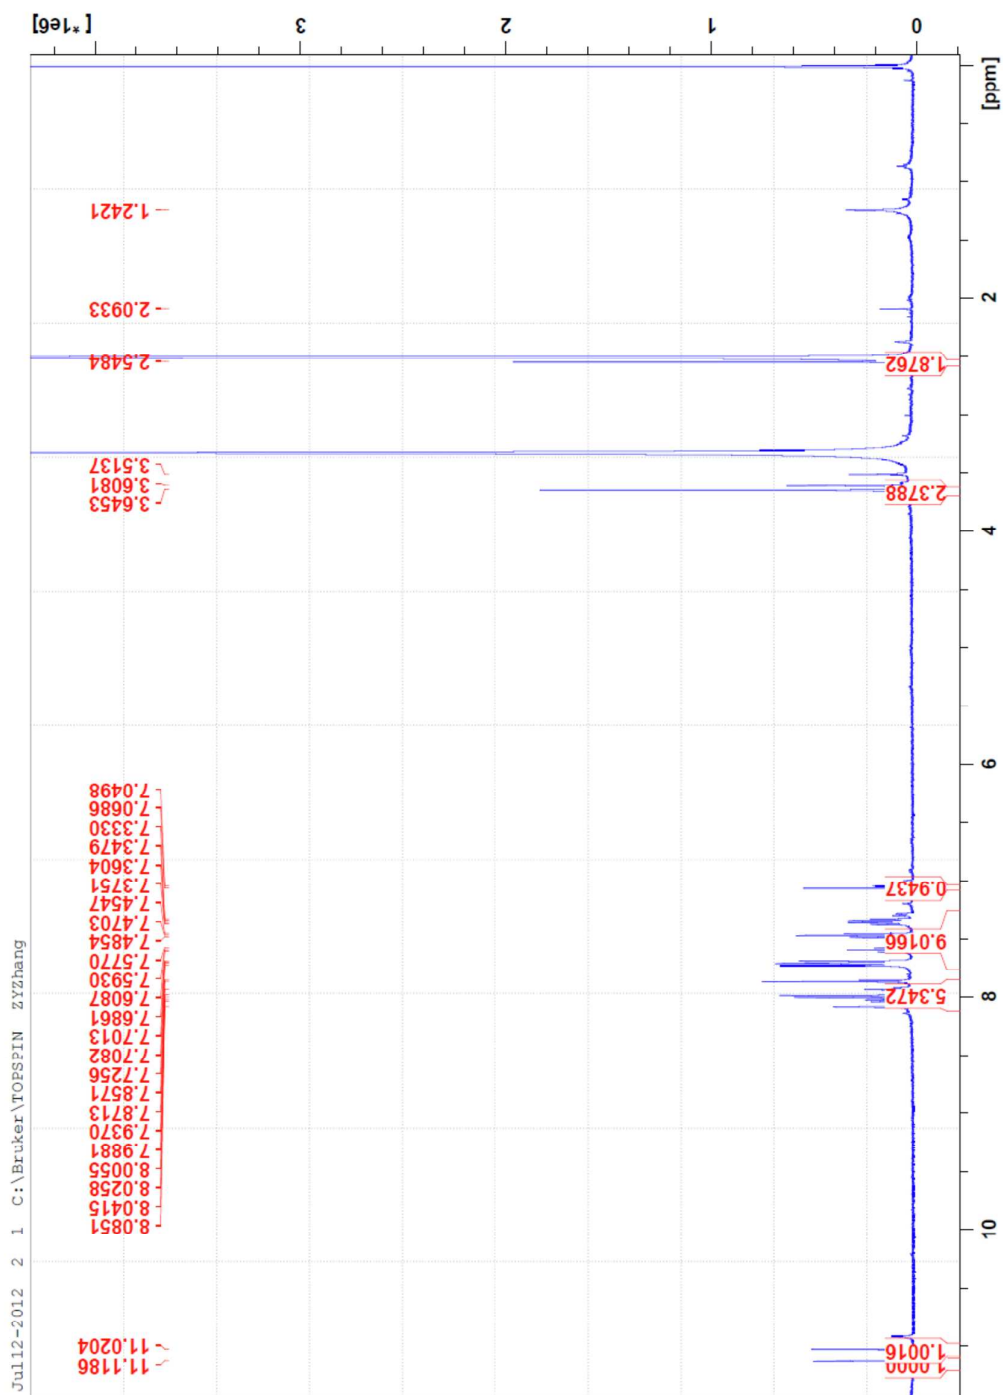

1H NMR for compound 11a-22

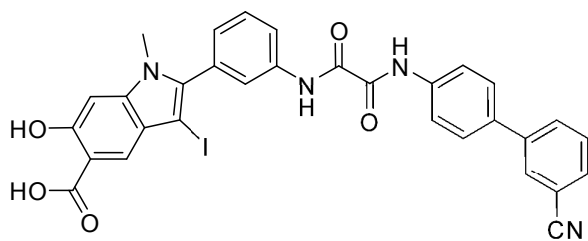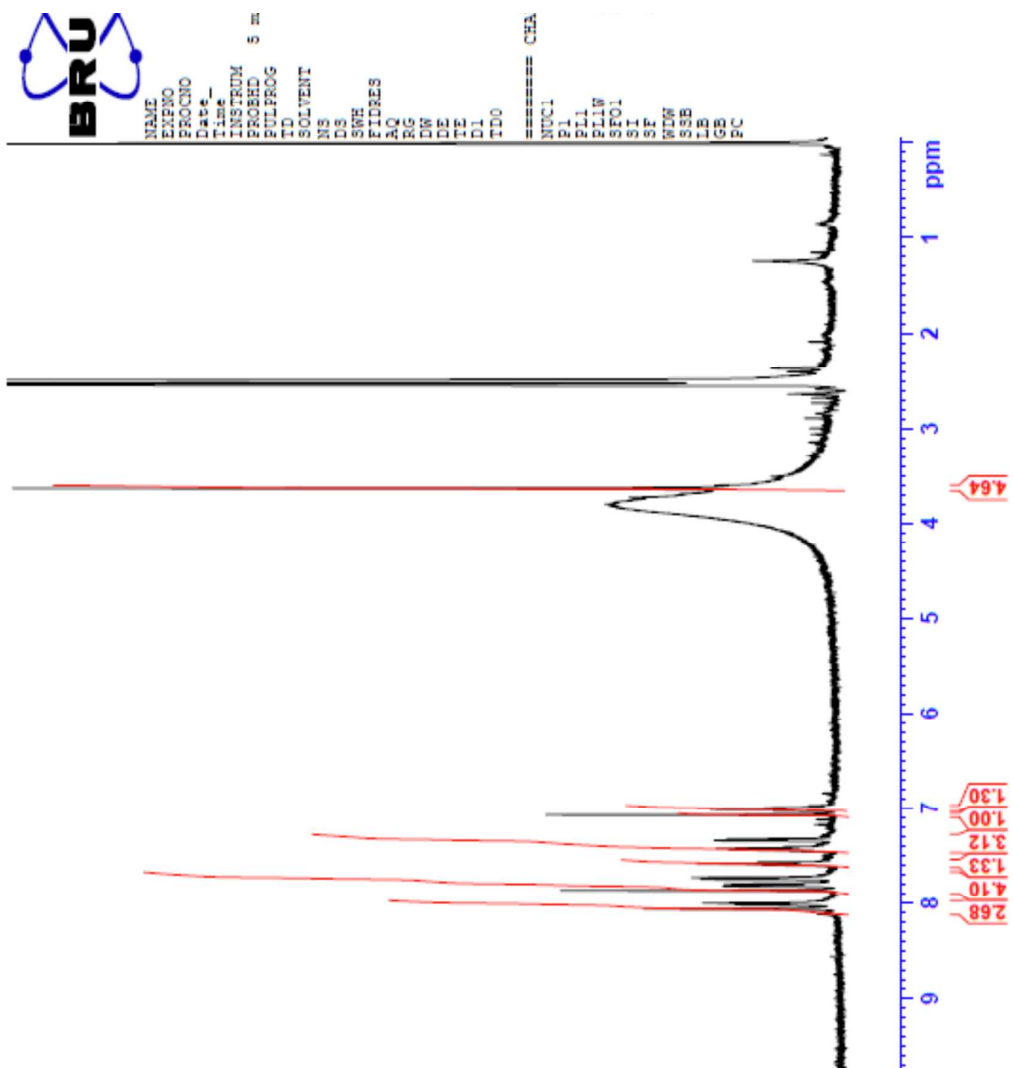

<sup>1</sup>H NMR for compound 11a-23

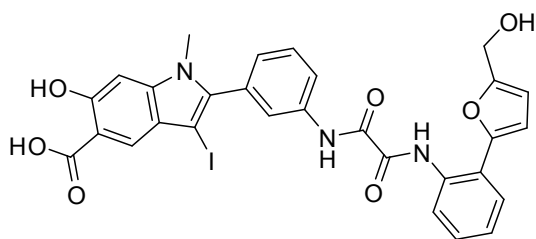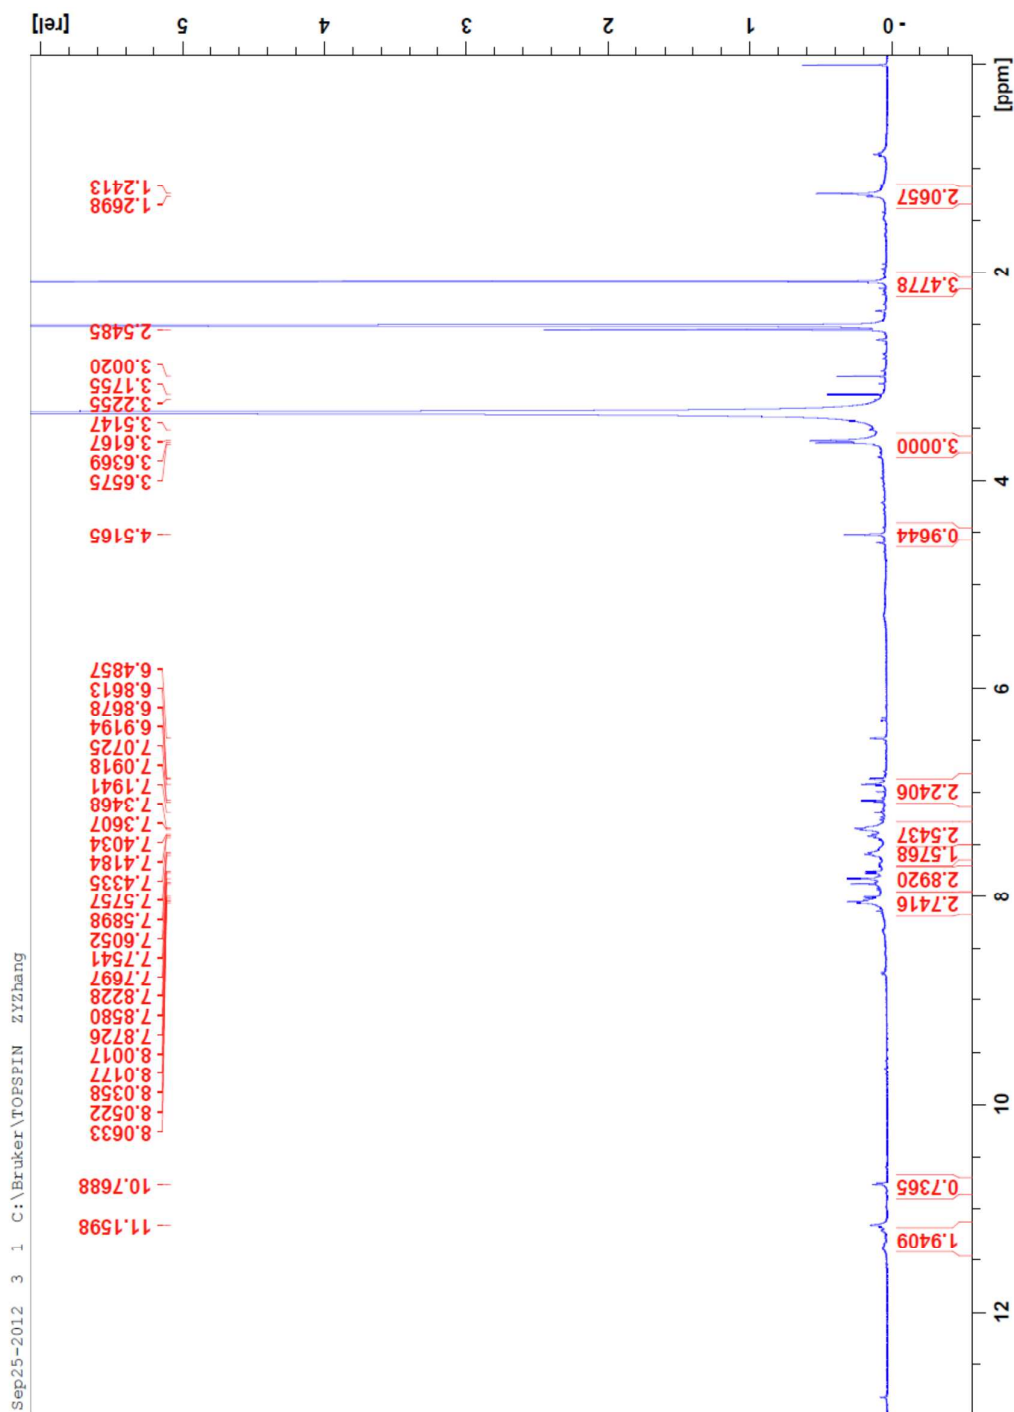

<sup>1</sup>H NMR for compound 11a-24

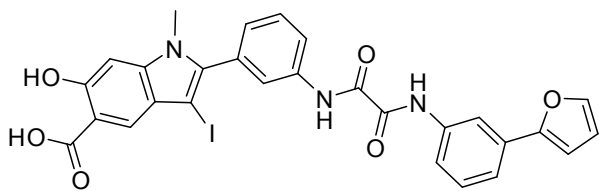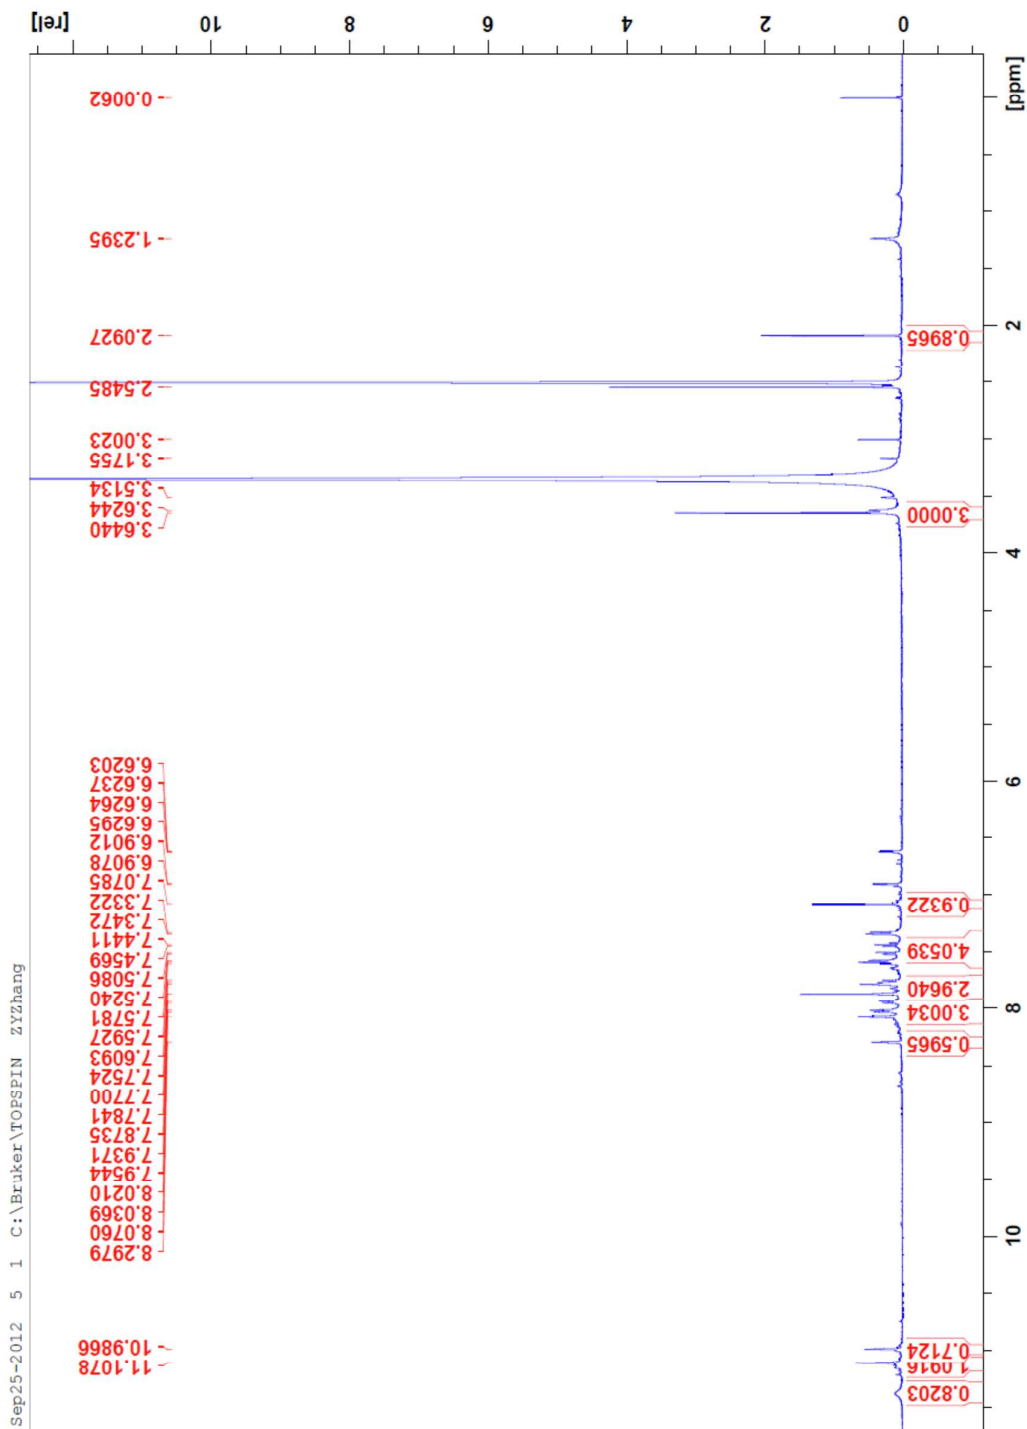

<sup>1</sup>H NMR for compound 11a-25

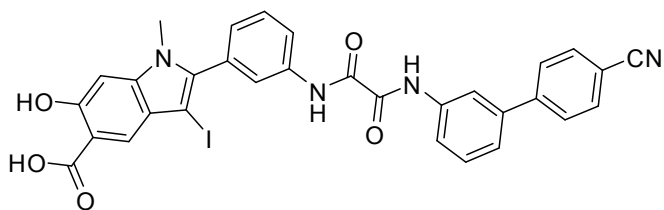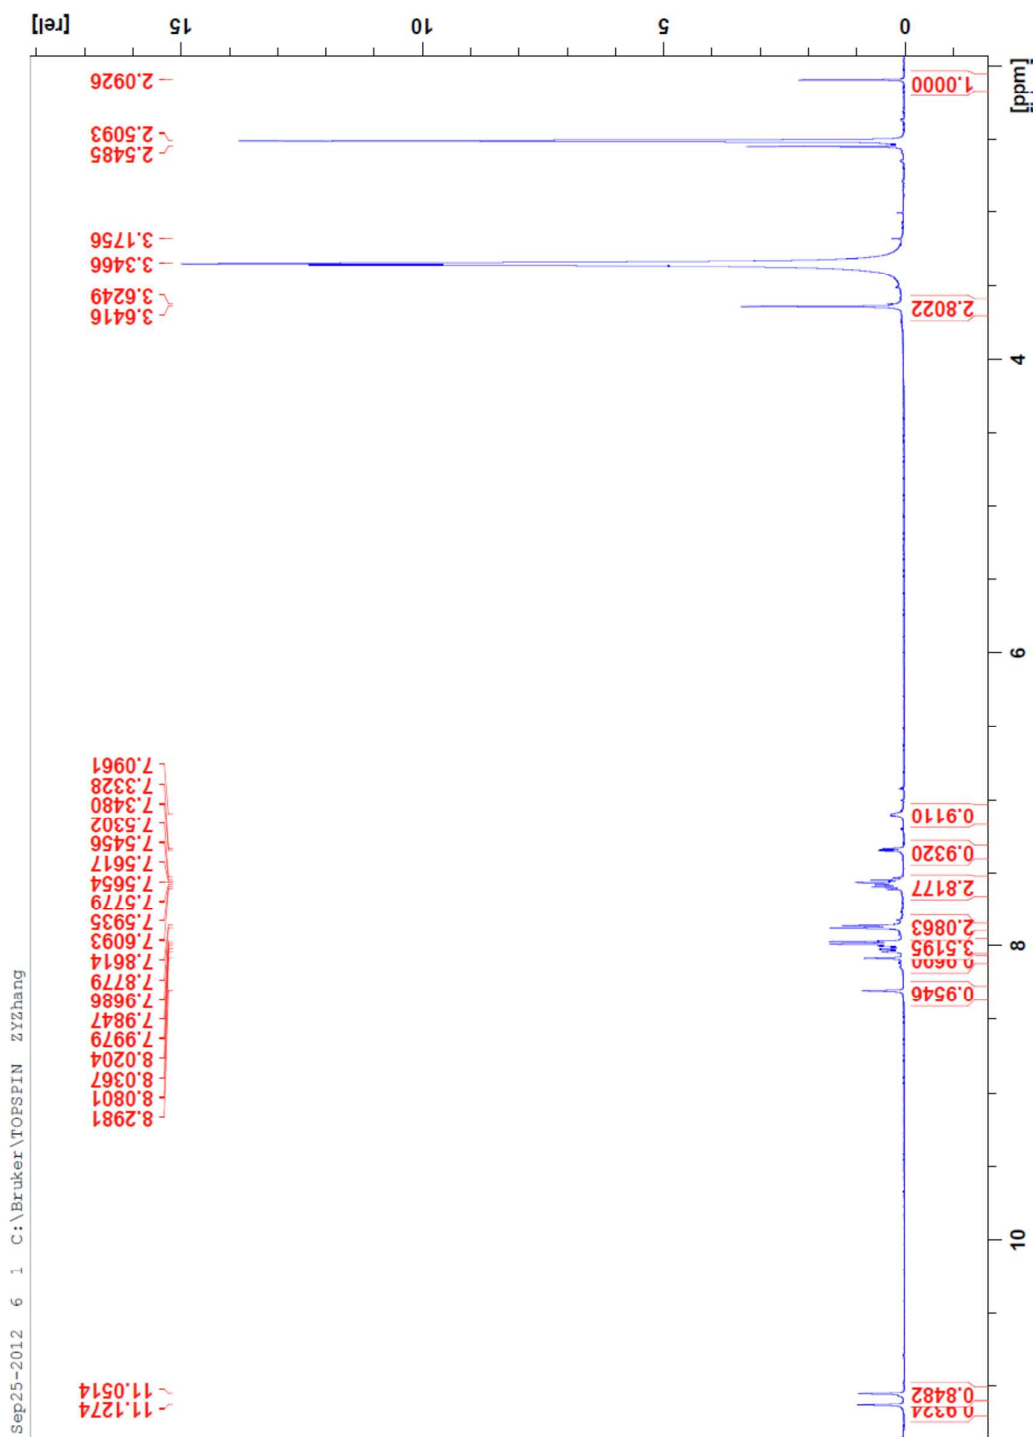

Sep25-2012 6 1 C:\Bruker\TOPSPIN YZhang

1H NMR for compound 11a-26

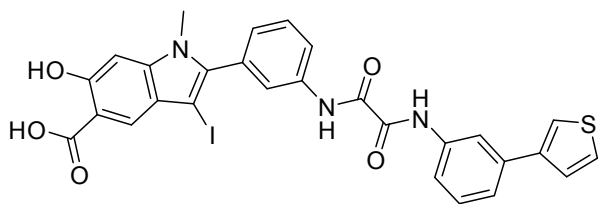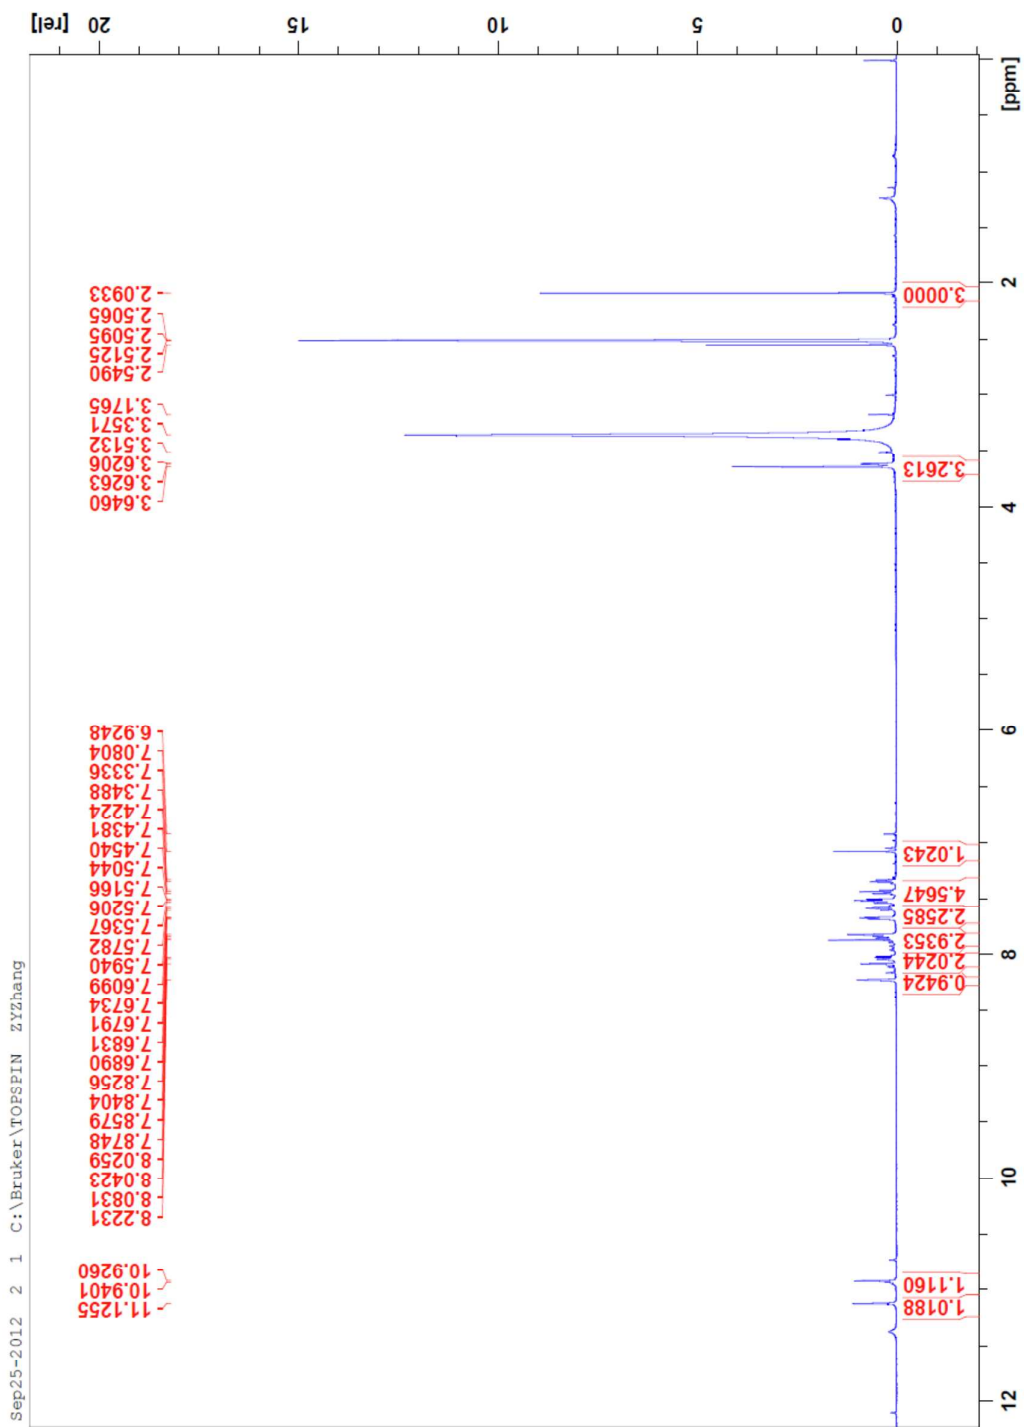



<sup>1</sup>H NMR for compound 11c-1

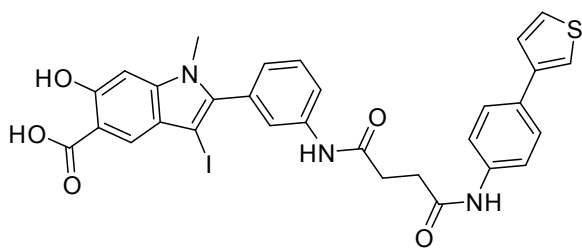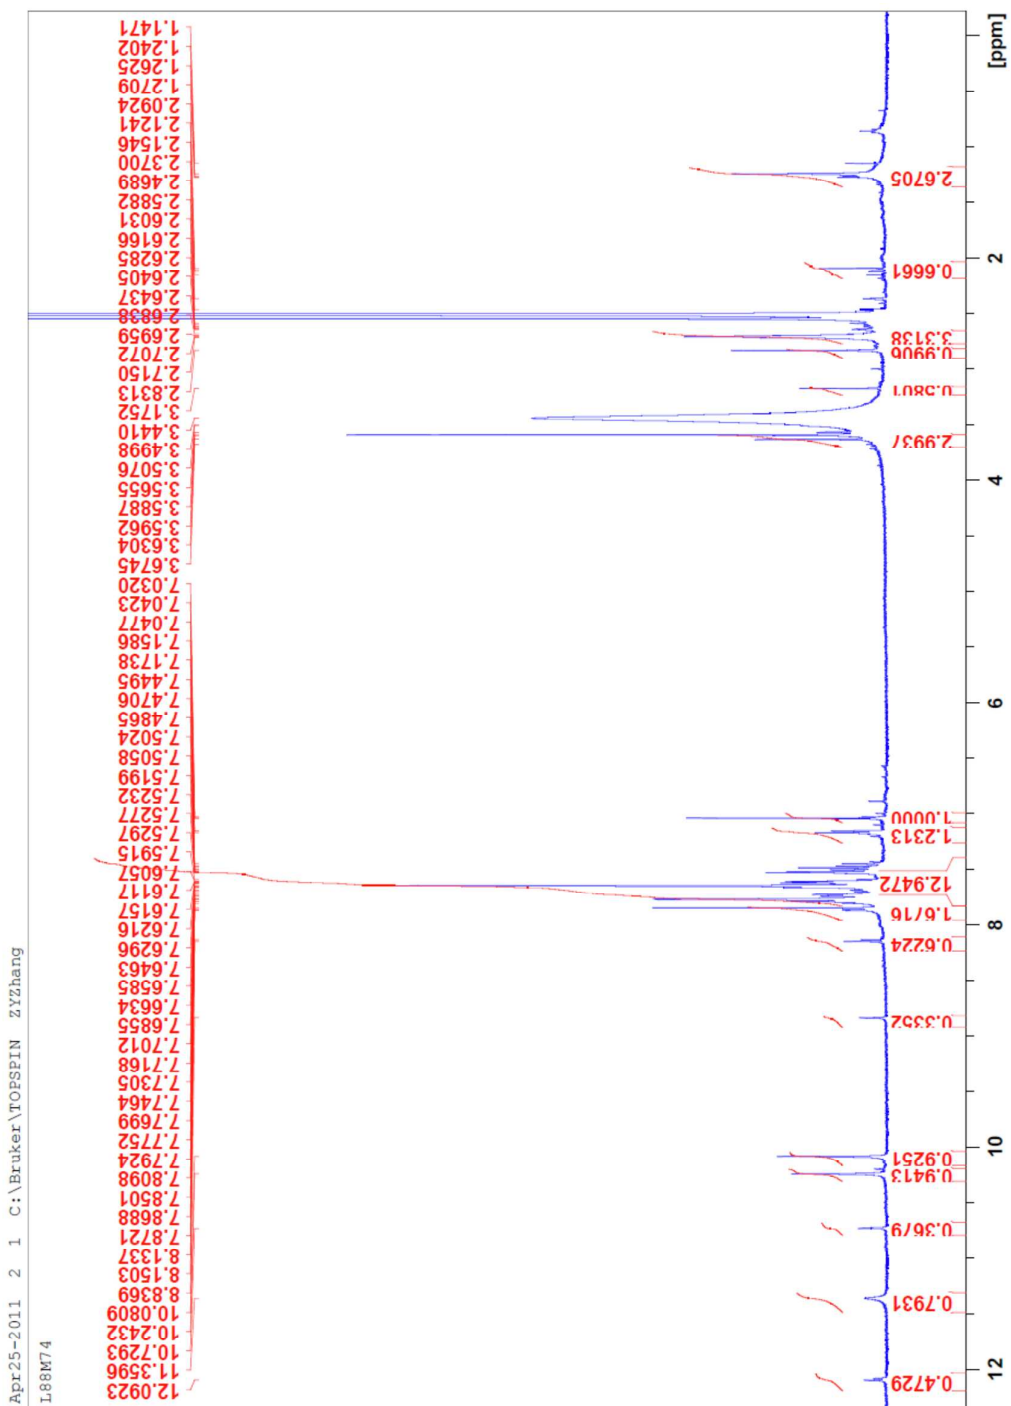



<sup>1</sup>H NMR for compound 11c-3

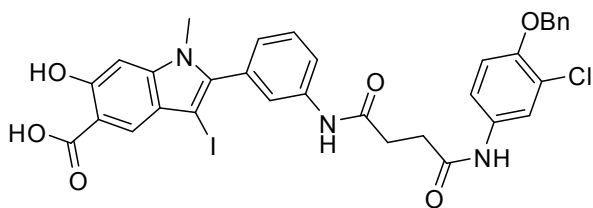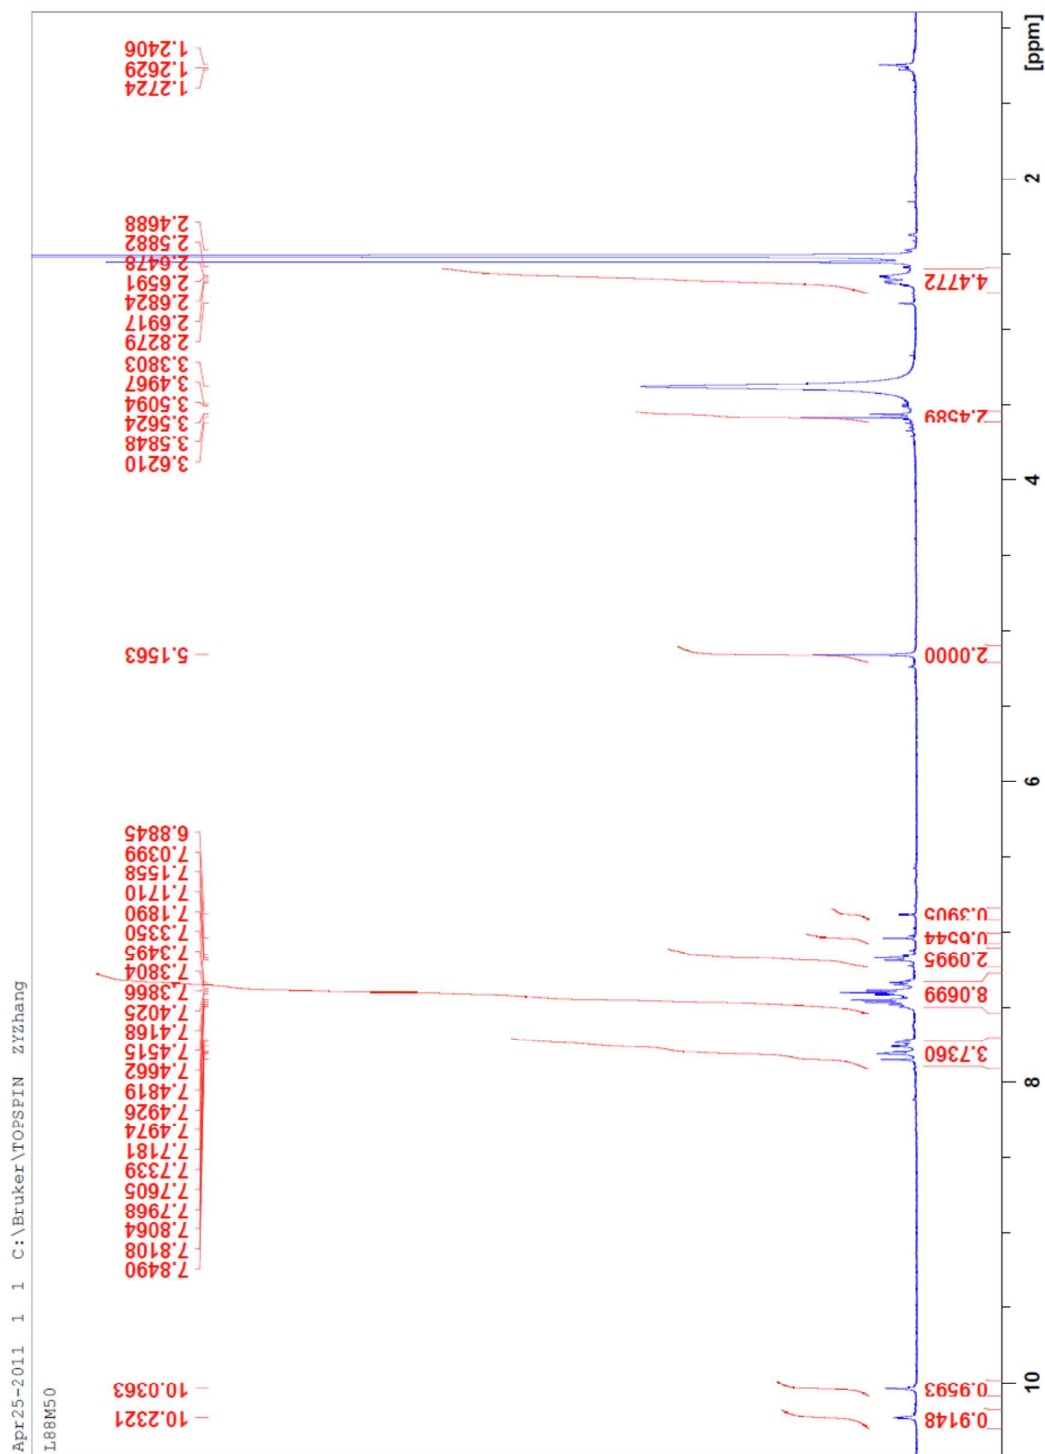

<sup>1</sup>H NMR for compound 11c-4

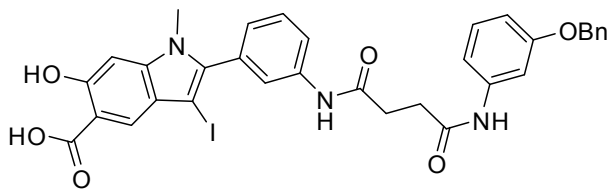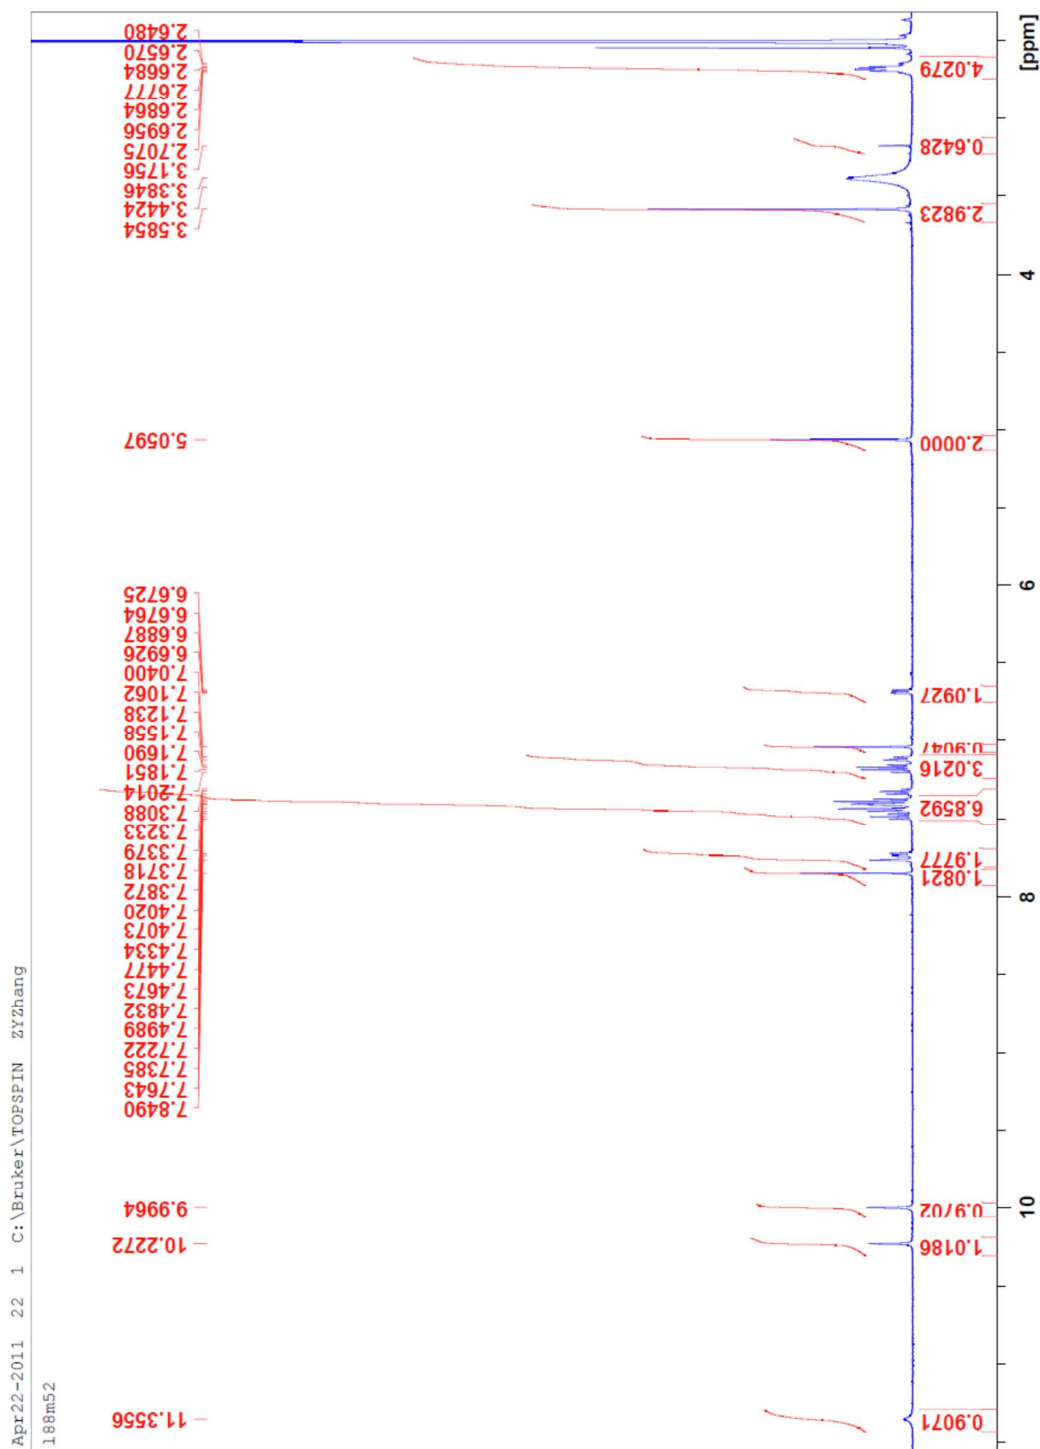

<sup>1</sup>H NMR for compound 11c-5

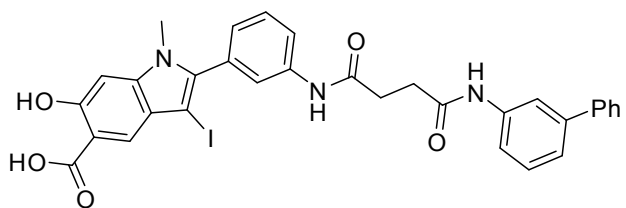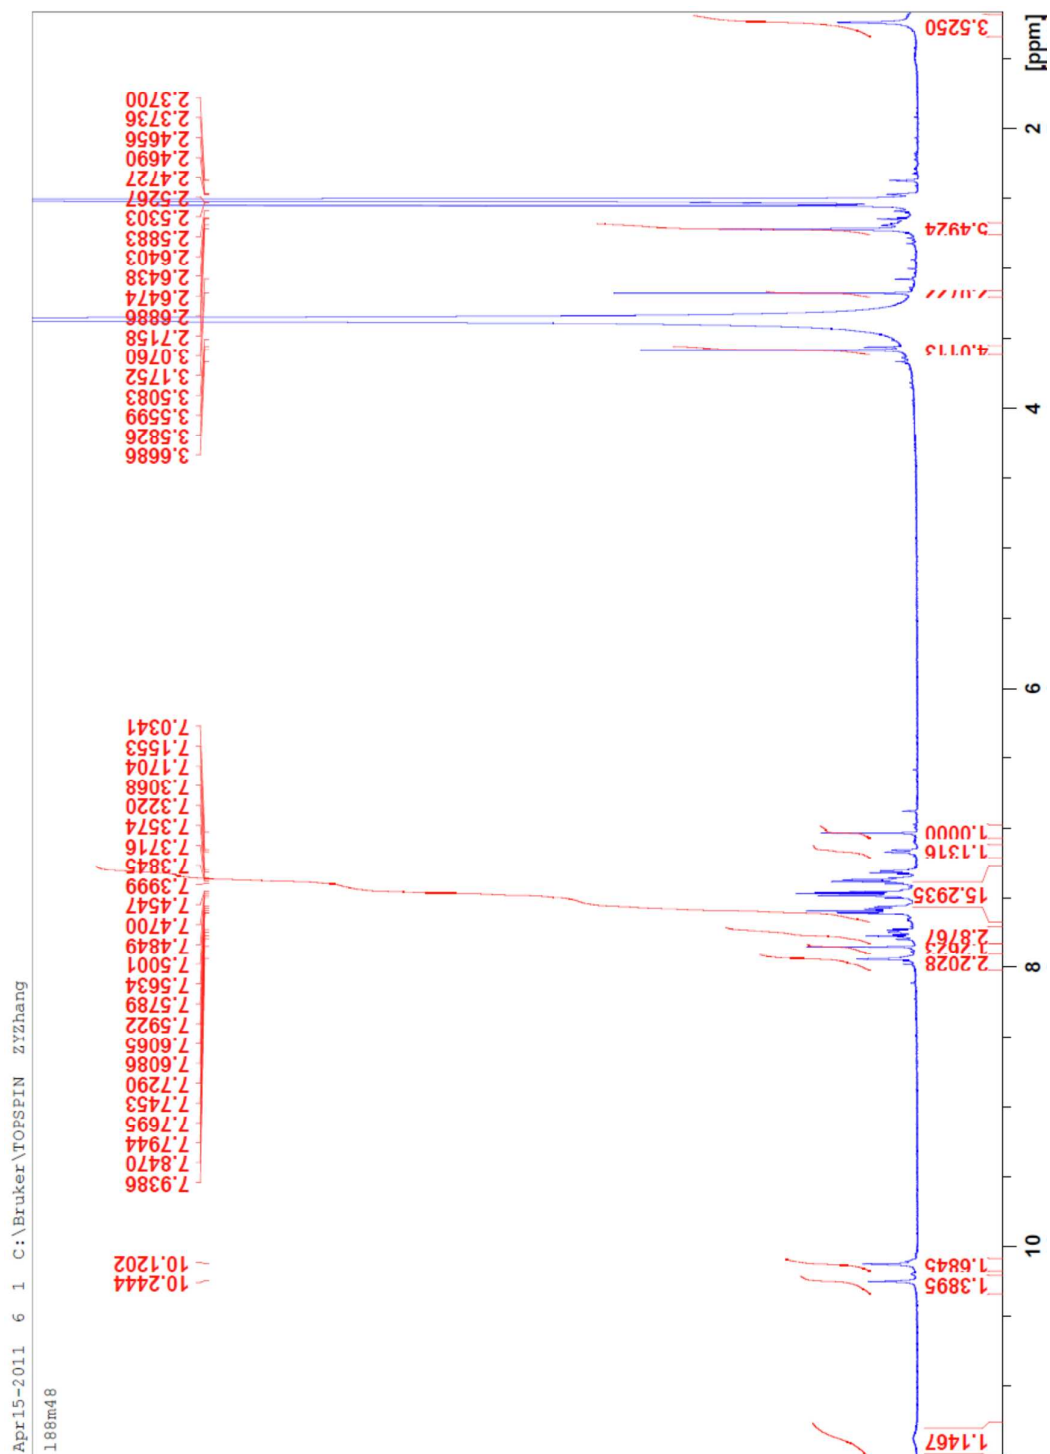



<sup>1</sup>H NMR for compound 11c-7

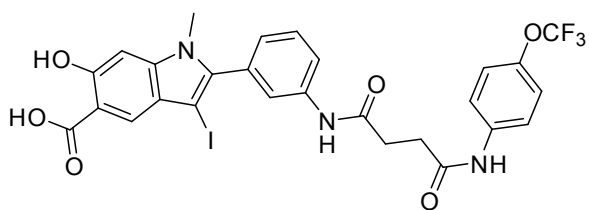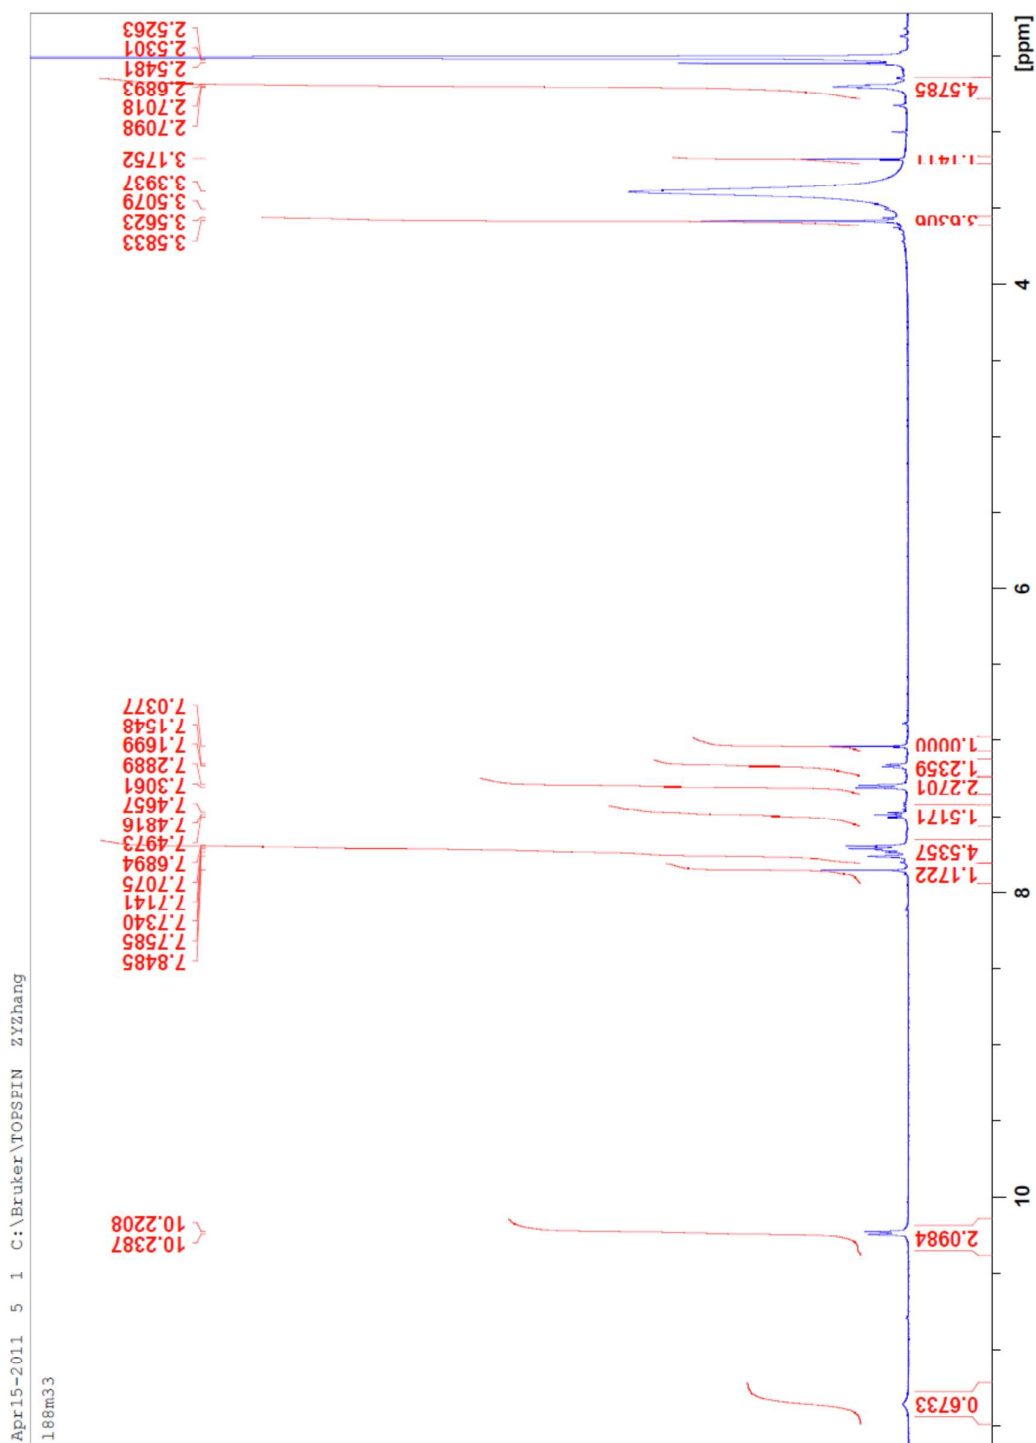

<sup>1</sup>H NMR for compound 11c-8

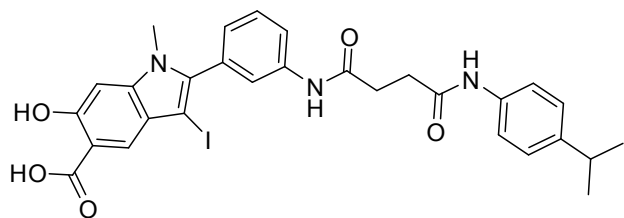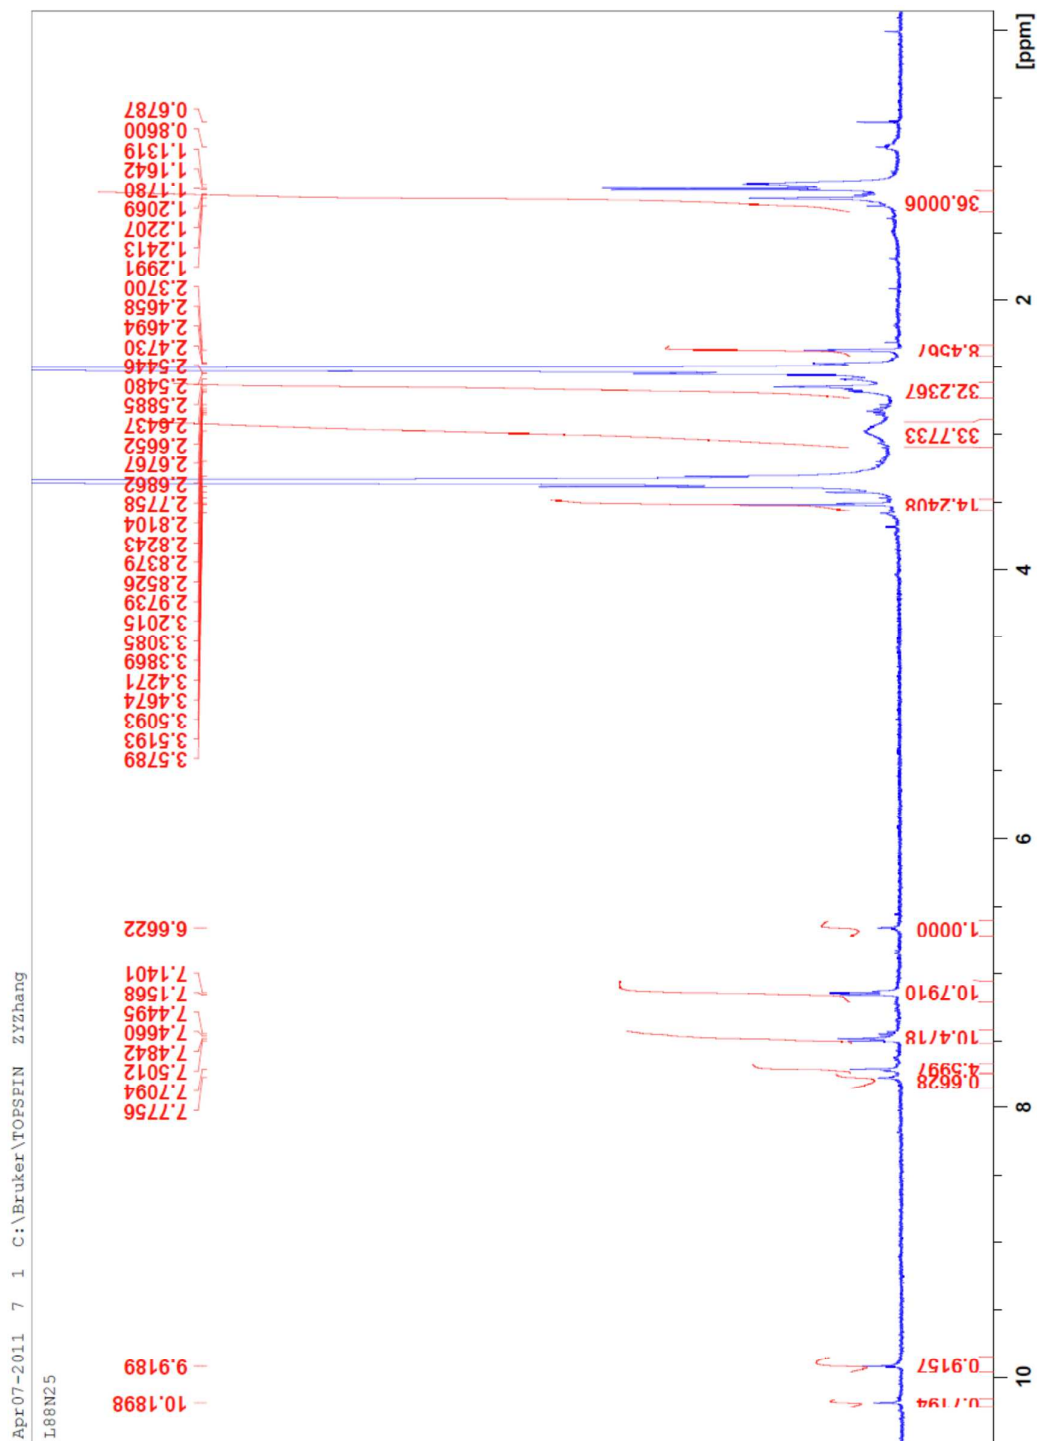



1H NMR for compound 11c-9

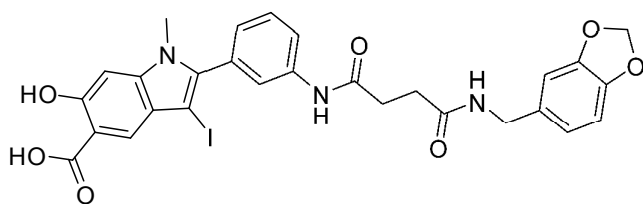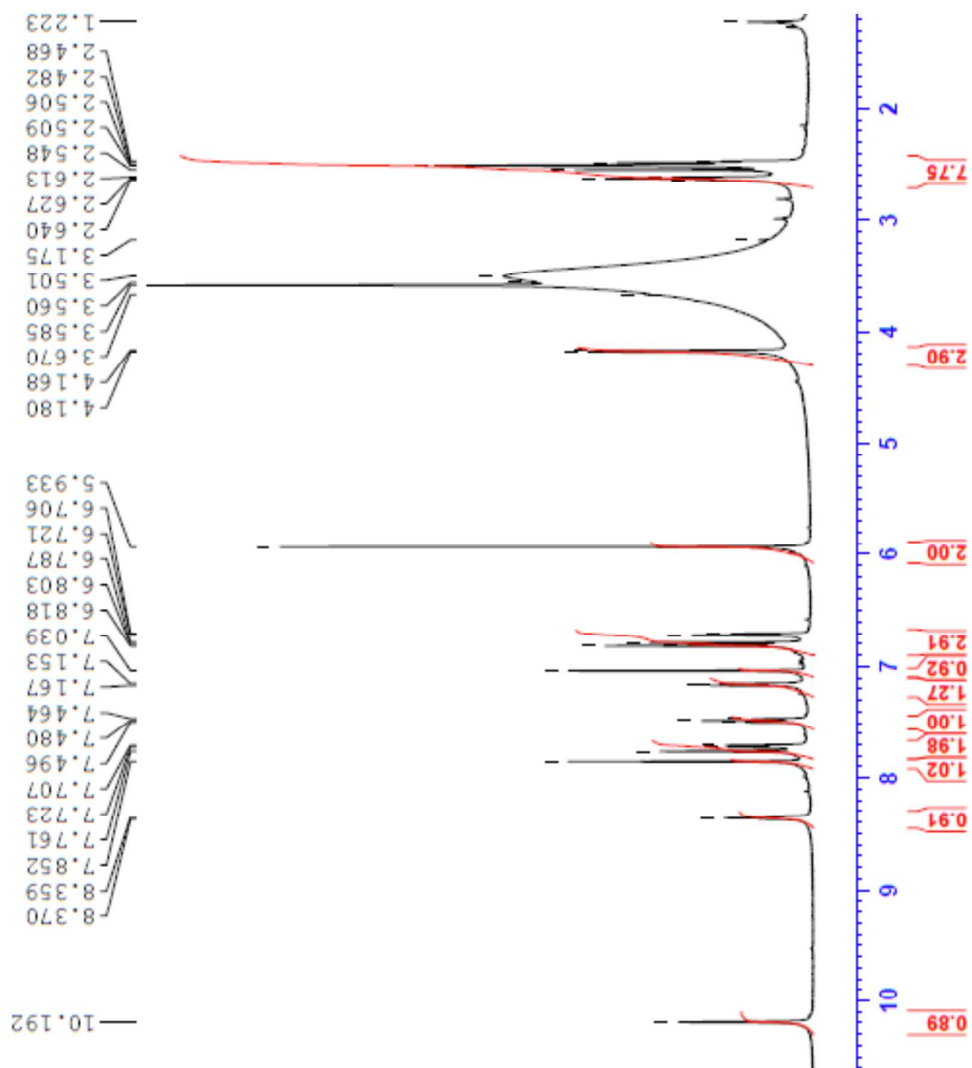

<sup>13</sup>C NMR for compound 11c-9

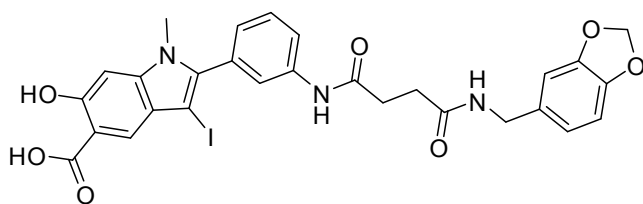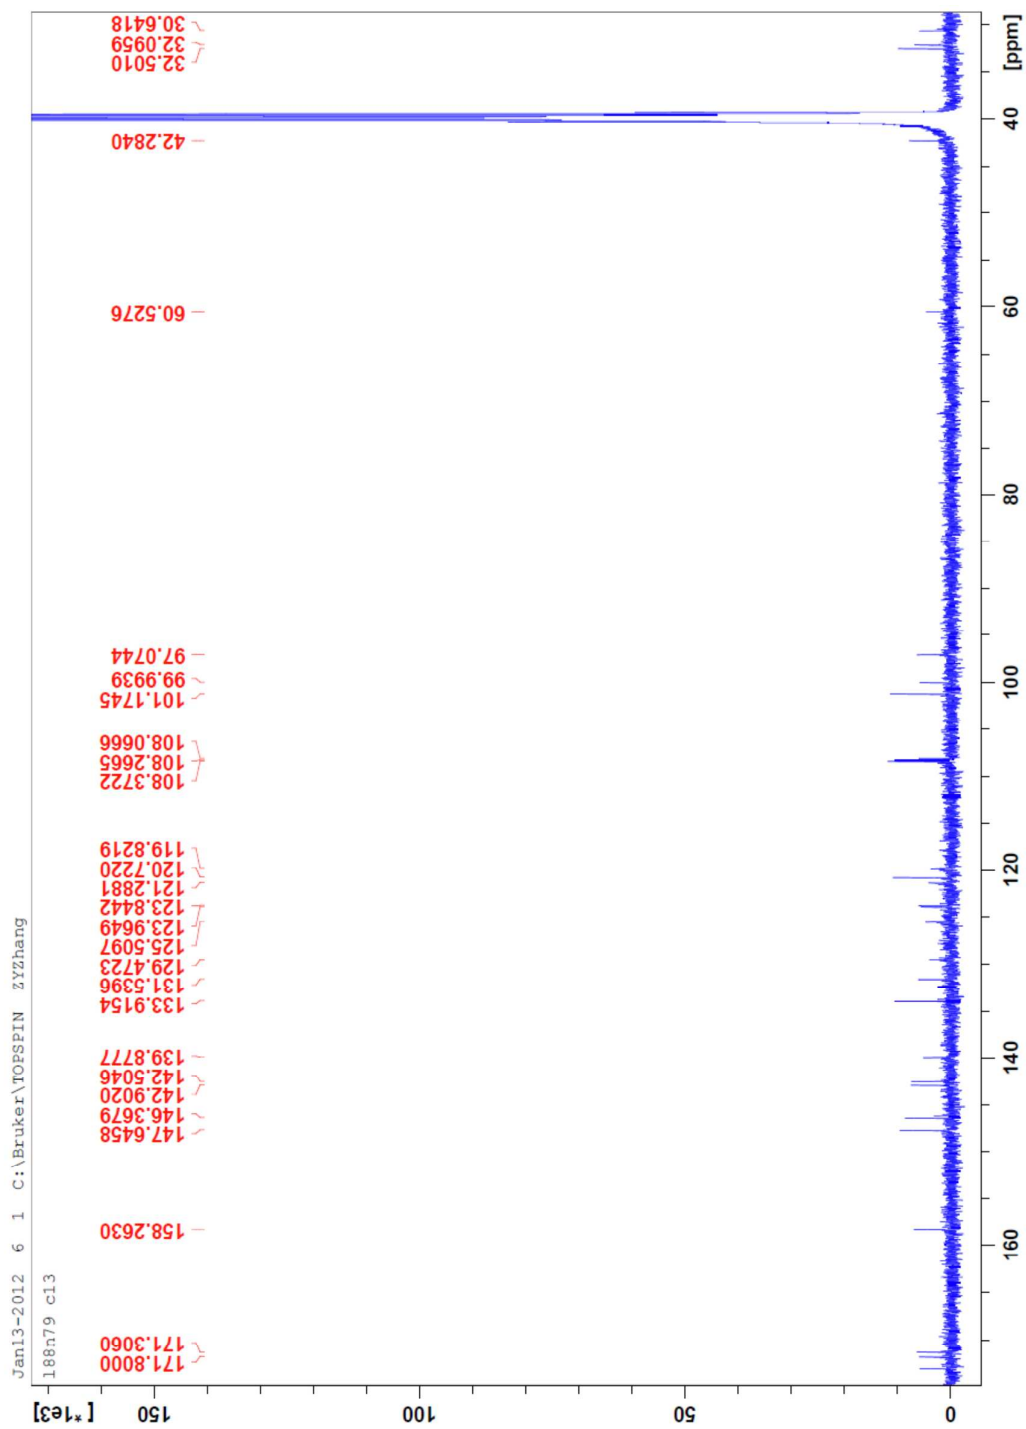

<sup>1</sup>H NMR for compound 11c-10

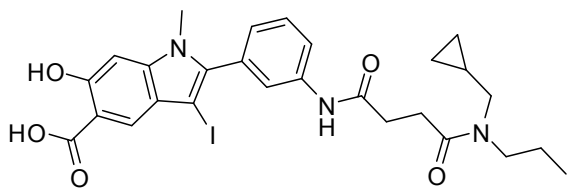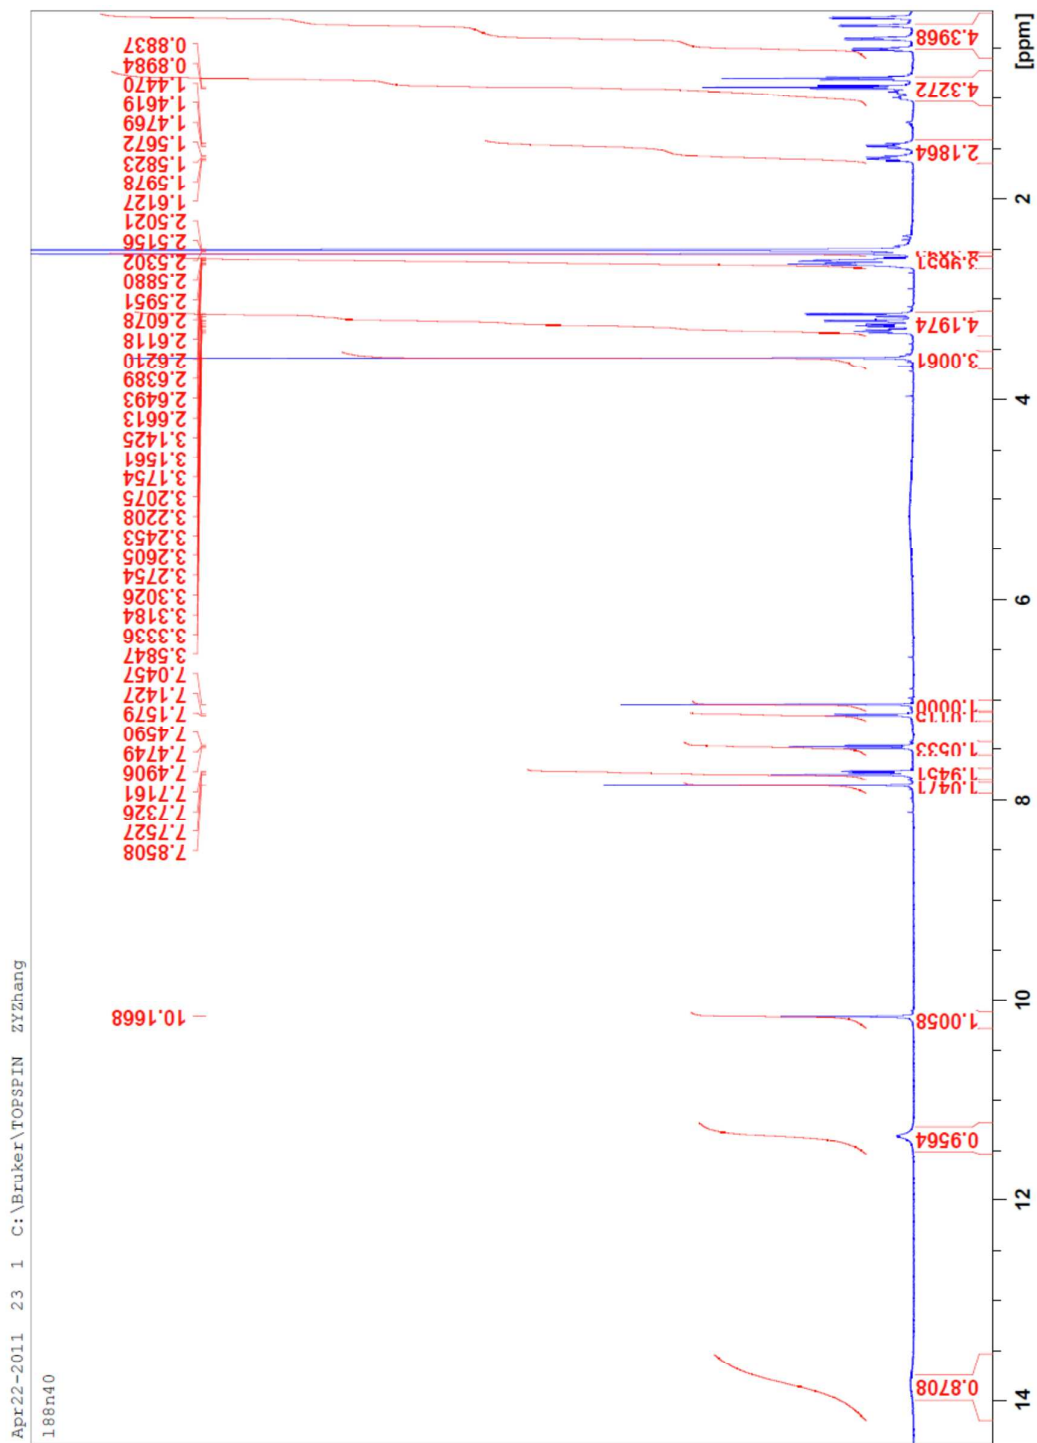

Apr22-2011 23 1 C:\Bruker\TOPSPIN zyZhang

188n40

<sup>1</sup>H NMR for compound 11c-11

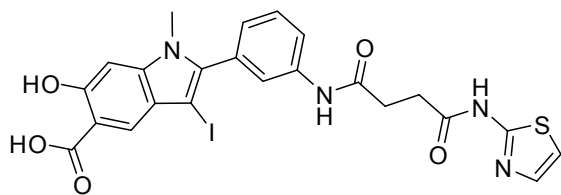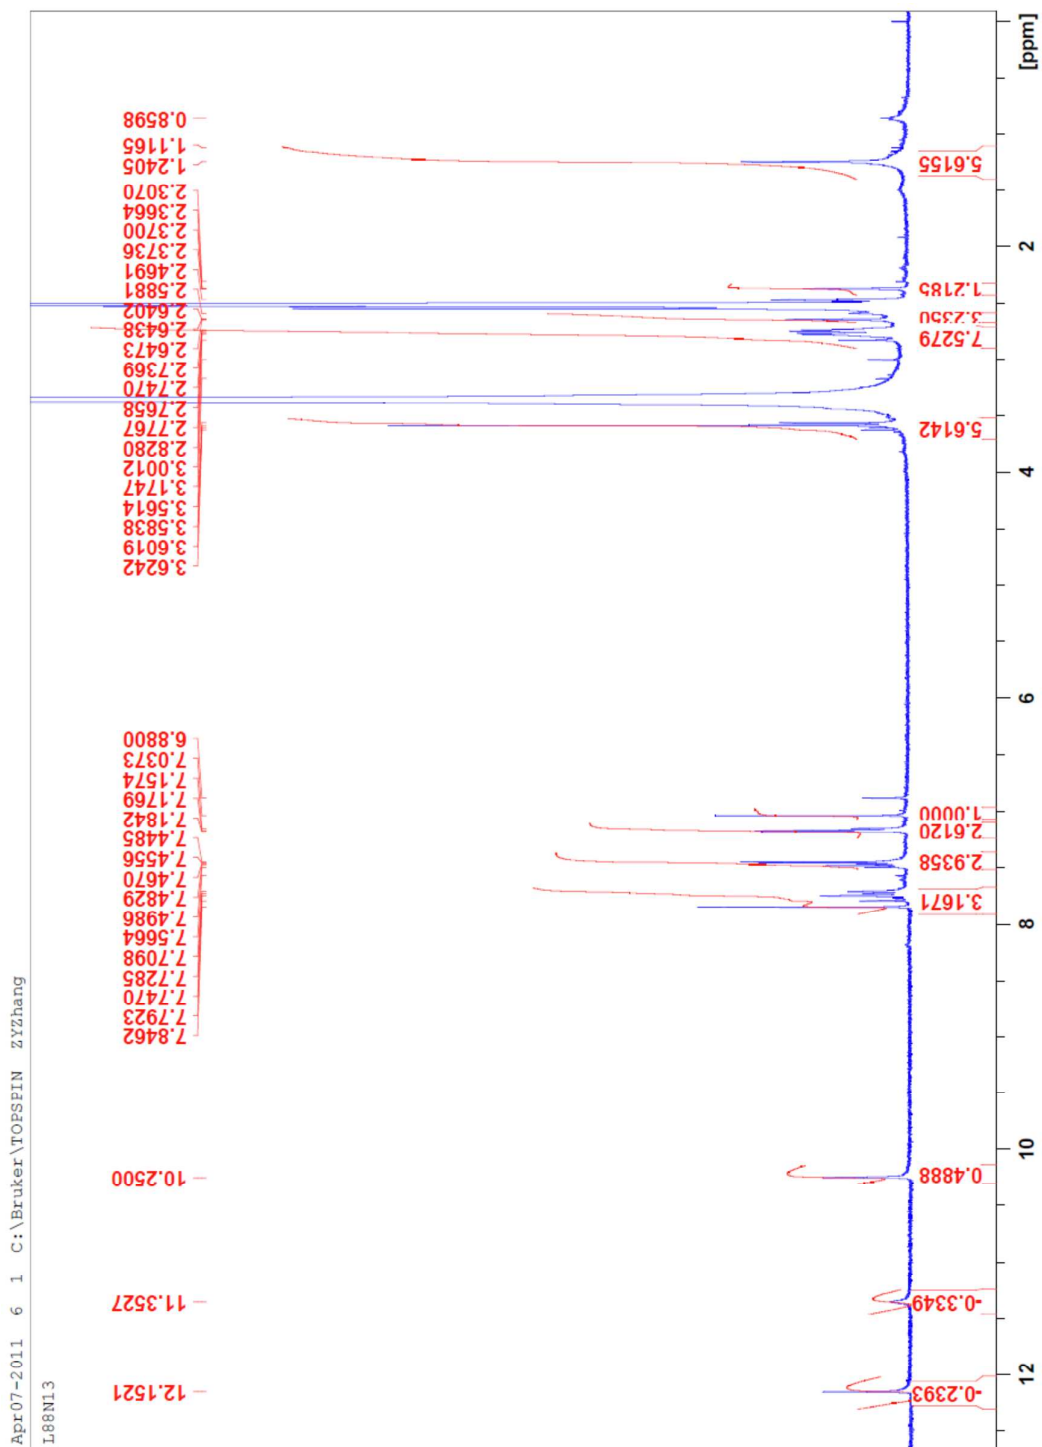

Supplement: jm5006176_si_001.pdf [file jm5006176_si_001.pdf]
